# Supplementary material for: Work stress and oral conditions: a systematic review of observational studies
Source: PubMed Central journal article supplement — BMJ Open. 2021 May 28;11(5):e046532. doi: 10.1136/bmjopen-2020-046532 (PMC8166606; doi:10.1136/bmjopen-2020-046532), 2021-05-28
Supplement: bmjopen-2020-046532.draft_revisions.pdf [file bmjopen-2020-046532.draft_revisions.pdf]

# BMJ Open

BMJ Open is committed to open peer review. As part of this commitment we make the peer review history of every article we publish publicly available.

When an article is published we post the peer reviewers' comments and the authors' responses online. We also post the versions of the paper that were used during peer review. These are the versions that the peer review comments apply to.

The versions of the paper that follow are the versions that were submitted during the peer review process. They are not the versions of record or the final published versions. They should not be cited or distributed as the published version of this manuscript.

BMJ Open is an open access journal and the full, final, typeset and author-corrected version of record of the manuscript is available on our site with no access controls, subscription charges or pay-per-view fees (<http://bmjopen.bmj.com>).

If you have any questions on BMJ Open's open peer review process please email [info.bmjopen@bmj.com](mailto:info.bmjopen@bmj.com)

# BMJ Open

## Work stress and oral conditions: A systematic review of observational studies

|                               |                                                                                                                                                                                                                                                                                                                                                                                |
|-------------------------------|--------------------------------------------------------------------------------------------------------------------------------------------------------------------------------------------------------------------------------------------------------------------------------------------------------------------------------------------------------------------------------|
| Journal:                      | <i>BMJ Open</i>                                                                                                                                                                                                                                                                                                                                                                |
| Manuscript ID                 | bmjopen-2020-046532                                                                                                                                                                                                                                                                                                                                                            |
| Article Type:                 | Original research                                                                                                                                                                                                                                                                                                                                                              |
| Date Submitted by the Author: | 04-Nov-2020                                                                                                                                                                                                                                                                                                                                                                    |
| Complete List of Authors:     | Sato, Yukihiro; Asahikawa Medical University, Division of Public Health and Epidemiology, Department of Social Medicine<br>Saijo, Yasuaki; Asahikawa Medical University, Division of Public Health and Epidemiology, Department of Social Medicine<br>Yoshioka, Eiji ; Asahikawa Medical University, Division of Public Health and Epidemiology, Department of Social Medicine |
| Keywords:                     | OCCUPATIONAL & INDUSTRIAL MEDICINE, SOCIAL MEDICINE, EPIDEMIOLOGY                                                                                                                                                                                                                                                                                                              |
|                               |                                                                                                                                                                                                                                                                                                                                                                                |

SCHOLARONE™  
Manuscripts

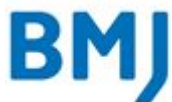

I, the Submitting Author has the right to grant and does grant on behalf of all authors of the Work (as defined in the below author licence), an exclusive licence and/or a non-exclusive licence for contributions from authors who are: i) UK Crown employees; ii) where BMJ has agreed a CC-BY licence shall apply, and/or iii) in accordance with the terms applicable for US Federal Government officers or employees acting as part of their official duties; on a worldwide, perpetual, irrevocable, royalty-free basis to BMJ Publishing Group Ltd ("BMJ") its licensees and where the relevant Journal is co-owned by BMJ to the co-owners of the Journal, to publish the Work in this journal and any other BMJ products and to exploit all rights, as set out in our [licence](#).

The Submitting Author accepts and understands that any supply made under these terms is made by BMJ to the Submitting Author unless you are acting as an employee on behalf of your employer or a postgraduate student of an affiliated institution which is paying any applicable article publishing charge ("APC") for Open Access articles. Where the Submitting Author wishes to make the Work available on an Open Access basis (and intends to pay the relevant APC), the terms of reuse of such Open Access shall be governed by a Creative Commons licence – details of these licences and which [Creative Commons](#) licence will apply to this Work are set out in our licence referred to above.

Other than as permitted in any relevant BMJ Author's Self Archiving Policies, I confirm this Work has not been accepted for publication elsewhere, is not being considered for publication elsewhere and does not duplicate material already published. I confirm all authors consent to publication of this Work and authorise the granting of this licence.

**Title**

Work stress and oral conditions: A systematic review of observational studies

**Authors**

Yukihiro Sato, DDS, PhD, 1 E-mail: yukihiro.sato@epidemiology.work

Yasuaki Saijo, MD, PhD, 1, E-mail: y-saijo@asahikawa-med.ac.jp

Eiji Yoshioka, MD, PhD, 1, E-mail: e-yoshi@asahikawa-med.ac.jp

1. Division of Public Health and Epidemiology, Department of Social Medicine, Asahikawa Medical University, Japan

**Corresponding Author**

Yukihiro Sato, D.D.S., Ph.D

E-mail: yukihiro.sato@epidemiology.work

Assistant Professor

Division of Public Health and Epidemiology, Department of Social Medicine, Asahikawa Medical University

078-8510, 1-1-1, Midorigaoka higashi2-jo, Asahikawa-shi, Hokkaido, Japan

TEL: +81 166-68-2404

FAX: +81 166-68-2409

**Word count (excluding title page, abstract, references, figures and tables)**

2,387 words

1  
2  
3  
4  
5  
6  
7  
8  
9  
10  
11  
12  
13  
14  
15  
16  
17  
18  
19  
20  
21  
22  
23  
24  
25  
26  
27  
28  
29  
30  
31  
32  
33  
34  
35  
36  
37  
38  
39  
40  
41  
42  
43  
44  
45  
46  
47  
48  
49  
50  
51  
52  
53  
54  
55  
56  
57  
58  
59  
60

1 **Abstract (290/300)**

2 **Objectives:** Psychological stress is a risk factor for oral diseases, but there seems to be no  
3 previous review on work stress. This study aimed to review the evidence on the association  
4 between work stress and oral conditions, including dental caries, periodontal status, and tooth  
5 loss.

6 **Design:** A systematic review of published observational studies.

7 **Data sources:** Systematic literature search was conducted in PubMed and Scopus databases  
8 on July 7, 2020.

9 **Study selection:** Articles were screened based on the following inclusion criteria: published  
10 in English; epidemiological studies on humans (except case studies, reviews, letters,  
11 commentaries, and editorials); and examined the association of work stress with dental caries,  
12 periodontal status, and tooth loss.

13 **Data extraction:** Data was extracted from eligible studies. Quality assessment was  
14 conducted using the Quality Assessment Tool for Observational Cohort and Cross-Sectional  
15 Studies.

16 **Results:** Of 402 articles identified, 11 met the inclusion criteria, and one study assessed the  
17 association of work stress with dental caries and periodontal status. Of 11 studies, one  
18 reported a nonsignificant association between work stress and dental caries; eight of nine  
19 studies reported a significant association between work stress and worse periodontal status;  
20 and one of two studies reported a significant association between work stress and tooth loss.  
21 Nine of eleven studies were cross-sectional while the remaining two studies were unclear.  
22 Only two studies were sufficiently adjusted for potential confounders. Eight studies assessed  
23 work stress, not using the current major measures. Three studies were rated as fair, while  
24 eight studies had poor quality.

25 **Conclusions:** There is a lack of evidence on the association of work stress with dental caries,

1  
2  
3  
4  
5  
6 26 periodontal status, and tooth loss. In future research, a cohort studies including the potential  
7  
8 27 confounding factors and use of the major measures of work stress, are needed.  
9

10 28

11  
12 29 **Keywords**

13  
14 30 systematic review, work stress, job stress, occupational stress, oral health, oral diseases  
15  
16  
17  
18  
19  
20  
21  
22  
23  
24  
25  
26  
27  
28  
29  
30  
31  
32  
33  
34  
35  
36  
37  
38  
39  
40  
41  
42  
43  
44  
45  
46  
47  
48  
49  
50  
51  
52  
53  
54  
55  
56  
57  
58  
59  
60

For peer review only

1  
2  
3  
4  
5  
6 31 **Strengths and limitations of this study**  
7

8 32 ► This is the first systematic review to evaluate and summarize the literature on the  
9  
10 33 association between work stress and oral conditions, including dental caries, periodontal  
11  
12 34 status, and tooth loss.

13  
14 35 ► This systematic review provides a comprehensive insight into the quality of the included  
15  
16 36 papers.

17  
18 37 ► The protocol of this systematic review was not registered.

19  
20 38 ► A meta-analysis could not be conducted because of the heterogeneity and the small  
21  
22 39 number of included studies.  
23  
24  
25  
26  
27  
28  
29  
30  
31  
32  
33  
34  
35  
36  
37  
38  
39  
40  
41  
42  
43  
44  
45  
46  
47  
48  
49  
50  
51  
52  
53  
54  
55  
56  
57  
58  
59  
60

## 40 INTRODUCTION

41 Oral diseases, such as dental caries and periodontal disease, still matter worldwide. The  
42 Global Burden of Disease study has estimated that 2.3 billion individuals had untreated dental  
43 caries, 796 million had severe periodontal disease, and 267 million had complete loss of  
44 natural teeth in 2017.<sup>1</sup> Briefly, dental caries is the destruction of dental hard tissues in the  
45 crowns and roots of the teeth.<sup>2</sup> Periodontal diseases are chronic inflammatory conditions with  
46 disorders of the tissues surrounding and supporting the teeth.<sup>3</sup> Tooth loss is mainly the  
47 consequence of dental caries and periodontal disease.<sup>2,3</sup> Because oral diseases result not only  
48 in severe toothache, but also in eating, sleeping, and communication disabilities,<sup>4,5</sup> poor oral  
49 conditions can restrict work performance<sup>4,5</sup> and bring about significant economic burden.<sup>6</sup>  
50 Indeed, work productivity loss due to oral conditions is estimated at 187.61 billion US dollars  
51 annually.<sup>6</sup> The necessity of prevention of oral diseases for the working adults is highlighted.

52 Since the 1990s, rapid changes in the global economy and the diverse markets have  
53 occurred,<sup>7</sup> and psychological workplace stress has become more prevalent and severe,  
54 especially among industrialized countries.<sup>7</sup> Indeed, Kivimäki et al. reported 15% prevalence  
55 of job strain measured using job-content and demand-control questionnaires from 13  
56 European cohorts' data (1985–2006).<sup>8</sup> Besides, work stress can have profound effects on  
57 health. There is accumulating evidence of the risk of work stress on cancer, cardiovascular  
58 diseases, diabetes, and depression.<sup>9,10</sup> Béjean and Sultan-Taïeb estimated that the work-  
59 related stress costs due to illnesses could be between €1,167 million and €1,975 million in  
60 France in 2000.<sup>11</sup> Work stress has impacts on the workers' health and productivity.

61 Psychological stress is recognized as a risk factor for dental caries and periodontal  
62 diseases. Psychological stress is related to oral diseases through immune system dysfunction,  
63 increases in stress hormones, cariogenic bacterial counts, and poor oral health behaviors.<sup>12,13</sup>  
64 However, although work stress is strongly linked with psychological and physical health,<sup>9,10</sup>



65 there seems to be no review on the association between work stress and oral diseases. Thus,  
66 the aim of this systematic review was to evaluate and summarize the literature on the  
67 association between work stress and oral conditions, including dental caries, periodontal  
68 status, and tooth loss. We set the following review question: Is work stress associated with  
69 dental caries, periodontal status, and tooth loss?

## 71 **METHODS**

72 The reporting of this systematic review conforms to the Preferred Reporting Items for  
73 Systematic Reviews and Meta-Analyses (PRISMA) guidelines.<sup>14,15</sup> We also followed the  
74 Conducting Systematic Reviews and Meta-Analyses of Observational Studies of Etiology  
75 (COSMOS-E) guidance<sup>16</sup> and the reporting of Meta-analysis Of Observational Studies in  
76 Epidemiology (MOOSE).<sup>17</sup>

### 77 **Eligibility criteria**

78 Published studies were eligible if they: 1) were published in English; 2) were epidemiological  
79 studies on humans (except case studies, reviews, letters, commentaries, and editorials); and  
80 3) examined the association of work stress with dental caries, periodontal status, and tooth  
81 loss.

### 82 **Information sources and searches**

83 On July 7, 2020, we identified potentially relevant published studies in PubMed (1966 to July  
84 7, 2020) and Scopus (1966 to July 7, 2020) databases. We used the following script to obtain  
85 a wide range of literatures: ("job strain" OR "effort reward") AND (dental OR oral); ("job  
86 stress" OR "work stress" OR "occupational stress") AND (dental OR oral). In addition, we  
87 manually hand-searched for potentially suitable studies through the reference lists of  
88 identified articles and Google scholar. After the exclusion of duplicate articles, one author  
89 (YuS) assessed the titles and abstracts according to the aforementioned criteria. Then, eligible

1  
2  
3  
4  
5  
6 90 studies were selected for the full-text review.  
7

### 8 91 **Data extraction**

9  
10 92 The author (YuS) extracted the following information from each eligible study: 1) name of  
11 93 the first author; 2) study design; 3) study location (country); 4) number of participants and  
12 94 work-related characteristics; 5) exposures and its measurements; 6) outcomes and its  
13 95 measurements; 7) age range and proportion of women; 8) covariates included in the adjusted  
14 96 models; and 9) the main results.  
15  
16  
17  
18  
19

### 20 97 **Quality assessment**

21  
22 98 We used the Quality Assessment Tool for Observational Cohort and Cross-Sectional Studies  
23 99 to assess the quality of included studies.<sup>18</sup> This tool includes 14 questions for evaluating the  
24 100 internal validity of a study. For each question, the author (YuS) rated them as yes, no, or  
25 101 other (including cannot determine, not reported, and not applicable). The overall quality  
26 102 rating for the study was regarded as good if all the domains were assessed favorably.  
27  
28  
29  
30  
31

### 32 103 **Synthesis of results**

33  
34 104 A meta-analysis could not be conducted because of the heterogeneity and the small number  
35 105 of included studies.  
36  
37

### 38 106 **Patient and public involvement**

39  
40 107 No patient involved.  
41  
42  
43

## 44 109 **RESULTS**

45  
46 110 Figure 1 presents the flow diagram of information through the phases of the systematic  
47 111 review. Of the 402 articles identified in PubMed and Scopus databases, 129 duplicated  
48 112 articles were removed, the titles and abstract of 273 were screened, and 11 met the eligibility  
49 113 criteria. Three more articles identified through reference lists and hand-search were added.  
50 114 After full-text assessments of 14 articles, three were excluded (due to retraction [n=1]<sup>19</sup> and  
51  
52  
53  
54  
55  
56  
57  
58  
59  
60

1  
2  
3  
4  
5  
6 115 use of composite outcomes including dental caries and periodontal status [n=2]).<sup>20,21</sup> Finally,  
7  
8 116 11 articles were included in this systematic review.<sup>22–32</sup>  
9

### 117 **Study characteristics and results of individual studies**

118 Table 1 shows the 12 summaries from the 11 studies. One of eleven studies reported on dental  
119 caries and periodontal status,<sup>22</sup> eight reported on periodontal status,<sup>23–30</sup> and two reported on  
120 tooth loss.<sup>31,32</sup> Three studies were conducted in Japan,<sup>26,30–32</sup> two in India,<sup>28,29</sup> and one each  
121 in the UK,<sup>24</sup> the US,<sup>25</sup> Brazil,<sup>22</sup> and Iraq.<sup>27</sup> One study did not report on the study location.<sup>24</sup>  
122 Among 11 studies, 9 studies were cross-sectional<sup>22,25–32</sup> and the remaining 2 studies were  
123 unclear; therefore, they were categorized as unknown.<sup>23,24</sup> The sample size was varied from  
124 10 to 1,426 among included studies. Four studies included participants who were not working  
125 adults,<sup>24–27</sup> two did not include women,<sup>22,31</sup> and two did not report on sex.<sup>27,28</sup>

126 Three studies assessed work stress using the current major measures (Job Demand-  
127 Control Model and Effort-Reward Imbalance Model).<sup>22,31,32</sup> Work stress assessed using the  
128 Karasek job strain model,<sup>22,31</sup> the Effort-Reward Imbalance model,<sup>32</sup> the Brief Job Stress  
129 Questionnaire developed by referring to the demand-control-support model in Japan,<sup>30</sup> a  
130 single job stress question,<sup>29</sup> the Occupational Stress Indicator,<sup>23,24</sup> an occupational stress  
131 index by Srivastava and Singh,<sup>28</sup> the Life events scale,<sup>26,27</sup> and the Problems of Everyday  
132 Living Scale by Pearlin and Schooler.<sup>25</sup>

133 The assessment of the presence or absence of dental caries on unrestored or restored  
134 tooth surfaces was performed using the DMFS index (the number of decayed [D], missing  
135 [M], and filled [F] teeth surfaces per person).<sup>22</sup> The measurement of periodontal status varied  
136 across included studies. The measurements included probing pocket depth,<sup>23,27,28</sup> clinical  
137 attachment level,<sup>24,25,27</sup> alveolar bone loss,<sup>25</sup> gingival index,<sup>27</sup> bleeding on probing,<sup>27</sup>  
138 Community Periodontal Index and Treatment Needs protocol,<sup>29</sup> and a composite outcome  
139 including these measures.<sup>22,30</sup> Eight studies assessed periodontal status based on clinical

1  
2  
3  
4  
5  
6 140 examinations, but one study based on visual inspection by dentists.<sup>30</sup> The assessment of tooth  
7  
8 141 loss was through oral examination<sup>31</sup> or self-reported.<sup>32</sup>  
9

10 142 Three studies presented only descriptive statistics.<sup>25,27,28</sup> Eight studies performed  
11  
12 143 regression analyses;<sup>22–24,26,29–32</sup> but two studies of them did not report the types of a regression  
13  
14 144 modeling used.<sup>23,24</sup> Only two studies sufficiently adjusted for potential confounders such as  
15  
16 145 socioeconomic status and work-related variables.<sup>22,32</sup> One study reported a nonsignificant  
17  
18 146 association between work stress and dental caries.<sup>22</sup> Eight of nine studies reported a  
19  
20 147 significant association between work stress and worse periodontal status.<sup>22–30</sup> Two studies  
21  
22 148 reported on association between work stress and tooth loss, but only one reported a significant  
23  
24 149 association.<sup>31,32</sup>  
25

## 26 150 **Study quality**

27  
28 151 Table 2 presents the results of the quality assessments for each study. Eight studies (73%)  
29  
30 152 had poor quality while three (27%) were rated as fair. None of the studies addressed question  
31  
32 153 6 (“For the analyses in this paper, were the exposure(s) of interest measured prior to the  
33  
34 154 outcome(s) being measured?”); 7 (“Was the timeframe sufficient so that one could  
35  
36 155 reasonably expect to see an association between exposure and outcome if it existed?”); and  
37  
38 156 10 (“Was the exposure(s) assessed more than once over time?”); because all the studies were  
39  
40 157 cross-sectional or the study design was unclear.  
41

## 42 158 **DISCUSSIONS**

43  
44 159 This is the first systematic review to evaluate and summarize the existing literatures on the  
45  
46 160 associations between work stress and oral conditions. Based on the findings of this review,  
47  
48 161 evidence is lacking on the association of work stress with dental caries, periodontal status,  
49  
50 162 and tooth loss. As our findings showed, only one study reported on dental caries and  
51  
52 163 periodontal status, eight reported on periodontal status, and two on tooth loss. The quality of  
53  
54 164 the 11 studies were either fair (n=3) or poor (n=8). Only two studies sufficiently adjusted for  
55  
56  
57  
58  
59  
60

1  
2  
3  
4  
5  
6 165 potential confounders.<sup>22,32</sup> One study reported a non-significant association between work  
7  
8 166 stress and dental caries.<sup>22</sup> Eight of nine studies reported the significant association between  
9  
10 167 work stress and worse periodontal status.<sup>22-30</sup> One of two studies reported a significant  
11  
12 168 association between work stress and tooth loss.<sup>31,32</sup> We could not conduct a meta-analysis  
13  
14 169 due to the small number of included studies and varied outcomes and exposure variables. In  
15  
16 170 particular, only 3 of 11 studies assessed work stress using the current major measures such  
17  
18 171 as the Job Demand-Control Model and the Effort-Reward Imbalance Model.<sup>22,31,32</sup>

### 172 **Dental caries and work stress**

173 We found only one study on the cross-sectional association between work stress and dental  
174 caries,<sup>22</sup> which included 164 paid male workers aged 35 to 44 years in Brazil. Work stress  
175 was assessed according to the Karasek job strain model.<sup>33</sup> Dental caries status was assessed  
176 using the DMFS index. After adjusting for covariates, one-point increases in the work mental  
177 demand, work control, and work variety scores were associated with 0.19 (95% confidence  
178 interval [CI] = -0.91, 1.29), 0.87 (95% CI = -0.18, 1.91), and -0.06 (95% CI = -1.57, 1.45)  
179 increases in the DMFS index, respectively, in a multivariable regression analysis. They  
180 concluded that there was no significant association between work stress and dental caries.  
181 However since the sample size was relatively small (n=164), there is the possibility of a false  
182 negative association. Besides, as there was no cohort study, we could not assess the  
183 prospective associations. Due to the above limitations, it was difficult to determine whether  
184 work stress is associated with dental caries. A further study should include a cohort design  
185 and have a relatively large sample size.

### 186 **Periodontal status and works stress**

187 Nine studies reported on the associations between work stress and periodontal status.<sup>22-30</sup>  
188 Although eight studies reported a significant association between work stress and periodontal  
189 status, the outcome measures were varied. There is a wide range of accepted epidemiological

1  
2  
3  
4  
5  
6 190 definitions for periodontitis;<sup>34,35</sup> but as previous studies pointed, the definition of periodontal  
7  
8 191 disease has been numerous and lacked the consensus.<sup>36</sup> Thus, it was difficult to estimate  
9  
10 192 periodontal disease prevalence.<sup>37</sup> None of the included studies used the accepted  
11  
12 193 epidemiological definition of periodontal disease. In addition to the above limitation, how  
13  
14 194 work stress was measured also varied across studies. Each measure assessed different  
15  
16 195 dimensions of work stress.<sup>38</sup> Due to the heterogeneity of exposures and outcomes, we could  
17  
18 196 not conduct a meta-analysis.

19  
20 197         The quality of most studies was poor. The study design was unclear in two.<sup>23,24</sup>  
21  
22 198 Freeman and Goss assessed work stress and periodontal status over a 12-month period.<sup>23</sup>  
23  
24 199 However, they did not clearly report when work stress and periodontal status variables were  
25  
26 200 assessed and how they were used in the statistical models. Besides, the type of regression  
27  
28 201 model could not be identified. Linden et al. followed-up patients for 5.5 years,<sup>24</sup> but work  
29  
30 202 stress was only assessed at follow-up examination, not at baseline survey. In addition, the  
31  
32 203 study included patients with moderate or established periodontitis, and the type of regression  
33  
34 204 model could not be identified. Three studies presented only descriptive statistics.<sup>25,27,28</sup> The  
35  
36 205 remaining four papers reported significant associations following regression  
37  
38 206 analyses.<sup>22,26,29,30</sup> However, Akhter et al. did not use a questionnaire specific to work stress  
39  
40 207 and included also nonworking adults.<sup>26</sup> Islam et al. used the Brief Job Stress Questionnaire  
41  
42 208 developed by referring to the demand-control-support model in Japan and, periodontal status  
43  
44 209 was assessed based on the visual inspection by dentists.<sup>30</sup> Important potential confounders  
45  
46 210 such as socioeconomic status and work-related variables were not included. Ramji assessed  
47  
48 211 work stress using a single job stress question and did not adjust for covariates in the statistical  
49  
50 212 models.<sup>29</sup> Therefore, only one study was assessed as fair.<sup>22,30</sup> Marcenes and Sheiham assessed  
51  
52 213 the association between periodontal status and work stress.<sup>22</sup> Periodontal status was assessed  
53  
54 214 by the presence or absence of gums bleeding on probing, or with pockets. They divided them

1  
2  
3  
4  
5  
6 215 into groups based on "complete absence of teeth with gums bleeding on probing and with  
7  
8 216 pockets," or "presence of any tooth with gums bleeding on probing or pockets," and defined  
9  
10 217 the latter as those with periodontal disease. After adjusting for covariates, one-point increases  
11  
12 218 in work mental demand scores, work control scores, and work variety scores were associated  
13  
14 219 with ORs of 1.22 (95%CI = 1.06, 1.37), 0.97 (95%CI = 0.88, 1.07), and 0.99 (95%CI = 0.85,  
15  
16 220 1.16) , respectively, for having periodontal disease, in a logistic regression model. A further  
17  
18 221 cohort study, using the validated definitions of periodontal disease, including the potential  
19  
20 222 confounding factors, and current major measurements of work stress should be performed.

### 223 **Tooth loss and work stress**

224 Two studies were identified on the association between work stress and tooth loss. One of  
25  
26 225 the two reported a significant association between work stress and tooth loss.<sup>31,32</sup> Hayashi et  
27  
28 226 al. reported the association between work stress, assessed using the Karasek job strain model,  
29  
30 227 and tooth loss.<sup>31</sup> A total of 322 male workers employed at a manufacturing company were  
31  
32 228 included. They dichotomized the number of tooth loss into  $\leq 3$  and  $\geq 4$ . After adjusting for  
33  
34 229 covariates, high job demand and low control conditions were associated with high odds of  
35  
36 230 having  $\geq 4$  teeth loss but not significant (OR = 1.2 [95% CI = 0.40, 3.42]). This study did not  
37  
38 231 adjust for the important potential confounders. Sato et al. reported the association between  
39  
40 232 work stress, assessed using the effort–reward imbalance model, and self-reported tooth loss.<sup>32</sup>  
41  
42 233 After adjusting for covariates including socioeconomic status and work-related variables, a  
43  
44 234 high effort-reward imbalance ratio was significantly associated with a high prevalence of  $\geq 1$   
45  
46 235 tooth loss (prevalence ratio = 1.20 [95% CI = 1.01, 1.42]). A further study should include a  
47  
48 236 cohort design and potential confounding factors.

### 237 **Conclusions**

238 Based on the findings, this systematic review suggests a lack of evidence on the association  
53  
54 239 of work stress with dental caries, periodontal status, and tooth loss. For future research, well-

1  
2  
3  
4  
5  
6 240 designed cohort studies including potential confounding factors and the use of generally  
7  
8 241 accepted measurements of work stress are needed.  
9  
10  
11  
12  
13  
14  
15  
16  
17  
18  
19  
20  
21  
22  
23  
24  
25  
26  
27  
28  
29  
30  
31  
32  
33  
34  
35  
36  
37  
38  
39  
40  
41  
42  
43  
44  
45  
46  
47  
48  
49  
50  
51  
52  
53  
54  
55  
56  
57  
58  
59  
60

For peer review only



**Contributors**

YuS contributed to the acquisition and the interpretation of data and drafting of the work. YaS and EY revised it critically for important intellectual content. The all authors contributed to the conception and design of the work, and confirmed final approval of the version to be published, and agreed to be accountable for all aspects of the work in ensuring that questions related to the accuracy or integrity of any part of the work are appropriately investigated and resolved.

**Funding**

This study was supported by Grant-in-Aid for Early-Career Scientists from the Japan Society for the Promotion of Science KAKENHI (grant number JP19K19306).

**Competing interests**

The authors declare no potential conflicts of interest with respect to the research, authorship, and publication of this article.

**Patient consent for publication**

Not required.

**Provenance and peer review**

Not commissioned; externally peer reviewed.

**Data availability statement**

No additional data are available.

## References

1. Bernabe E, Marcenes W, Hernandez CR, et al. Global, Regional, and National Levels and Trends in Burden of Oral Conditions from 1990 to 2017: A Systematic Analysis for the Global Burden of Disease 2017 Study. *J Dent Res*. 2020;99(4):362-373.
2. Pitts NB, Zero DT, Marsh PD, et al. Dental caries. *Nature Reviews Disease Primers*. 2017;3(1):17030.
3. Kinane DF, Stathopoulou PG, Papapanou PN. Periodontal diseases. *Nature Reviews Disease Primers*. 2017;3(1):17038.
4. Sheiham A, Croog SH. The psychosocial impact of dental diseases on individuals and communities. *Journal of Behavioral Medicine*. 1981;4(3):257-272.
5. Reisine ST. The Impact of Dental Conditions on Social Functioning and the Quality of Life. *Annu Rev Public Health*. 1988;9(1):1-19.
6. Righolt AJ, Jevdjevic M, Marcenes W, Listl S. Global-, Regional-, and Country-Level Economic Impacts of Dental Diseases in 2015. *J Dent Res*. 2018;97(5):501-507.
7. Lundberg U, Cooper C. The New Workplace in a Rapidly Changing World. In: *The Science of Occupational Health*. John Wiley & Sons, Ltd; 2011:11-21.
8. Kivimäki M, Nyberg ST, Batty GD, et al. Job strain as a risk factor for coronary heart disease: a collaborative meta-analysis of individual participant data. *The Lancet*. 2012;380(9852):1491-1497.
9. Berkman L, Kawachi I, Theorell T. Working Conditions and Health. In: *Social Epidemiology*. Oxford University Press New York; 2014:153-181.
10. Lundberg U, Cooper C. Stress-Related Health Problems. In: *The Science of Occupational Health*. John Wiley & Sons, Ltd; 2011:75-91.
11. Béjean S, Sultan-Taïeb H. Modeling the economic burden of diseases imputable to stress at work. *The European Journal of Health Economics*. 2005;6(1):16-23.
12. Sabbah W, Gomaa N, Gireesh A. Stress, allostatic load, and periodontal diseases. *Periodontology 2000*. 2018;78(1):154-161.
13. Gomaa N, Glogauer M, Tenenbaum H, Siddiqi A, Quiñonez C. Social-Biological Interactions in Oral Disease: A ‘Cells to Society’ View. *PLOS ONE*. 2016;11(1):e0146218.
14. Moher D, Liberati A, Tetzlaff J, Altman DG. Preferred reporting items for systematic reviews and meta-analyses: the PRISMA statement. *BMJ*. 2009;339:b2535.
15. Liberati A, Altman DG, Tetzlaff J, et al. The PRISMA statement for reporting systematic reviews and meta-analyses of studies that evaluate healthcare interventions:

1  
2  
3  
4  
5  
6 explanation and elaboration. *BMJ*. 2009;339:b2700.

7 16. Dekkers OM, Vandenbroucke JP, Cevallos M, Renehan AG, Altman DG, Egger  
8 M. COSMOS-E: Guidance on conducting systematic reviews and meta-analyses of  
9 observational studies of etiology. *PLoS Med*. 2019;16(2):e1002742-e1002742.

10 17. Stroup DF, Berlin JA, Morton SC, et al. Meta-analysis of Observational Studies in  
11 Epidemiology A Proposal for Reporting. *JAMA*. 2000;283(15):2008-2012.

12 18. National Institutes of Health. Quality Assessment Tool for Observational Cohort  
13 and Cross-Sectional Studies.

14 19. Atri M, Srivastava D, Kharbanda J, Bugalia A, Yousuf A, Anup N. Occupational  
15 Stress, Salivary Cortisol, and Periodontal Disease: A Clinical and Laboratory Study  
16 [retracted in: *J Int Oral Health*. 2016 May;8(5):650]. *J Int Oral Health*. 2015;7(9):65-69.

17 20. Yoshiono K, Suzuki S, Ishizuka Y, Takayanagi A, Sugihara N, Kamijyo H.  
18 Relationship between job stress and subjective oral health symptoms in male financial  
19 workers in Japan. *Industrial Health*. 2017;55(2):119-126.

20 21. Capurro DA, Davidsen M. Socioeconomic inequalities in dental health among  
21 middle-aged adults and the role of behavioral and psychosocial factors: evidence from the  
22 Spanish National Health Survey. *International Journal for Equity in Health*. 2017;16(1):34.

23 22. Segura Marcenes W, Sheiham A. The relationship between work stress and oral  
24 health status. *Social Science & Medicine*. 1992;35(12):1511-1520.

25 23. Freeman R, Goss S. Stress measures as predictors of periodontal disease – a  
26 preliminary communication. *Community Dentistry and Oral Epidemiology*.  
27 1993;21(3):176-177.

28 24. Linden GJ, Mullally BH, Freeman R. Stress and the progression of periodontal  
29 disease. *Journal of Clinical Periodontology*. 1996;23(7):675-680.

30 25. Genco RJ, Ho AW, Grossi SG, Dunford RG, Tedesco LA. Relationship of Stress,  
31 Distress, and Inadequate Coping Behaviors to Periodontal Disease. *Journal of*  
32 *Periodontology*. 1999;70(7):711-723.

33 26. Akhter R, Hannan MA, Okhubo R, Morita M. Relationship between stress factor  
34 and periodontal disease in a rural area population in Japan. *Eur J Med Res*.  
35 2005;10(8):352-357.

36 27. Talib Bandar K. The association between periodontal disease and job stress in  
37 Baghdad city. *Journal of Kerbala University*. 2009;5(4):47-57.

38 28. Mahendra L, Mahendra J, Austin RD, Rajasekhar S, Mythili R. Stress as an  
39  
40  
41  
42  
43  
44  
45  
46  
47  
48  
49  
50  
51  
52  
53  
54  
55  
56  
57  
58  
59  
60

1  
2  
3  
4  
5  
6  
7  
8  
9  
10  
11  
12  
13  
14  
15  
16  
17  
18  
19  
20  
21  
22  
23  
24  
25  
26  
27  
28  
29  
30  
31  
32  
33  
34  
35  
36  
37  
38  
39  
40  
41  
42  
43  
44  
45  
46  
47  
48  
49  
50  
51  
52  
53  
54  
55  
56  
57  
58  
59  
60

aggravating factor for periodontal diseases. *J Clin Diagn Res.* 2011;5:889–93.

29. Ramji R. Assessing the relationship between occupational stress and periodontitis in industrial workers. Published online 2011.

30. Islam MM, Ekuni D, Yoneda T, Yokoi A, Morita M. Influence of Occupational Stress and Coping Style on Periodontitis among Japanese Workers: A Cross-Sectional Study. *Int J Environ Res Public Health.* 2019;16(19):3540.

31. Hayashi N, Tamagawa H, Tanaka M, et al. Association of Tooth Loss with Psychosocial Factors in Male Japanese Employees. *Journal of Occupational Health.* 2001;43(6):351-355.

32. Sato Y, Tsuboya T, Aida J, Saijo Y, Yoshioka E, Osaka K. Effort-reward imbalance at work and tooth loss: a cross-sectional study from the J-SHINE project. *Ind Health.* 2020;58(1):26-34.

33. Karasek RA. Job Demands, Job Decision Latitude, and Mental Strain: Implications for Job Redesign. *Administrative Science Quarterly.* 1979;24(2):285-308.

34. Page RC, Eke PI. Case Definitions for Use in Population-Based Surveillance of Periodontitis. *Journal of Periodontology.* 2007;78(7S):1387-1399.

35. Tonetti MS, Claffey N, on behalf of the European Workshop in Periodontology group C. Advances in the progression of periodontitis and proposal of definitions of a periodontitis case and disease progression for use in risk factor research. *Journal of Clinical Periodontology.* 2005;32(s6):210-213.

36. Leroy R, Eaton KA, Savage A. Methodological issues in epidemiological studies of periodontitis - how can it be improved? *BMC Oral Health.* 2010;10(1):8.

37. Holtfreter B, Albandar JM, Dietrich T, et al. Standards for reporting chronic periodontitis prevalence and severity in epidemiologic studies. *Journal of Clinical Periodontology.* 2015;42(5):407-412.

38. Leka S, Jain A, World Health Organization. Health impact of psychosocial hazards at work: an overview. Published online 2010.

## Tables

Table 1. Summary of included studies on work stress and oral conditions

| Author's name (year of publication)       | Study design    | Study location | Exposure (work stress)                                           | Outcome                                                                                                                                                                                                                                                                         | Number of participants                                                       | Mean age of the participants and proportion of women | Covariates                                                                                                                                                       | Main results                                                                                                                                                                                                                                                                                                                    |
|-------------------------------------------|-----------------|----------------|------------------------------------------------------------------|---------------------------------------------------------------------------------------------------------------------------------------------------------------------------------------------------------------------------------------------------------------------------------|------------------------------------------------------------------------------|------------------------------------------------------|------------------------------------------------------------------------------------------------------------------------------------------------------------------|---------------------------------------------------------------------------------------------------------------------------------------------------------------------------------------------------------------------------------------------------------------------------------------------------------------------------------|
| <b>Dental caries</b>                      |                 |                |                                                                  |                                                                                                                                                                                                                                                                                 |                                                                              |                                                      |                                                                                                                                                                  |                                                                                                                                                                                                                                                                                                                                 |
| Marcenes and Sheiham (1992) <sup>22</sup> | Cross-sectional | Brazil         | Karasek job strain model                                         | DMFS index (number of decayed (D), missing (M), and Filled (F) teeth surfaces per persons)                                                                                                                                                                                      | 164 male paid workers aged from 35 to 44 years                               | Mean age = 41.2 (standard deviation = 2.2) 0%        | Marital quality, toothbrushing frequency, sugar consumption, age, years of residence, type of toothpaste, frequency dental attendance, and socio-economic status | Work mental demand: Coefficients = 0.19 (95% CI = -0.91, 1.29)<br>Work control: Coefficients = 0.87 (95% CI = -0.18, 1.91)<br>Work variety: Coefficients = -0.06 (95% CI = -1.57, 1.45)<br>From a linear regression analysis                                                                                                    |
| <b>Periodontal status</b>                 |                 |                |                                                                  |                                                                                                                                                                                                                                                                                 |                                                                              |                                                      |                                                                                                                                                                  |                                                                                                                                                                                                                                                                                                                                 |
| Marcenes and Sheiham (1992) <sup>22</sup> | Cross-sectional | Brazil         | Karasek job strain model                                         | The presence or absence of teeth either with gums bleeding on probing or with pockets was used. The indicator was labelled as 'complete absence of teeth with gums bleeding on probing and with pockets', and 'presence of any tooth with gums bleeding on probing or pockets'. | 164 male paid workers aged from 35 to 44 years                               | Mean age = 41.2 (standard deviation = 2.2) 0%        | Marital quality, toothbrushing frequency, sugar consumption, age, years of residence, type of toothpaste, frequency dental attendance, and socio-economic status | Work mental demand: Odds ratio = 1.22 (95% confidence interval = 1.06, 1.37)<br>Work control: Odds ratio = 0.97 (95% confidence interval = 0.88, 1.07)<br>Work variety: Odds ratio = 0.99 (95% confidence interval = 0.85, 1.16)<br>From a logistic regression analysis<br>Type A behavior: Coefficients = 0.41 (p-value=0.003) |
| Freeman and Goss (1993) <sup>23</sup>     | Unknown         | Not reported   | Occupational Stress Indicator                                    | Mean increases in pocket depth                                                                                                                                                                                                                                                  | 10 women and 8 men from the head office of a large company                   | Mean age = 39 55.6%                                  | None                                                                                                                                                             | Work environment (organization/climate): Coefficients = -0.34 (p-value=0.007) (statistical model was not reported)                                                                                                                                                                                                              |
| Linden et al. (1996) <sup>24</sup>        | Unknown         | UK             | Occupational Stress Indicator assessed at the second examination | Changes in clinical attachment level after an interval of 5.5 (SD 0.6) years.                                                                                                                                                                                                   | 23 regular dental attendees aged between 20 and 50 years who had moderate or | Mean age = 41.1 (standard deviation = 7.3) 43.5%     | Age and social class of the household                                                                                                                            | Job satisfaction: Coefficients = -0.014 (p-value < 0.01)<br>Type A: Coefficients = 0.026 (p-value < 0.05)                                                                                                                                                                                                                       |

|    |                      |           |       |                                       |                           |                  |      |                               |                                    |
|----|----------------------|-----------|-------|---------------------------------------|---------------------------|------------------|------|-------------------------------|------------------------------------|
| 1  |                      |           |       |                                       | established periodontitis |                  |      |                               | Locus of control: Coefficients = - |
| 2  |                      |           |       |                                       | (13 men and 10            |                  |      |                               | 0,035 (p-value ≥ 0.05)             |
| 3  |                      |           |       |                                       | women)                    |                  |      |                               | (statistical model was not         |
| 4  |                      |           |       |                                       |                           |                  |      |                               | reported)                          |
| 5  |                      |           |       |                                       |                           |                  |      |                               | Job strain score among             |
| 6  |                      |           |       |                                       |                           |                  |      |                               | Attachment Loss categories         |
| 7  |                      |           |       |                                       |                           |                  |      |                               | (mean ± standard error)            |
| 8  |                      |           |       | Severity of Attachment Loss           |                           |                  |      |                               | Healthy: 2.12 ± 0.05               |
| 9  |                      |           |       | Healthy (0 to 1 mm clinical           |                           |                  |      |                               | Low: 2.09 ± 0.02                   |
| 10 |                      |           |       | attachment level), low (1.1 to 2.0    |                           |                  |      |                               | Moderate: 2.16 ± 0.02              |
| 11 |                      |           |       | mm), moderate (2.1 to 3.0 mm),        |                           |                  |      |                               | High: 2.09 ± 0.05                  |
| 12 | Genco et al.         | Cross-    | US    | Problems of                           | 1,426 inhabitants aged    | Mean age =       |      |                               | Severe: 2.22 ± 0.05                |
| 13 | (1999) <sup>25</sup> | sectional |       | Everyday Living                       | 25 to 74 years (741       | 48.9 (standard   |      | Age, gender, and levels of    | From analysis of covariance        |
| 14 |                      |           |       | Scale of Pearlin and                  | women and 685 men)        | deviation =      |      |                               |                                    |
| 15 |                      |           |       | Schooler                              |                           | 13.9)            |      |                               |                                    |
| 16 |                      |           |       | Severity of Alveolar Bone Loss        |                           | 52.0%            |      |                               | Job strain score among Alveolar    |
| 17 |                      |           |       | Healthy (0.4 to 1.9 mm alveolar       |                           |                  |      |                               | Bone Loss categories (mean ±       |
| 18 |                      |           |       | crestal height), low (2.0 to 2.9 mm), |                           |                  |      |                               | standard error)                    |
| 19 |                      |           |       | moderate (3.0 to 3.9 mm), and         |                           |                  |      |                               | Healthy: 2.12 ± 0.02               |
| 20 |                      |           |       | severe (≥4.0 mm)                      |                           |                  |      |                               | Low: 2.10 ± 0.03                   |
| 21 |                      |           |       |                                       |                           |                  |      |                               | Moderate: 2.09 ± 0.04              |
| 22 |                      |           |       |                                       |                           |                  |      |                               | Severe: 2.19 ± 0.04                |
| 23 |                      |           |       |                                       |                           |                  |      |                               | From analysis of covariance        |
| 24 |                      |           |       |                                       | 1,089 residents ranging   |                  |      | Age, gender, employment       |                                    |
| 25 | Akhter et al.        | Cross-    | Japan | Life events scale                     | in age from 18 to         | Mean age =       |      | status, smoking behavior,     | Job stress (reference: No): Odds   |
| 26 | (2005) <sup>26</sup> | sectional |       | (yes or no)                           | 96years of a farming      | 55.0 (standard   |      | stress within 1 month, self-  | ratio = 1.71 (95% confidence       |
| 27 |                      |           |       |                                       | village in the            | deviation = 1.7) |      | health-related stress, family | interval = 1.10, 2.67) from a      |
| 28 |                      |           |       |                                       | northernmost island of    | 51.2%            |      | health-related stress,        | logistic regression analysis       |
| 29 |                      |           |       |                                       | Japan (531 men and        |                  |      | frequency of dental           |                                    |
| 30 |                      |           |       |                                       | 558 women)                |                  |      | attendance, hyperlipidemia,   |                                    |
| 31 |                      |           |       |                                       |                           |                  |      | and diabetes mellitus         |                                    |
| 32 |                      |           |       |                                       |                           |                  |      |                               | The mean gingival index            |
| 33 |                      |           |       |                                       |                           |                  |      |                               | yes = 1.851 and no = 1.586 (p-     |
| 34 |                      |           |       |                                       |                           |                  |      |                               | value > 0.05)                      |
| 35 | Talib Bandar         | Cross-    | Iraq  | Life events scale                     | 64 patients of both       |                  |      |                               | Total mean percentage of sites     |
| 36 | (2009) <sup>27</sup> | sectional |       | (yes or no)                           | genders with ages         | Not reported     | None |                               | with probing pocket depth ≥ 4      |
| 37 |                      |           |       |                                       | ranging from 23 to 65     |                  |      |                               | mm                                 |
| 38 |                      |           |       |                                       | years                     |                  |      |                               | yes = 6.277% and no = 4.762%       |
| 39 |                      |           |       |                                       |                           |                  |      |                               | (p-values <0.05)                   |
| 40 |                      |           |       |                                       |                           |                  |      |                               | Total mean Bleeding On Probing     |
| 41 |                      |           |       |                                       |                           |                  |      |                               | yes = 41.534% and no =             |
| 42 |                      |           |       |                                       |                           |                  |      |                               | 32.137% (p-value > 0.05)           |
| 43 |                      |           |       |                                       |                           |                  |      |                               | The mean of the clinical           |

1  
2  
3  
4  
5  
6  
7  
8  
9  
10  
11  
12  
13  
14  
15  
16  
17  
18  
19  
20  
21  
22  
23  
24  
25  
26  
27  
28  
29  
30  
31  
32  
33  
34  
35  
36  
37  
38  
39  
40  
41  
42  
43  
44  
45  
46  
47

|                                      |                 |       |                                                                                                                                                                                                                                                 |                                                                                                                                                                                                                                                                                                                           |                                                                                                                                            |                                                                                                                                                      |                                                                                                                                                                         |                                                                                                                                                                                                                                      |                                                                                                                                                                                                                                                                                                                   |
|--------------------------------------|-----------------|-------|-------------------------------------------------------------------------------------------------------------------------------------------------------------------------------------------------------------------------------------------------|---------------------------------------------------------------------------------------------------------------------------------------------------------------------------------------------------------------------------------------------------------------------------------------------------------------------------|--------------------------------------------------------------------------------------------------------------------------------------------|------------------------------------------------------------------------------------------------------------------------------------------------------|-------------------------------------------------------------------------------------------------------------------------------------------------------------------------|--------------------------------------------------------------------------------------------------------------------------------------------------------------------------------------------------------------------------------------|-------------------------------------------------------------------------------------------------------------------------------------------------------------------------------------------------------------------------------------------------------------------------------------------------------------------|
|                                      |                 |       |                                                                                                                                                                                                                                                 |                                                                                                                                                                                                                                                                                                                           |                                                                                                                                            |                                                                                                                                                      |                                                                                                                                                                         |                                                                                                                                                                                                                                      | attachment level<br>yes = 2.837 and no = 2.275 (p-value > 0.05)<br>(p-values from t-test)<br>Mean Occupational Stress Index Score (standard deviation)<br>Control: 79.53 (23.57)<br>Test group 1: 133.68 (33.23)<br>Test group 2: 158.13 (32.44)<br>p-value <0.001<br>(p-values from ANOVA with the Scheffe Test) |
| Mahendra et al. (2011) <sup>28</sup> | Cross-sectional | India | An occupational stress index of Srivastava, A. K. and Singh, A. P.                                                                                                                                                                              | Control group (n=30): probing pocket depth (PPD) ≤ 3 mm<br>Test group 1 (n=40): at least four sites with probing pocket depth > 4mm and ≤ 6 mm<br>Test group 2 (n=30): at least four sites with probing pocket depth > 6mm                                                                                                | 110 police personnel aged 35-48 years with moderate or established periodontitis                                                           | Mean age was around 40 years.<br>Sex was not reported.                                                                                               | None                                                                                                                                                                    |                                                                                                                                                                                                                                      |                                                                                                                                                                                                                                                                                                                   |
| Ramji, (2011) <sup>29</sup>          | Cross-sectional | India | Self-reported job stress from one question (having or not)                                                                                                                                                                                      | Community Periodontal Index and Treatment Needs protocol (a tooth scored 3 or 4 indicating increased pocket depth of over 2 mm indicates presence of periodontitis)                                                                                                                                                       | 198 industrial labor full time workers from a small scale sector (SS) and 68 from a large scale sector (LS) between the age of 18-64 years | Age groups (SS [n=130], LS [n=68])<br>15-19 years 0%, 1%<br>20-29 years 38%, 60%<br>30-44 years 45%, 20%<br>45-64 years 17%, 19%<br>Sex was unknown. | None                                                                                                                                                                    | Having self-reported job stress: Odds ratio = 7.5 (95% confidence interval = 3.7, 15.02) from a logistic regression analysis                                                                                                         |                                                                                                                                                                                                                                                                                                                   |
| Islam et al. (2019) <sup>30</sup>    | Cross-sectional | Japan | Brief Job Stress Questionnaire developed by referring the demand-control-support model in Japan (low stress, High stress-High coping, and High stress-low coping)<br>*coping was assessed using a questionnaire developed by a Japanese company | No inflammation of the gingiva or redness and/or swelling of the interdental papilla without gingival recession was classified as non-periodontitis, and any redness and/or swelling in the gingiva with gingival recession and/or tooth mobility was classified as periodontitis, based on visual inspection by dentists | 738 workers of a Japanese crane manufacturing company (92 were women)                                                                      | Mean age = 40.7 (standard deviation = 10.5)<br>12.5%                                                                                                 | Age, gender, daily flossing, regular dental checkup, body mass index, sleeping duration, current smoker, daily alcohol drinking, monthly overtime work, and worker type | High stress-High coping: Odds ratio = 0.30 (95% confidence interval = 0.14, 0.66)<br>High stress-Low coping: Odds ratio = 2.79 (95% confidence interval = 1.05, 7.43) (reference: low stress)<br>From a logistic regression analysis |                                                                                                                                                                                                                                                                                                                   |

|    |                      |                 |       |                                                        |                                                                                   |                                                                                   |                                                         |                                                                                                                                                                                               |                                                                                                                                                                |
|----|----------------------|-----------------|-------|--------------------------------------------------------|-----------------------------------------------------------------------------------|-----------------------------------------------------------------------------------|---------------------------------------------------------|-----------------------------------------------------------------------------------------------------------------------------------------------------------------------------------------------|----------------------------------------------------------------------------------------------------------------------------------------------------------------|
| 1  |                      |                 |       | Karasek job strain model                               |                                                                                   |                                                                                   |                                                         |                                                                                                                                                                                               |                                                                                                                                                                |
| 2  | Hayashi et al.       | Cross-sectional | Japan | (high job demand and low control and other categories) | Tooth loss via oral examination ( $\geq 4$ teeth lost and $3 \leq$ teeth lost)    | 252 male workers employed at a manufacturing company aged 20–59 years             | Mean age = 38.7 (standard deviation = 11.0) 0%          | Age, type A behavior, alexythymia, depression, job satisfaction, and life satisfaction                                                                                                        | High job demand and low control: Odds ratio = 1.2 (95% confidence interval = 0.40, 3.42) from a logistic regression analysis (reference: other categories)     |
| 3  | (2001) <sup>31</sup> |                 |       |                                                        |                                                                                   |                                                                                   |                                                         |                                                                                                                                                                                               |                                                                                                                                                                |
| 4  |                      |                 |       |                                                        |                                                                                   |                                                                                   |                                                         |                                                                                                                                                                                               |                                                                                                                                                                |
| 5  |                      |                 |       |                                                        |                                                                                   |                                                                                   |                                                         |                                                                                                                                                                                               |                                                                                                                                                                |
| 6  |                      |                 |       |                                                        |                                                                                   |                                                                                   |                                                         |                                                                                                                                                                                               |                                                                                                                                                                |
| 7  |                      |                 |       |                                                        |                                                                                   |                                                                                   |                                                         |                                                                                                                                                                                               |                                                                                                                                                                |
| 8  | Sato et al.          | Cross-sectional | Japan | Effort-Reward Imbalance model (having or not)          | Self-reported tooth loss Having tooth loss or not (= no experience of tooth loss) | 1,195 employees aged 25–50 years old who work 20 h per week or more (women = 569) | Median age = 37 (1st and 3rd quartiles = 31 and 43) 48% | Age, sex, marital status, annual household income, years of education, employment status, occupation, working hours per week, job position, company size, body mass index, and smoking status | High effort-reward imbalance ratio: Prevalence ratio = 1.20 (95% confidence interval = 1.01, 1.42) from Poisson regression models with a robust error variance |
| 9  | (2020) <sup>32</sup> |                 |       |                                                        |                                                                                   |                                                                                   |                                                         |                                                                                                                                                                                               |                                                                                                                                                                |
| 10 |                      |                 |       |                                                        |                                                                                   |                                                                                   |                                                         |                                                                                                                                                                                               |                                                                                                                                                                |
| 11 |                      |                 |       |                                                        |                                                                                   |                                                                                   |                                                         |                                                                                                                                                                                               |                                                                                                                                                                |
| 12 |                      |                 |       |                                                        |                                                                                   |                                                                                   |                                                         |                                                                                                                                                                                               |                                                                                                                                                                |
| 13 |                      |                 |       |                                                        |                                                                                   |                                                                                   |                                                         |                                                                                                                                                                                               |                                                                                                                                                                |
| 14 |                      |                 |       |                                                        |                                                                                   |                                                                                   |                                                         |                                                                                                                                                                                               |                                                                                                                                                                |
| 15 |                      |                 |       |                                                        |                                                                                   |                                                                                   |                                                         |                                                                                                                                                                                               |                                                                                                                                                                |
| 16 |                      |                 |       |                                                        |                                                                                   |                                                                                   |                                                         |                                                                                                                                                                                               |                                                                                                                                                                |
| 17 |                      |                 |       |                                                        |                                                                                   |                                                                                   |                                                         |                                                                                                                                                                                               |                                                                                                                                                                |
| 18 |                      |                 |       |                                                        |                                                                                   |                                                                                   |                                                         |                                                                                                                                                                                               |                                                                                                                                                                |
| 19 |                      |                 |       |                                                        |                                                                                   |                                                                                   |                                                         |                                                                                                                                                                                               |                                                                                                                                                                |
| 20 |                      |                 |       |                                                        |                                                                                   |                                                                                   |                                                         |                                                                                                                                                                                               |                                                                                                                                                                |
| 21 |                      |                 |       |                                                        |                                                                                   |                                                                                   |                                                         |                                                                                                                                                                                               |                                                                                                                                                                |
| 22 |                      |                 |       |                                                        |                                                                                   |                                                                                   |                                                         |                                                                                                                                                                                               |                                                                                                                                                                |
| 23 |                      |                 |       |                                                        |                                                                                   |                                                                                   |                                                         |                                                                                                                                                                                               |                                                                                                                                                                |
| 24 |                      |                 |       |                                                        |                                                                                   |                                                                                   |                                                         |                                                                                                                                                                                               |                                                                                                                                                                |
| 25 |                      |                 |       |                                                        |                                                                                   |                                                                                   |                                                         |                                                                                                                                                                                               |                                                                                                                                                                |
| 26 |                      |                 |       |                                                        |                                                                                   |                                                                                   |                                                         |                                                                                                                                                                                               |                                                                                                                                                                |
| 27 |                      |                 |       |                                                        |                                                                                   |                                                                                   |                                                         |                                                                                                                                                                                               |                                                                                                                                                                |
| 28 |                      |                 |       |                                                        |                                                                                   |                                                                                   |                                                         |                                                                                                                                                                                               |                                                                                                                                                                |
| 29 |                      |                 |       |                                                        |                                                                                   |                                                                                   |                                                         |                                                                                                                                                                                               |                                                                                                                                                                |
| 30 |                      |                 |       |                                                        |                                                                                   |                                                                                   |                                                         |                                                                                                                                                                                               |                                                                                                                                                                |
| 31 |                      |                 |       |                                                        |                                                                                   |                                                                                   |                                                         |                                                                                                                                                                                               |                                                                                                                                                                |
| 32 |                      |                 |       |                                                        |                                                                                   |                                                                                   |                                                         |                                                                                                                                                                                               |                                                                                                                                                                |
| 33 |                      |                 |       |                                                        |                                                                                   |                                                                                   |                                                         |                                                                                                                                                                                               |                                                                                                                                                                |
| 34 |                      |                 |       |                                                        |                                                                                   |                                                                                   |                                                         |                                                                                                                                                                                               |                                                                                                                                                                |
| 35 |                      |                 |       |                                                        |                                                                                   |                                                                                   |                                                         |                                                                                                                                                                                               |                                                                                                                                                                |
| 36 |                      |                 |       |                                                        |                                                                                   |                                                                                   |                                                         |                                                                                                                                                                                               |                                                                                                                                                                |
| 37 |                      |                 |       |                                                        |                                                                                   |                                                                                   |                                                         |                                                                                                                                                                                               |                                                                                                                                                                |
| 38 |                      |                 |       |                                                        |                                                                                   |                                                                                   |                                                         |                                                                                                                                                                                               |                                                                                                                                                                |
| 39 |                      |                 |       |                                                        |                                                                                   |                                                                                   |                                                         |                                                                                                                                                                                               |                                                                                                                                                                |
| 40 |                      |                 |       |                                                        |                                                                                   |                                                                                   |                                                         |                                                                                                                                                                                               |                                                                                                                                                                |
| 41 |                      |                 |       |                                                        |                                                                                   |                                                                                   |                                                         |                                                                                                                                                                                               |                                                                                                                                                                |
| 42 |                      |                 |       |                                                        |                                                                                   |                                                                                   |                                                         |                                                                                                                                                                                               |                                                                                                                                                                |
| 43 |                      |                 |       |                                                        |                                                                                   |                                                                                   |                                                         |                                                                                                                                                                                               |                                                                                                                                                                |
| 44 |                      |                 |       |                                                        |                                                                                   |                                                                                   |                                                         |                                                                                                                                                                                               |                                                                                                                                                                |
| 45 |                      |                 |       |                                                        |                                                                                   |                                                                                   |                                                         |                                                                                                                                                                                               |                                                                                                                                                                |
| 46 |                      |                 |       |                                                        |                                                                                   |                                                                                   |                                                         |                                                                                                                                                                                               |                                                                                                                                                                |
| 47 |                      |                 |       |                                                        |                                                                                   |                                                                                   |                                                         |                                                                                                                                                                                               |                                                                                                                                                                |



Table 2. Quality assessment of included studies

|                                           | Q1  | Q2  | Q3  | Q4  | Q5  | Q6 | Q7 | Q8  | Q9  | Q10 | Q11 | Q12 | Q13 | Q14 | Quality Rating (Good, Fair, or Poor) |
|-------------------------------------------|-----|-----|-----|-----|-----|----|----|-----|-----|-----|-----|-----|-----|-----|--------------------------------------|
| Marcenes and Sheiham (1992) <sup>22</sup> | Yes | Yes | NR  | Yes | Yes | No | No | Yes | Yes | No  | Yes | Yes | NA  | Yes | Fair                                 |
| Freeman and Goss (1993) <sup>23</sup>     | Yes | Yes | NR  | No  | Yes | No | No | Yes | Yes | No  | Yes | Yes | NA  | No  | Poor                                 |
| Linden et al. (1996) <sup>24</sup>        | Yes | Yes | NR  | Yes | Yes | No | No | Yes | Yes | No  | Yes | Yes | NA  | No  | Poor                                 |
| Genco et al. (1999) <sup>25</sup>         | Yes | Yes | NR  | No  | Yes | No | No | Yes | No  | No  | Yes | Yes | NA  | No  | Poor                                 |
| Akhter et al. (2005) <sup>26</sup>        | Yes | Yes | NR  | No  | Yes | No | No | NA  | No  | No  | Yes | Yes | NA  | No  | Poor                                 |
| Talib Bandar (2009) <sup>27</sup>         | Yes | Yes | NR  | No  | No  | No | No | NA  | No  | No  | Yes | Yes | NA  | No  | Poor                                 |
| Mahendra et al. (2011) <sup>28</sup>      | Yes | Yes | NR  | Yes | Yes | No | No | NA  | Yes | No  | Yes | Yes | NA  | No  | Poor                                 |
| Ramji (2011) <sup>29</sup>                | Yes | Yes | No  | Yes | Yes | No | No | NA  | No  | No  | Yes | Yes | NA  | No  | Poor                                 |
| Islam et al. (2019) <sup>30</sup>         | Yes | Yes | NR  | Yes | Yes | No | No | NA  | No  | No  | Yes | Yes | NA  | No  | Poor                                 |
| Hayashi et al. (2001) <sup>31</sup>       | Yes | Yes | Yes | Yes | Yes | No | No | NA  | Yes | No  | Yes | Yes | NA  | No  | Fair                                 |
| Sato et al. (2020) <sup>32</sup>          | Yes | Yes | No  | Yes | Yes | No | No | NA  | Yes | No  | Yes | No  | NA  | Yes | Fair                                 |

Q1. Was the research question or objective in this paper clearly stated?

Q2. Was the study population clearly specified and defined?

Q3. Was the participation rate of eligible persons at least 50%?

Q4. Were all the subjects selected or recruited from the same or similar populations (including the same time period)? Were inclusion and exclusion criteria for being in the study prespecified and applied uniformly to all participants?

Q5. Was a sample size justification, power description, or variance and effect estimates provided?

Q6. For the analyses in this paper, were the exposure(s) of interest measured prior to the outcome(s) being measured?

Q7. Was the timeframe sufficient so that one could reasonably expect to see an association between exposure and outcome if it existed?

Q8. For exposures that can vary in amount or level, did the study examine different levels of the exposure as related to the outcome (e.g., categories of

1 exposure, or exposure measured as continuous variable)?

2  
3 Q9. Were the exposure measures (independent variables) clearly defined, valid, reliable, and implemented consistently across all study participants?

4  
5 Q10. Was the exposure(s) assessed more than once over time?

6  
7 Q11. Were the outcome measures (dependent variables) clearly defined, valid, reliable, and implemented consistently across all study participants?

8  
9 Q12. Were the outcome assessors blinded to the exposure status of participants?

10  
11 Q13. Was loss to follow-up after baseline 20% or less?

12  
13 Q14. Were key potential confounding variables measured and adjusted statistically for their impact on the relationship between exposure(s) and  
14  
15 outcome(s)?

16  
17 Abbreviation: CD, cannot determine; NA, not applicable; NR, not reported

1  
2  
3  
4  
5  
6  
7  
8  
9  
10  
11  
12  
13  
14  
15  
16  
17  
18  
19  
20  
21  
22  
23  
24  
25

The search of two databases (PubMed and Scopus) on July 7, 2020 identified 402 records

129 duplicated records were removed

The titles and abstracts of 273 records were screened

Three additional records were identified through other sources (reference lists and hand search)

Full text assessment of 14 articles were performed

Excluded articles after full-text assessment (n=3; Retracted [n=1] and used composite outcome [n=2])

Finally, 11 articles were included (n=1, caries and periodontal status; n=8, periodontal status; n=2, tooth loss)

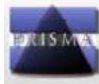

# PRISMA 2009 Checklist

1  
2  
3  
4  
5  
6  
7  
8  
9  
10  
11  
12  
13  
14  
15  
16  
17  
18  
19  
20  
21  
22  
23  
24  
25  
26  
27  
28  
29  
30  
31  
32  
33  
34  
35  
36  
37  
38  
39  
40  
41  
42  
43  
44  
45  
46  
47

| Section/topic                      | #  | Checklist item                                                                                                                                                                                                                                                                                              | Reported on page # |
|------------------------------------|----|-------------------------------------------------------------------------------------------------------------------------------------------------------------------------------------------------------------------------------------------------------------------------------------------------------------|--------------------|
| <b>TITLE</b>                       |    |                                                                                                                                                                                                                                                                                                             |                    |
| Title                              | 1  | Identify the report as a systematic review, meta-analysis, or both.                                                                                                                                                                                                                                         | p1                 |
| <b>ABSTRACT</b>                    |    |                                                                                                                                                                                                                                                                                                             |                    |
| Structured summary                 | 2  | Provide a structured summary including, as applicable: background; objectives; data sources; study eligibility criteria, participants, and interventions; study appraisal and synthesis methods; results; limitations; conclusions and implications of key findings; systematic review registration number. | p2                 |
| <b>INTRODUCTION</b>                |    |                                                                                                                                                                                                                                                                                                             |                    |
| Rationale                          | 3  | Describe the rationale for the review in the context of what is already known.                                                                                                                                                                                                                              | p5, 6              |
| Objectives                         | 4  | Provide an explicit statement of questions being addressed with reference to participants, interventions, comparisons, outcomes, and study design (PICOS).                                                                                                                                                  | p6                 |
| <b>METHODS</b>                     |    |                                                                                                                                                                                                                                                                                                             |                    |
| Protocol and registration          | 5  | Indicate if a review protocol exists, if and where it can be accessed (e.g., Web address), and, if available, provide registration information including registration number.                                                                                                                               | Not applicable     |
| Eligibility criteria               | 6  | Specify study characteristics (e.g., PICOS, length of follow-up) and report characteristics (e.g., years considered, language, publication status) used as criteria for eligibility, giving rationale.                                                                                                      | p6                 |
| Information sources                | 7  | Describe all information sources (e.g., databases with dates of coverage, contact with study authors to identify additional studies) in the search and date last searched.                                                                                                                                  | p6                 |
| Search                             | 8  | Present full electronic search strategy for at least one database, including any limits used, such that it could be repeated.                                                                                                                                                                               | p6                 |
| Study selection                    | 9  | State the process for selecting studies (i.e., screening, eligibility, included in systematic review, and, if applicable, included in the meta-analysis).                                                                                                                                                   | p6                 |
| Data collection process            | 10 | Describe method of data extraction from reports (e.g., piloted forms, independently, in duplicate) and any processes for obtaining and confirming data from investigators.                                                                                                                                  | p7                 |
| Data items                         | 11 | List and define all variables for which data were sought (e.g., PICOS, funding sources) and any assumptions and simplifications made.                                                                                                                                                                       | p7                 |
| Risk of bias in individual studies | 12 | Describe methods used for assessing risk of bias of individual studies (including specification of whether this was done at the study or outcome level), and how this information is to be used in any data synthesis.                                                                                      | p7                 |
| Summary measures                   | 13 | State the principal summary measures (e.g., risk ratio, difference in means).                                                                                                                                                                                                                               | Not applicable     |

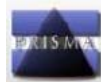

# PRISMA 2009 Checklist

Page 1 of 2

| Synthesis of results                                                                                                                       | 14 | Describe the methods of handling data and combining results of studies, if done, including measures of consistency (e.g., $I^2$ ) for each meta-analysis.                                                | Not applicable     |
|--------------------------------------------------------------------------------------------------------------------------------------------|----|----------------------------------------------------------------------------------------------------------------------------------------------------------------------------------------------------------|--------------------|
| Page 1 of 2                                                                                                                                |    |                                                                                                                                                                                                          |                    |
| Section/topic                                                                                                                              | #  | Checklist item                                                                                                                                                                                           | Reported on page # |
| Risk of bias across studies                                                                                                                | 15 | Specify any assessment of risk of bias that may affect the cumulative evidence (e.g., publication bias, selective reporting within studies).                                                             | Not applicable     |
| Additional analyses                                                                                                                        | 16 | Describe methods of additional analyses (e.g., sensitivity or subgroup analyses, meta-regression), if done, indicating which were pre-specified.                                                         | Not applicable     |
| <b>RESULTS</b>                                                                                                                             |    |                                                                                                                                                                                                          |                    |
| Study selection                                                                                                                            | 17 | Give numbers of studies screened, assessed for eligibility, and included in the review, with reasons for exclusions at each stage, ideally with a flow diagram.                                          | p7                 |
| Study characteristics                                                                                                                      | 18 | For each study, present characteristics for which data were extracted (e.g., study size, PICOS, follow-up period) and provide the citations.                                                             | p8, 9              |
| Risk of bias within studies                                                                                                                | 19 | Present data on risk of bias of each study and, if available, any outcome level assessment (see item 12).                                                                                                | p9                 |
| Results of individual studies                                                                                                              | 20 | For all outcomes considered (benefits or harms), present, for each study: (a) simple summary data for each intervention group (b) effect estimates and confidence intervals, ideally with a forest plot. | p9                 |
| Synthesis of results                                                                                                                       | 21 | Present results of each meta-analysis done, including confidence intervals and measures of consistency.                                                                                                  | Not applicable     |
| Risk of bias across studies                                                                                                                | 22 | Present results of any assessment of risk of bias across studies (see Item 15).                                                                                                                          | Not applicable     |
| Additional analysis                                                                                                                        | 23 | Give results of additional analyses, if done (e.g., sensitivity or subgroup analyses, meta-regression [see Item 16]).                                                                                    | Not applicable     |
| <b>DISCUSSION</b>                                                                                                                          |    |                                                                                                                                                                                                          |                    |
| Summary of evidence                                                                                                                        | 24 | Summarize the main findings including the strength of evidence for each main outcome; consider their relevance to key groups (e.g., healthcare providers, users, and policy makers).                     | p9, 10             |
| Limitations                                                                                                                                | 25 | Discuss limitations at study and outcome level (e.g., risk of bias), and at review-level (e.g., incomplete retrieval of identified research, reporting bias).                                            | p10,11, 12         |
| Conclusions                                                                                                                                | 26 | Provide a general interpretation of the results in the context of other evidence, and implications for future research.                                                                                  | p10,11, 12         |
| <b>FUNDING</b>                                                                                                                             |    |                                                                                                                                                                                                          |                    |
| For peer review only - <a href="http://bmjopen.bmj.com/site/about/guidelines.xhtml">http://bmjopen.bmj.com/site/about/guidelines.xhtml</a> |    |                                                                                                                                                                                                          |                    |

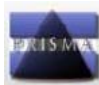

# PRISMA 2009 Checklist

1  
2  
3  
4  
5  
6  
7  
8  
9  
10  
11  
12  
13  
14  
15  
16  
17  
18  
19  
20  
21  
22  
23  
24  
25  
26  
27  
28  
29  
30  
31  
32  
33  
34  
35  
36  
37  
38  
39  
40  
41  
42  
43  
44  
45  
46  
47

|         |    |                                                                                                                                            |     |
|---------|----|--------------------------------------------------------------------------------------------------------------------------------------------|-----|
| Funding | 27 | Describe sources of funding for the systematic review and other support (e.g., supply of data); role of funders for the systematic review. | p13 |
|---------|----|--------------------------------------------------------------------------------------------------------------------------------------------|-----|

From: Moher D, Liberati A, Tetzlaff J, Altman DG, The PRISMA Group (2009). Preferred Reporting Items for Systematic Reviews and Meta-Analyses: The PRISMA Statement. PLoS Med 6(7): e1000097. doi:10.1371/journal.pmed1000097

For more information, visit: [www.prisma-statement.org](http://www.prisma-statement.org).

Page 2 of 2

For peer review only

# BMJ Open

## Work stress and oral conditions: A systematic review of observational studies

|                                 |                                                                                                                                                                                                                                                                                                                                                                                |
|---------------------------------|--------------------------------------------------------------------------------------------------------------------------------------------------------------------------------------------------------------------------------------------------------------------------------------------------------------------------------------------------------------------------------|
| Journal:                        | <i>BMJ Open</i>                                                                                                                                                                                                                                                                                                                                                                |
| Manuscript ID                   | bmjopen-2020-046532.R1                                                                                                                                                                                                                                                                                                                                                         |
| Article Type:                   | Original research                                                                                                                                                                                                                                                                                                                                                              |
| Date Submitted by the Author:   | 24-Mar-2021                                                                                                                                                                                                                                                                                                                                                                    |
| Complete List of Authors:       | Sato, Yukihiro; Asahikawa Medical University, Division of Public Health and Epidemiology, Department of Social Medicine<br>Saijo, Yasuaki; Asahikawa Medical University, Division of Public Health and Epidemiology, Department of Social Medicine<br>Yoshioka, Eiji ; Asahikawa Medical University, Division of Public Health and Epidemiology, Department of Social Medicine |
| <b>Primary Subject Heading</b>: | Occupational and environmental medicine                                                                                                                                                                                                                                                                                                                                        |
| Secondary Subject Heading:      | Dentistry and oral medicine                                                                                                                                                                                                                                                                                                                                                    |
| Keywords:                       | OCCUPATIONAL & INDUSTRIAL MEDICINE, SOCIAL MEDICINE, EPIDEMIOLOGY                                                                                                                                                                                                                                                                                                              |
|                                 |                                                                                                                                                                                                                                                                                                                                                                                |

SCHOLARONE™  
Manuscripts

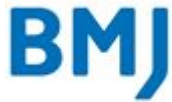

I, the Submitting Author has the right to grant and does grant on behalf of all authors of the Work (as defined in the below author licence), an exclusive licence and/or a non-exclusive licence for contributions from authors who are: i) UK Crown employees; ii) where BMJ has agreed a CC-BY licence shall apply, and/or iii) in accordance with the terms applicable for US Federal Government officers or employees acting as part of their official duties; on a worldwide, perpetual, irrevocable, royalty-free basis to BMJ Publishing Group Ltd ("BMJ") its licensees and where the relevant Journal is co-owned by BMJ to the co-owners of the Journal, to publish the Work in this journal and any other BMJ products and to exploit all rights, as set out in our [licence](#).

The Submitting Author accepts and understands that any supply made under these terms is made by BMJ to the Submitting Author unless you are acting as an employee on behalf of your employer or a postgraduate student of an affiliated institution which is paying any applicable article publishing charge ("APC") for Open Access articles. Where the Submitting Author wishes to make the Work available on an Open Access basis (and intends to pay the relevant APC), the terms of reuse of such Open Access shall be governed by a Creative Commons licence – details of these licences and which [Creative Commons](#) licence will apply to this Work are set out in our licence referred to above.

Other than as permitted in any relevant BMJ Author's Self Archiving Policies, I confirm this Work has not been accepted for publication elsewhere, is not being considered for publication elsewhere and does not duplicate material already published. I confirm all authors consent to publication of this Work and authorise the granting of this licence.



**Title**

Work stress and oral conditions: A systematic review of observational studies

**Authors**

Yukihiro Sato, DDS, PhD, 1 E-mail: yukihiro.sato@epidemiology.work

Yasuaki Saijo, MD, PhD, 1, E-mail: y-saijo@asahikawa-med.ac.jp

Eiji Yoshioka, MD, PhD, 1, E-mail: e-yoshi@asahikawa-med.ac.jp

1. Division of Public Health and Epidemiology, Department of Social Medicine, Asahikawa Medical University, Japan

**Corresponding Author**

Yukihiro Sato, D.D.S., Ph.D

E-mail: yukihiro.sato@epidemiology.work

Assistant Professor

Division of Public Health and Epidemiology, Department of Social Medicine, Asahikawa Medical University

078-8510, 1-1-1, Midorigaoka higashi2-jo, Asahikawa-shi, Hokkaido, Japan

TEL: +81 166-68-2404

FAX: +81 166-68-2409

**Word count (excluding title page, abstract, references, figures and tables)**

2,881 words

1  
2  
3  
4  
5  
6  
7  
8  
9  
10  
11  
12  
13  
14  
15  
16  
17  
18  
19  
20  
21  
22  
23  
24  
25  
26  
27  
28  
29  
30  
31  
32  
33  
34  
35  
36  
37  
38  
39  
40  
41  
42  
43  
44  
45  
46  
47  
48  
49  
50  
51  
52  
53  
54  
55  
56  
57  
58  
59  
60

## 1 **Abstract (300/300)**

2 **Objectives:** Although psychological stress is a risk factor for oral diseases, there seems to be  
3 no review on work stress. This study aimed to review the evidence on the association between  
4 work stress and oral conditions, including dental caries, periodontal status, and tooth loss.

5 **Design:** A systematic review of published observational studies.

6 **Data sources:** A systematic literature search was conducted in PubMed and Scopus  
7 databases on August 12, 2020.

8 **Study selection:** Articles were screened based on the following inclusion criteria: published  
9 after 1966; in English only; epidemiological studies on humans (except case studies, reviews,  
10 letters, commentaries, and editorials); and examined the association of work stress with  
11 dental caries, periodontal status, and tooth loss.

12 **Data extraction:** Data was extracted from eligible studies. A quality assessment was  
13 conducted using the Quality Assessment Tool for Observational Cohort and Cross-Sectional  
14 Studies.

15 **Results:** Of 402 articles identified, 11 met the inclusion criteria, and one study assessed the  
16 association of work stress with dental caries and periodontal status. Of 11 studies, one  
17 reported a nonsignificant association between work stress and dental caries; eight of nine  
18 studies reported a significant association between work stress and worse periodontal status;  
19 and one of two studies reported a significant association between work stress and tooth loss.  
20 Nine of eleven studies were cross-sectional, while the remaining two studies had unclear  
21 methodology. Only two studies were sufficiently adjusted for potential confounders. Eight  
22 studies assessed work stress but did not use the current major measures. Three studies were  
23 rated as fair, while eight studies had poor quality.

24 **Conclusions:** There is a lack of evidence on the association of work stress with dental caries  
25 and tooth loss. Eight studies suggested potential associations between periodontal status and

1  
2  
3  
4  
5  
6 26 work stress. Cohort studies using the major work stress measures and adjusting for the  
7  
8 27 potential confounders are needed.  
9

10 28

11  
12 29 **Keywords**

13  
14 30 systematic review, work stress, job stress, occupational stress, oral health, oral diseases  
15  
16  
17  
18  
19  
20  
21  
22  
23  
24  
25  
26  
27  
28  
29  
30  
31  
32  
33  
34  
35  
36  
37  
38  
39  
40  
41  
42  
43  
44  
45  
46  
47  
48  
49  
50  
51  
52  
53  
54  
55  
56  
57  
58  
59  
60

For peer review only

1  
2  
3  
4  
5  
6 31 **Strengths and limitations of this study**  
7

8 32 ► This is the first systematic review to evaluate and summarise the literature on the  
9  
10 33 association between work stress and oral conditions, including dental caries, periodontal  
11  
12 34 status, and tooth loss.

13  
14 35 ► This systematic review provides a comprehensive insight into the quality of the included  
15  
16 36 papers.

17  
18 37 ► The systematic literature search, screening, and quality assessments were conducted by  
19  
20 38 only one investigator.

21  
22 39 ► A meta-analysis could not be conducted because of the heterogeneity of work stress  
23  
24 40 measures and outcome definitions.  
25  
26  
27  
28  
29  
30  
31  
32  
33  
34  
35  
36  
37  
38  
39  
40  
41  
42  
43  
44  
45  
46  
47  
48  
49  
50  
51  
52  
53  
54  
55  
56  
57  
58  
59  
60

## 41 INTRODUCTION

42 Oral diseases, such as dental caries and periodontal disease, are a major health concern  
43 worldwide. The Global Burden of Disease study has estimated that 2.3 billion individuals  
44 had untreated dental caries, 796 million had severe periodontal disease, and 267 million had  
45 a complete loss of natural teeth in 2017.<sup>1</sup> Dental caries is the destruction of dental hard tissues  
46 in the crowns and roots of the teeth.<sup>2</sup> Periodontal diseases are chronic inflammatory  
47 conditions with disorders of the tissues surrounding and supporting the teeth.<sup>3</sup> Tooth loss is  
48 mainly the consequence of dental caries and periodontal disease.<sup>2,3</sup> Because oral diseases  
49 result in severe toothache and eating, sleeping, and communication disabilities,<sup>4,5</sup> poor oral  
50 conditions can restrict work performance<sup>4,5</sup> and create a significant economic burden.<sup>6</sup> Indeed,  
51 work productivity loss due to oral conditions is estimated at 187.61 billion US dollars  
52 annually.<sup>6</sup> The necessity of preventing oral diseases for working adults is highlighted.

53 Since the 1990s, rapid changes in the global economy and the diverse markets have  
54 occurred, and psychological workplace stress has become more prevalent and severe,  
55 especially among industrialised countries.<sup>7</sup> Indeed, Kivimäki et al. reported a 15% prevalence  
56 of job strain measured using job-content and demand-control questionnaires from 13  
57 European cohorts' data (1985–2006).<sup>8</sup> Besides, work stress can have profound effects on  
58 health. There is accumulating evidence of the risk of work stress on cancer, cardiovascular  
59 diseases, diabetes, and depression.<sup>9,10</sup> Béjean and Sultan-Taïeb estimated that the work-  
60 related stress costs due to illnesses could range between €1,167 million and €1,975 million  
61 in France in 2000.<sup>11</sup> Work stress affects workers' health and productivity.

62 Psychological stress is recognised as a risk factor for dental caries and periodontal  
63 diseases. Psychological stress is related to oral diseases through immune system dysfunction,  
64 increased stress hormones, cariogenic bacterial counts, and poor oral health behaviours.<sup>12,13</sup>  
65 Work stress is strongly linked with psychological and physical health.<sup>9,10</sup> Previous systematic

1  
2  
3  
4  
5  
6 66 reviews suggested potential associations of psychological stress with dental caries and  
7  
8 67 periodontitis.<sup>14,15</sup> However, there seems to be no review on the association between work  
9  
10 68 stress and oral diseases. Today, work stress has become an increasingly serious problem.  
11  
12 69 Besides, the number of women in the workforce and dual-earner families have been  
13  
14 70 increasing.<sup>16</sup> A wide range of populations can suffer the risk of oral diseases from exposure  
15  
16 71 to work stress. Thus, the aim of this systematic review was to evaluate and summarise the  
17  
18 72 literature on the association between work stress and oral conditions, including dental caries,  
19  
20 73 periodontal status, and tooth loss. We set the following review question: Is work stress  
21  
22 74 associated with dental caries, periodontal status, and tooth loss among working adults?  
23  
24  
25

## 76 **METHODS**

26  
27  
28 77 The reporting of this systematic review conforms to the Preferred Reporting Items for  
29  
30 78 Systematic Reviews and Meta-Analyses (PRISMA) guidelines.<sup>17,18</sup> We also followed the  
31  
32 79 Conducting Systematic Reviews and Meta-Analyses of Observational Studies of Etiology  
33  
34 80 (COSMOS-E) guidance<sup>19</sup> and the reporting of Meta-analysis Of Observational Studies in  
35  
36 81 Epidemiology (MOOSE).<sup>20</sup> The protocol of this systematic review was not registered.

### 38 **Eligibility criteria**

39  
40 83 Published studies were eligible if they: 1) were published in English; 2) were epidemiological  
41  
42 84 studies on humans (except case studies, reviews, letters, commentaries, and editorials); and  
43  
44 85 3) examined the association of work stress with dental caries, periodontal status, and tooth  
45  
46 86 loss.

### 48 **Information sources and searches**

49  
50 88 On August 12, 2020, we identified potentially relevant published studies in PubMed (1966  
51  
52 89 to August 12, 2020) and Scopus (1966 to August 12, 2020) databases. As PubMed and  
53  
54 90 Scopus have only data back to 1966, we focused on articles published after 1966. We used  
55  
56  
57

1  
2  
3  
4  
5  
6 91 the following script to obtain a wide range of literature: ("job strain" OR "effort reward")  
7  
8 92 AND (dental OR oral); ("job stress" OR "work stress" OR "occupational stress") AND  
9  
10 93 (dental OR oral). The details of the search strategies for each database are shown in  
11  
12 94 Supplemental Table 1. Besides, we manually hand-searched for potentially suitable studies  
13  
14 95 through the reference lists of identified articles and Google scholar. After excluding duplicate  
15  
16 96 articles, one author (YuS) assessed the titles and abstracts according to the aforementioned  
17  
18 97 criteria. Then, eligible studies were selected for the full-text review.

#### 98 **Data extraction**

99 The author (YuS) extracted the following information from each eligible study: 1) name of  
100 the first author; 2) study design; 3) study location (country); 4) number of participants and  
101 work-related characteristics; 5) exposure and its measurements; 6) outcome and its  
102 measurements; 7) age range and proportion of women; 8) covariates included in the adjusted  
103 models; and 9) the main results. The results were shown in Table 1.

#### 104 **Quality assessment**

105 We used the Quality Assessment Tool for Observational Cohort and Cross-Sectional Studies  
106 to assess the quality of included studies.<sup>21</sup> This tool includes 14 questions for evaluating the  
107 internal validity of a study. For each question, the author (YuS) rated them as yes, no, or  
108 other (including cannot determine, not reported, and not applicable). The overall quality  
109 rating for the study was regarded as good if all the domains were assessed favourably. Each  
110 document of the question was shown in the footnote of Table 2.

#### 111 **Synthesis of results**

112 A meta-analysis could not be conducted because of the heterogeneity of work stress measures  
113 and outcome definitions.

#### 114 **Patient and public involvement**

115 No patient involved.

116

## 117 RESULTS

118 Figure 1 presents the flow diagram of information through the phases of the systematic  
119 review. Of the 402 articles identified in PubMed and Scopus databases, 129 duplicated  
120 articles were removed, the titles and abstracts of 273 were screened, and 11 met the eligibility  
121 criteria. Three more articles identified through reference lists and hand-search were added.  
122 After full-text assessments of 14 articles, three were excluded due to retraction (n=1)<sup>22</sup> and  
123 the use of composite outcomes including dental caries and periodontal status (n=2).<sup>23,24</sup>  
124 Finally, 11 articles were included in this systematic review.<sup>25-35</sup>

### 125 Study characteristics of individual studies

126 Table 1 shows the 12 summaries from the 11 studies. One of eleven studies reported on dental  
127 caries and periodontal status,<sup>25</sup> eight reported on periodontal status,<sup>26-33</sup> and two reported on  
128 tooth loss.<sup>34,35</sup> Three studies were conducted in Japan,<sup>29,33-35</sup> two in India,<sup>31,32</sup> and one each  
129 in the UK,<sup>27</sup> the US,<sup>28</sup> Brazil,<sup>25</sup> and Iraq.<sup>30</sup> One study did not report on the study location.<sup>27</sup>  
130 The sample size varied from 18 to 1,426 among included studies. In one study, working status  
131 was not reported.<sup>28</sup> One study included employed and unemployed participants.<sup>29</sup> Two  
132 studies did not include women,<sup>25,34</sup> and three did not report on sex.<sup>30-32</sup>

133 Three studies assessed work stress using the current major measures (Job Demand-  
134 Control Model and Effort-Reward Imbalance Model).<sup>25,34,35</sup> Work stress was assessed using  
135 the Karasek job strain model,<sup>25,34</sup> the Effort-Reward Imbalance model,<sup>35</sup> the Brief Job Stress  
136 Questionnaire developed by referring to the demand-control-support model in Japan,<sup>33</sup> a self-  
137 reported job stress,<sup>32</sup> the Occupational Stress Indicator,<sup>26,27</sup> an occupational stress index by  
138 Srivastava and Singh,<sup>31</sup> the Life events scale,<sup>29,30</sup> and the Problems of Everyday Living Scale  
139 by Pearlin and Schooler.<sup>28</sup>

140 Three studies presented only descriptive statistics.<sup>28,30,31</sup> Eight studies performed



1  
2  
3  
4  
5  
6 141 regression analyses;<sup>25–27,29,32–35</sup> but two of the eight studies did not report the types of a  
7  
8 142 regression modeling used.<sup>26,27</sup> Only two studies sufficiently adjusted for potential  
9  
10 143 confounders such as socioeconomic status and work-related variables.<sup>25,35</sup>

#### 144 **Dental caries and work stress**

145 One study reported the cross-sectional association between work stress and dental caries,  
146 which included 164 paid male workers aged 35 to 44 years in Brazil.<sup>25</sup> Work stress was  
147 assessed according to the Karasek job strain model.<sup>36</sup> Dental caries status was assessed using  
148 the DMFS index (the number of decayed [D], missing [M], and filled [F] teeth surfaces per  
149 person). After adjusting for covariates, one-point increases in the work mental demand, work  
150 control, and work variety scores were associated with 0.19 (95% confidence interval [CI] =  
151 -0.91, 1.29), 0.87 (95% CI = -0.18, 1.91), and -0.06 (95% CI = -1.57, 1.45) increases in the  
152 DMFS index, respectively, in a multivariable regression analysis. Consequently, this study  
153 reported a nonsignificant association between work stress and dental caries.<sup>25</sup>

#### 154 **Periodontal status and work stress**

155 Eight of nine studies reported a significant association between work stress and worse  
156 periodontal status.<sup>25–33</sup> The measurements of periodontal status varied across the included  
157 studies. The measurements included probing pocket depth,<sup>26,30,31</sup> clinical attachment  
158 level,<sup>27,28,30</sup> alveolar bone loss,<sup>28</sup> gingival index,<sup>30</sup> bleeding on probing,<sup>30</sup> the Community  
159 Periodontal Index and Treatment Needs protocol,<sup>32</sup> and a composite outcome, including these  
160 measures.<sup>25,33</sup> Eight studies assessed periodontal status based on oral examination with probe,  
161 but one study was based on only visual inspection by dentists.<sup>33</sup>

162 Among the nine studies, two studies had unclear methodology; therefore, they were  
163 categorised as unknown.<sup>26,27</sup> Freeman and Goss assessed work stress and periodontal status  
164 over a 12-month period.<sup>26</sup> However, they did not clearly report when work stress and  
165 periodontal status variables were assessed and how they were used in the statistical models.

1  
2  
3  
4  
5  
6 166 Linden et al. followed-up patients for 5.5 years, but work stress was only assessed at the  
7  
8 167 follow-up examination, not at the baseline survey.<sup>27</sup>  
9

10 168 Among the remaining seven studies, after excluding the above two studies, three  
11  
12 169 studies presented only descriptive statistics.<sup>28,30,31</sup> The remaining four papers reported  
13  
14 170 significant associations following regression analyses.<sup>25,29,32,33</sup> However, Akhter et al. used  
15  
16 171 general stress questions not specific to work stress and included nonworking adults.<sup>29</sup> Islam  
17  
18 172 et al. used the Brief Job Stress Questionnaire derived from the demand-control-support model  
19  
20 173 in Japan, and periodontal status was assessed based on the visual inspection by dentists.<sup>33</sup>  
21  
22 174 Important potential confounders such as socioeconomic status and work-related variables,  
23  
24 175 were not included. Ramji assessed work stress using a single job stress question and did not  
25  
26 176 adjust for covariates in the statistical models.<sup>32</sup> Marcenes and Sheiham reported a significant  
27  
28 177 association between periodontal status and work stress.<sup>25</sup> Periodontal status was assessed by  
29  
30 178 the presence or absence of gums bleeding on probing or with pockets. The authors divided  
31  
32 179 periodontal measures into groups based on “complete absence of teeth with gums bleeding  
33  
34 180 on probing and with pockets,” or “the presence of any tooth with gums bleeding on probing  
35  
36 181 or pockets,” and defined the latter as those with periodontal disease. After adjusting for  
37  
38 182 covariates, one-point increases in work mental demand scores, work control scores, and work  
39  
40 183 variety scores were associated with ORs of 1.22 (95%CI = 1.06, 1.37), 0.97 (95%CI = 0.88,  
41  
42 184 1.07), and 0.99 (95%CI = 0.85, 1.16), respectively, for having periodontal disease, in a  
43  
44 185 logistic regression model.

#### 45 46 186 **Tooth loss and work stress**

47  
48 187 Two studies on the association between work stress and tooth loss were identified. One of  
49  
50 188 the two reported a significant association between work stress and tooth loss.<sup>34,35</sup> Hayashi et  
51  
52 189 al. reported the association between work stress, assessed using the Karasek job strain model,  
53  
54 190 and tooth loss.<sup>34</sup> A total of 322 male workers employed at a manufacturing company were  
55  
56  
57

1  
2  
3  
4  
5  
6 191 included. They dichotomised the number of tooth loss into  $\leq 3$  and  $\geq 4$ . After adjusting for  
7  
8 192 covariates, high job demand and low control conditions were associated with high odds of  
9  
10 193 having  $\geq 4$  teeth loss but not significant (OR = 1.2 [95% CI = 0.40, 3.42]). This study did not  
11  
12 194 adjust for the important potential confounders such as socioeconomic status and work-related  
13  
14 195 variables. Sato et al. reported the association between work stress, assessed using the effort-  
15  
16 196 reward imbalance model, and self-reported tooth loss.<sup>35</sup> After adjusting for covariates  
17  
18 197 including socioeconomic status and work-related variables, a high effort-reward imbalance  
19  
20 198 ratio was significantly associated with a high prevalence of  $\geq 1$  tooth loss (prevalence ratio =  
21  
22 199 1.20 [95% CI = 1.01, 1.42]).

#### 24 200 **Study quality**

26 201 Table 2 presents the results of the quality assessments for each study. Eight studies (73%)  
27  
28 202 had poor quality, while three (27%) were rated as fair. None of the studies addressed question  
29  
30 203 6 (“For the analyses in this paper, were the exposure(s) of interest measured prior to the  
31  
32 204 outcome(s) being measured?”); 7 (“Was the timeframe sufficient so that one could  
33  
34 205 reasonably expect to see an association between exposure and outcome if it existed?”); and  
35  
36 206 10 (“Was the exposure(s) assessed more than once over time?”); because all the studies were  
37  
38 207 cross-sectional or the study design was unclear.

40 208

#### 42 209 **DISCUSSION**

44 210 This is the first systematic review to evaluate and summarise the existing literature on the  
45  
46 211 associations between work stress and oral conditions. As our findings showed, only one study  
47  
48 212 reported on dental caries and periodontal status, nine on periodontal status, and two on tooth  
49  
50 213 loss. Based on the findings of this review, the evidence is lacking on the association of work  
51  
52 214 stress with dental caries and tooth loss. Eight of nine studies reported the significant  
53  
54 215 associations between multiple periodontal measures and work stress.

## 216 **Limitations of the review**

217 This systematic review has four limitations. First, the systematic literature search, screening,  
218 and quality assessments were conducted by only one investigator. A single screening could  
219 miss more studies than a double screening.<sup>37</sup> Second, only English language literature was  
220 included. Although a systematic review found no bias due to English-language restriction in  
221 systematic reviews,<sup>38</sup> this review might include bias. Third, there was no protocol for this  
222 systematic review. A priori systematic review protocol registration provides the rigor and  
223 trustworthiness of the reviews.<sup>39</sup> This might weaken the rigor and trustworthiness of our  
224 review. Finally, a meta-analysis could not be conducted owing to the heterogeneity of the  
225 included studies. Work stress was assessed using varied measures. Particularly, only a few  
226 studies used the current major measures of work stress. Indicators of periodontal status were  
227 also varied. No study used valid epidemiological definitions for periodontal disease as the  
228 outcome. The cut-off points differed between the two studies on tooth loss and work stress.  
229 Besides, there was only one study on dental caries and work stress. These limitations  
230 hindered us from performing a meta-analysis.

## 231 **Dental caries and work stress**

232 We found only one study on the cross-sectional association between work stress and dental  
233 caries.<sup>25</sup> The conclusion was that there was no significant association between work stress  
234 and dental caries. However, since the sample size was relatively small (n=164), there is the  
235 possibility of a false negative association. Besides, each subscale of the Karasek job strain  
236 model was simultaneously included in the statistical model. Generally, in the Karasek job  
237 strain model, the recommendation is to use four categories of job strain generated by the  
238 interaction of the subscales: High-strain jobs, active jobs, low-strain jobs, and passive jobs.<sup>9</sup>  
239 Due to the above treatments of the subscales, it is possible that the association was  
240 underestimated. Additionally, as there was no cohort study, we could not assess the

1  
2  
3  
4  
5  
6 241 prospective associations. Considering the above limitations, it was difficult to determine  
7  
8 242 whether work stress is associated with dental caries. A further study should include a cohort  
9  
10 243 design and a relatively large sample size with appropriate work stress measures.

#### 11 244 **Periodontal status and work stress**

12  
13  
14 245 Nine studies reported on the association between work stress and periodontal status.<sup>25-33</sup>  
15  
16 246 However, the outcome measures were varied across the included studies. Although there are  
17  
18 247 the accepted epidemiological definitions of periodontitis according to the European  
19  
20 248 Workshop in Periodontology and the Centers for Disease Control/American Academy of  
21  
22 249 Periodontology,<sup>40,41</sup> there was no study that used the definitions. It means that the included  
23  
24 250 studies reported the associations between work stress and periodontal measures, not  
25  
26 251 periodontal disease. In addition, the measurement of work stress was measured also varied  
27  
28 252 across studies. Each measure assessed different dimensions of work stress.<sup>42</sup> Due to the  
29  
30 253 heterogeneity of exposures and outcomes, we could not conduct a meta-analysis.

31  
32 254 Of the nine studies, only one study adjusted for the potential confounders, such as  
33  
34 255 socioeconomic status and work-related variables.<sup>25</sup> Besides, no cohort study was found. The  
35  
36 256 failure to adjust for the confounders and consider the induction time weakens the research  
37  
38 257 evidence. However, despite the above limitations, the consistent association between work  
39  
40 258 stress and worse periodontal status is noteworthy. To verify the current results, a further  
41  
42 259 cohort study using the validated definitions of periodontal disease and current measurements  
43  
44 260 of work stress, in addition to adjusting for the potential confounders should be performed.

#### 45 261 **Tooth loss and work stress**

46  
47  
48 262 Two studies on the association between work stress and tooth loss were identified. Hayashi's  
49  
50 263 study included only male workers employed at one manufacturing company.<sup>34</sup> In contrast,  
51  
52 264 Sato's study included active workers sampled from a general population.<sup>35</sup> However, the  
53  
54 265 response rate was relatively low (32%). The generalisability of both studies could be limited.

1  
2  
3  
4  
5  
6 266 The two studies had different cut-off points of tooth loss. Hayashi's study used the  
7  
8 267 cut-off point of more than 4 teeth lost. The cutoff point is higher than the mean number of  
9  
10 268 teeth loss (at 25 to 34, 35 to 45, 46 to 54, and 55 to 64 years = 0.16, 0.58, 1.48, and 4.00,  
11  
12 269 respectively) reported by the national statistical surveys.<sup>43</sup> This study targeted severe cases  
13  
14 270 only. In Sato's study, the outcome was the loss of at least more than one tooth. However, this  
15  
16 271 outcome relied on self-reported answers; therefore, self-reported bias might exist.

17  
18 272 Both studies showed an increased risk of tooth loss, although only one of the two  
19  
20 273 studies reported a significant association between work stress and tooth loss. However, due  
21  
22 274 to the above limitations, it is difficult to derive any form of conclusion. In the future, a cohort  
23  
24 275 study including general workers should be conducted to confirm these findings.

## 26 276 **Conclusions**

27  
28 277 Based on the findings, this systematic review suggests a lack of evidence on the association  
29  
30 278 of work stress with dental caries and tooth loss. Although eight of the nine studies reported  
31  
32 279 significant associations between multiple periodontal measures and work stress, no study  
33  
34 280 used valid epidemiological definitions of periodontal disease. For future research, well-  
35  
36 281 designed cohort studies including potential confounding factors and the use of generally  
37  
38 282 accepted measurements of work stress and periodontal disease are needed.

**Ethical Approval Statement**

Not applicable

**Contributors**

YuS contributed to the acquisition and the interpretation of data and drafting of the work. YaS and EY revised it critically for important intellectual content. All authors contributed to the conception and design of the work, approved the final version to be published, and agreed to be accountable for all aspects of the work in ensuring that questions related to the accuracy or integrity of any part of the work are appropriately investigated and resolved.

**Funding**

This study was supported by Grant-in-Aid for Early-Career Scientists from the Japan Society for the Promotion of Science KAKENHI (grant number JP19K19306).

**Competing interests**

The authors declare no potential conflicts of interest with respect to the research, authorship, and publication of this article.

**Patient consent for publication**

Not required.

**Provenance and peer review**

Not commissioned; externally peer-reviewed.

**Data availability statement**

Not applicable.

## References

1. Bernabe E, Marcenes W, Hernandez CR, et al. Global, Regional, and National Levels and Trends in Burden of Oral Conditions from 1990 to 2017: A Systematic Analysis for the Global Burden of Disease 2017 Study. *J Dent Res* 2020; 99: 362–373.
2. Pitts NB, Zero DT, Marsh PD, et al. Dental caries. *Nat Rev Dis Primer* 2017; 3: 17030.
3. Kinane DF, Stathopoulou PG, Papapanou PN. Periodontal diseases. *Nat Rev Dis Primer* 2017; 3: 17038.
4. Sheiham A, Croog SH. The psychosocial impact of dental diseases on individuals and communities. *J Behav Med* 1981; 4: 257–272.
5. Reisine ST. The Impact of Dental Conditions on Social Functioning and the Quality of Life. *Annu Rev Public Health* 1988; 9: 1–19.
6. Righolt AJ, Jevdjevic M, Marcenes W, et al. Global-, Regional-, and Country-Level Economic Impacts of Dental Diseases in 2015. *J Dent Res* 2018; 97: 501–507.
7. Lundberg U, Cooper C. The New Workplace in a Rapidly Changing World. In: *The science of occupational health: Stress, psychobiology, and the new world of work*. Chichester: Wiley-Blackwell, pp. 11–21.
8. Kivimäki M, Nyberg ST, Batty GD, et al. Job strain as a risk factor for coronary heart disease: a collaborative meta-analysis of individual participant data. *The Lancet* 2012; 380: 1491–1497.
9. Berkman L, Kawachi I, Theorell T. Working Conditions and Health. In: *Social epidemiology*. New York: Oxford University Press, 2014, pp. 153–181.
10. Lundberg U, Cooper C. Stress-Related Health Problems. In: *The science of occupational health: Stress, psychobiology, and the new world of work*. Chichester: Wiley-Blackwell, pp. 75–91.
11. Béjean S, Sultan-Taïeb H. Modeling the economic burden of diseases imputable to stress at work. *Eur J Health Econ* 2005; 6: 16–23.
12. Sabbah W, Gomaa N, Gireesh A. Stress, allostatic load, and periodontal diseases. *Periodontol 2000* 2018; 78: 154–161.
13. Gomaa N, Glogauer M, Tenenbaum H, et al. Social-Biological Interactions in Oral Disease: A ‘Cells to Society’ View. *PLOS ONE* 2016; 11: e0146218.
14. Tikhonova S, Booi L, D’Souza V, et al. Investigating the association between stress, saliva and dental caries: a scoping review. *BMC Oral Health* 2018; 18: 41.



15. Castro MML, Ferreira R de O, Fagundes NCF, et al. Association between Psychological Stress and Periodontitis: A Systematic Review. *Eur J Dent* 2020; 14: 171–179.
16. Lundberg U, Cooper C. Introduction: History of Work and Health. In: *The science of occupational health: Stress, psychobiology, and the new world of work*. Chichester: Wiley-Blackwell, pp. 1–10.
17. Moher D, Liberati A, Tetzlaff J, et al. Preferred reporting items for systematic reviews and meta-analyses: the PRISMA statement. *BMJ* 2009; 339: b2535.
18. Liberati A, Altman DG, Tetzlaff J, et al. The PRISMA statement for reporting systematic reviews and meta-analyses of studies that evaluate healthcare interventions: explanation and elaboration. *BMJ* 2009; 339: b2700.
19. Dekkers OM, Vandenbroucke JP, Cevallos M, et al. COSMOS-E: Guidance on conducting systematic reviews and meta-analyses of observational studies of etiology. *PLoS Med* 2019; 16: e1002742–e1002742.
20. Stroup DF, Berlin JA, Morton SC, et al. Meta-analysis of Observational Studies in Epidemiology: A Proposal for Reporting. *JAMA* 2000; 283: 2008–2012.
21. National Institutes of Health. Quality Assessment Tool for Observational Cohort and Cross-Sectional Studies, <https://www.nhlbi.nih.gov/health-topics/study-quality-assessment-tools> (2014, accessed 17 September 2020).
22. Atri M, Srivastava D, Kharbanda J, et al. Occupational Stress, Salivary Cortisol, and Periodontal Disease: A Clinical and Laboratory Study [retracted in: *J Int Oral Health*. 2016 May;8(5):650]. *J Int Oral Health JIOH* 2015; 7: 65–69.
23. Yoshiono K, Suzuki S, Ishizuka Y, et al. Relationship between job stress and subjective oral health symptoms in male financial workers in Japan. *Ind Health* 2017; 55: 119–126.
24. Capurro DA, Davidsen M. Socioeconomic inequalities in dental health among middle-aged adults and the role of behavioral and psychosocial factors: evidence from the Spanish National Health Survey. *Int J Equity Health* 2017; 16: 34.
25. Segura Marcenes W, Sheiham A. The relationship between work stress and oral health status. *Soc Sci Med* 1992; 35: 1511–1520.
26. Freeman R, Goss S. Stress measures as predictors of periodontal disease – a preliminary communication. *Community Dent Oral Epidemiol* 1993; 21: 176–177.
27. Linden GJ, Mullally BH, Freeman R. Stress and the progression of periodontal

disease. *J Clin Periodontol* 1996; 23: 675–680.

28. Genco RJ, Ho AW, Grossi SG, et al. Relationship of Stress, Distress, and Inadequate Coping Behaviors to Periodontal Disease. *J Periodontol* 1999; 70: 711–723.
29. Akhter R, Hannan MA, Okhubo R, et al. Relationship between stress factor and periodontal disease in a rural area population in Japan. *Eur J Med Res* 2005; 10: 352–357.
30. Talib Bandar K. The association between periodontal disease and job stress in Baghdad city. *J Kerbala Univ* 2009; 5: 47–57.
31. Mahendra L, Mahendra J, Austin RD, et al. Stress as an aggravating factor for periodontal diseases. *J Clin Diagn Res* 2011; 5: 889–93.
32. Ramji R. *Assessing the relationship between occupational stress and periodontitis in industrial workers*. PhD Thesis, Umeå International School of Public Health, 2011.
33. Islam MM, Ekuni D, Yoneda T, et al. Influence of Occupational Stress and Coping Style on Periodontitis among Japanese Workers: A Cross-Sectional Study. *Int J Environ Res Public Health* 2019; 16: 3540.
34. Hayashi N, Tamagawa H, Tanaka M, et al. Association of Tooth Loss with Psychosocial Factors in Male Japanese Employees. *J Occup Health* 2001; 43: 351–355.
35. Sato Y, Tsuboya T, Aida J, et al. Effort-reward imbalance at work and tooth loss: a cross-sectional study from the J-SHINE project. *Ind Health* 2020; 58: 26–34.
36. Karasek RA. Job Demands, Job Decision Latitude, and Mental Strain: Implications for Job Redesign. *Adm Sci Q* 1979; 24: 285–308.
37. Waffenschmidt S, Knellingen M, Sieben W, et al. Single screening versus conventional double screening for study selection in systematic reviews: a methodological systematic review. *BMC Med Res Methodol* 2019; 19: 132.
38. Morrison A, Polisena J, Husereau D, et al. The effect of English-language restriction on systematic review-based meta-analyses: a systematic review of empirical studies. *Int J Technol Assess Health Care* 2012; 28: 138–144.
39. Shamseer L, Moher D, Clarke M, et al. Preferred reporting items for systematic review and meta-analysis protocols (PRISMA-P) 2015: elaboration and explanation. *BMJ*; 349. Epub ahead of print 2015. DOI: 10.1136/bmj.g7647.
40. Page RC, Eke PI. Case Definitions for Use in Population-Based Surveillance of Periodontitis. *J Periodontol* 2007; 78: 1387–1399.
41. Tonetti MS, Claffey N, on behalf of the European Workshop in Periodontology group C. Advances in the progression of periodontitis and proposal of definitions of a

1  
2  
3  
4  
5  
6 periodontitis case and disease progression for use in risk factor research. *J Clin Periodontol*  
7 2005; 32: 210–213.

8 42. Leka S, Jain A, World Health Organization. Health impact of psychosocial hazards  
9 at work: an overview, <https://apps.who.int/iris/handle/10665/44428> (2010).

10 43. Ministry of Health, Labour and Welfare (Japan). *Dental Diseases Survey*,  
11 <https://www.mhlw.go.jp/toukei/list/62-17b.html> (2016, accessed 12 March 2021).  
12  
13  
14  
15  
16  
17  
18  
19  
20  
21  
22  
23  
24  
25  
26  
27  
28  
29  
30  
31  
32  
33  
34  
35  
36  
37  
38  
39  
40  
41  
42  
43  
44  
45  
46  
47  
48  
49  
50  
51  
52  
53  
54  
55  
56  
57  
58  
59  
60

## Tables

Table 1. Summary of included studies on work stress and oral conditions

| Author's name (year of publication)       | Study design    | Study location | Exposure (work stress)                                           | Outcome                                                                                                                                                                                                                                                                         | Number of participants                                                                                                               | Mean age of the participants and proportion of women | Covariates                                                                                                                                                       | Main results                                                                                                                                                                                                                                                                                                                                                                                                                                                |
|-------------------------------------------|-----------------|----------------|------------------------------------------------------------------|---------------------------------------------------------------------------------------------------------------------------------------------------------------------------------------------------------------------------------------------------------------------------------|--------------------------------------------------------------------------------------------------------------------------------------|------------------------------------------------------|------------------------------------------------------------------------------------------------------------------------------------------------------------------|-------------------------------------------------------------------------------------------------------------------------------------------------------------------------------------------------------------------------------------------------------------------------------------------------------------------------------------------------------------------------------------------------------------------------------------------------------------|
| <b>Dental caries</b>                      |                 |                |                                                                  |                                                                                                                                                                                                                                                                                 |                                                                                                                                      |                                                      |                                                                                                                                                                  |                                                                                                                                                                                                                                                                                                                                                                                                                                                             |
| Marcenes and Sheiham (1992) <sup>25</sup> | Cross-sectional | Brazil         | Karasek job strain model                                         | DMFS index (number of decayed (D), missing (M), and Filled (F) teeth surfaces per persons)                                                                                                                                                                                      | 164 male paid workers aged from 35 to 44 years                                                                                       | Mean age = 41.2 (standard deviation = 2.2)<br>0%     | Marital quality, toothbrushing frequency, sugar consumption, age, years of residence, type of toothpaste, frequency dental attendance, and socio-economic status | Work mental demand: Coefficients = 0.19 (95% CI = -0.91, 1.29)<br>Work control: Coefficients = 0.87 (95% CI = -0.18, 1.91)<br>Work variety: Coefficients = -0.06 (95% CI = -1.57, 1.45)<br>From a linear regression analysis                                                                                                                                                                                                                                |
| <b>Periodontal status</b>                 |                 |                |                                                                  |                                                                                                                                                                                                                                                                                 |                                                                                                                                      |                                                      |                                                                                                                                                                  |                                                                                                                                                                                                                                                                                                                                                                                                                                                             |
| Marcenes and Sheiham (1992) <sup>25</sup> | Cross-sectional | Brazil         | Karasek job strain model                                         | The presence or absence of teeth either with gums bleeding on probing or with pockets was used. The indicator was labelled as 'complete absence of teeth with gums bleeding on probing and with pockets', and 'presence of any tooth with gums bleeding on probing or pockets'. | 164 male paid workers aged from 35 to 44 years (16 workers were excluded from 164 participants due to missing values and edentulous) | Mean age = 41.2 (standard deviation = 2.2)<br>0%     | Marital quality, toothbrushing frequency, sugar consumption, age, years of residence, type of toothpaste, frequency dental attendance, and socio-economic status | Work mental demand: Odds ratio = 1.22 (95% confidence interval = 1.06, 1.37)<br>Work control: Odds ratio = 0.97 (95% confidence interval = 0.88, 1.07)<br>Work variety: Odds ratio = 0.99 (95% confidence interval = 0.85, 1.16)<br>From a logistic regression analysis<br>Type A behaviour: Coefficients = 0.41 (p-value=0.003)<br>Work environment (organisation/climate): Coefficients = -0.34 (p-value = 0.007)<br>(statistical model was not reported) |
| Freeman and Goss (1993) <sup>26</sup>     | Unknown         | Not reported   | Occupational Stress Indicator                                    | Mean increases in pocket depth                                                                                                                                                                                                                                                  | 10 women and 8 men from the head office of a large company                                                                           | Mean age = 39<br>55.6%                               | Unknown                                                                                                                                                          | Job satisfaction: Coefficients = -0.014 (p-value < 0.01)<br>Type A: Coefficients = 0.026 (p-value < 0.05)                                                                                                                                                                                                                                                                                                                                                   |
| Linden et al. (1996) <sup>27</sup>        | Unknown         | UK             | Occupational Stress Indicator assessed at the second examination | Changes in clinical attachment level after an interval of 5.5 (SD 0.6) years.                                                                                                                                                                                                   | 23 employed regular dental attendees aged between 20 and 50 years who had moderate or                                                | Mean age = 41.1 (standard deviation = 7.3)<br>43.5%  | Age and social class of the household                                                                                                                            |                                                                                                                                                                                                                                                                                                                                                                                                                                                             |

established periodontitis  
(13 men and 10 women)

Locus of control: Coefficients =  
-0.035 (p-value  $\geq$  0.05)  
(statistical model was not  
reported)

Job strain score among  
Attachment Loss categories  
(mean  $\pm$  standard error)  
Healthy: 2.12  $\pm$  0.05  
Low: 2.09  $\pm$  0.02  
Moderate: 2.16  $\pm$  0.02  
High: 2.09  $\pm$  0.05  
Severe: 2.22  $\pm$  0.05  
(nonsignificant)

From analysis of covariance

Job strain score among Alveolar  
Bone Loss categories (mean  $\pm$   
standard error)  
Healthy: 2.12  $\pm$  0.02  
Low: 2.10  $\pm$  0.03  
Moderate: 2.09  $\pm$  0.04  
Severe: 2.19  $\pm$  0.04  
(nonsignificant)  
From analysis of covariance

1,426 inhabitants aged  
25 to 74 years (741  
women and 685 men)  
\*working status was  
unknown

Mean age = 48.9  
(standard deviation  
= 13.9)  
52.0%

Age, gender, and levels of  
smoking.

Severity of Attachment Loss  
Healthy (0 to 1 mm clinical  
attachment level), low (1.1 to 2.0  
mm), moderate (2.1 to 3.0 mm),  
high (3.1 to 4.0 mm) and severe  
(4.1 to 8.0 mm)  
Severity of Alveolar Bone Loss  
Healthy (0.4 to 1.9 mm alveolar  
crestal height), low (2.0 to 2.9  
mm), moderate (3.0 to 3.9 mm),  
and severe ( $\geq$ 4.0 mm)

Problems of  
Everyday Living  
Scale of Pearlin and  
Schooler

1,089 employed and  
unemployed residents  
ranging in age from 18  
to 96 years of a farming  
village in the  
northernmost island of  
Japan (531 men and 558  
women)

Mean age = 55.0  
(standard deviation  
= 1.7)  
51.2%

Age, gender, employment  
status, smoking behaviour,  
stress within 1 month, self-  
health-related stress, family  
health-related stress,  
frequency of dental  
attendance, hyperlipidaemia,  
and diabetes mellitus

Mean clinical attachment loss  
<1.5 mm were assigned to a non-  
diseased group and those with  
mean clinical attachment loss  $\geq$ 1.5  
mm were assigned to a diseased  
group

Life events scale  
(yes or no)

Job stress (reference: No): Odds  
ratio = 1.71 (95% confidence  
interval = 1.10, 2.67) from a  
logistic regression analysis

The mean gingival index  
yes = 1.851 and no = 1.586 (p-  
value > 0.05)

64 working dental  
patients of both genders  
with ages ranging from  
23 to 65 years

Mean age and sex  
were not reported.

None

Gingival Index, probing pocket  
depth, bleeding on probing, and  
clinical attachment level

Life events scale  
(yes or no)

Total mean percentage of sites  
with probing pocket depth  $\geq$  4  
mm  
yes = 6.277% and no = 4.762%  
(p-values <0.05)

1  
2  
3  
4  
5  
6  
7  
8  
9  
10  
11  
12  
13  
14  
15  
16  
17  
18  
19  
20  
21  
22  
23  
24  
25  
26  
27  
28  
29  
30  
31  
32  
33  
34  
35  
36  
37  
38  
39  
40  
41  
42  
43  
44  
45  
46  
47

Total mean Bleeding On Probing  
yes = 41.534% and no = 32.137% (p-value > 0.05)

The mean of the clinical attachment level  
yes = 2.837 and no = 2.275 (p-value > 0.05)  
(all p-values from t-test)

Mean Occupational Stress Index Score (standard deviation)  
Control: 79.53 (23.57)  
Test group 1: 133.68 (33.23)  
Test group 2: 158.13 (32.44)  
p-value <0.001  
(p-values from ANOVA with the Scheffe Test)

|                                      |                 |       |                                                                                                                                       |                                                                                                                                                                                                                                                                                                                           |                                                                                                                                             |                                                                                                                                                                                                                                                                                                              |                                                                                                                                                                         |
|--------------------------------------|-----------------|-------|---------------------------------------------------------------------------------------------------------------------------------------|---------------------------------------------------------------------------------------------------------------------------------------------------------------------------------------------------------------------------------------------------------------------------------------------------------------------------|---------------------------------------------------------------------------------------------------------------------------------------------|--------------------------------------------------------------------------------------------------------------------------------------------------------------------------------------------------------------------------------------------------------------------------------------------------------------|-------------------------------------------------------------------------------------------------------------------------------------------------------------------------|
| Mahendra et al. (2011) <sup>31</sup> | Cross-sectional | India | An occupational stress index of Srivastava, A. K. and Singh, A. P.                                                                    | Control group (n=30): probing pocket depth (PPD) ≤ 3 mm<br>Test group 1 (n=40): at least four sites with probing pocket depth > 4mm and ≤ 6 mm<br>Test group 2 (n=30): at least four sites with probing pocket depth > 6mm                                                                                                | 110 police personnel aged 35-48 years with moderate or established periodontitis                                                            | Mean age (standard deviation); control group: 40.23 (3.46); test group 1: 40.42 (3.54); test group 2: 41.18 (3.78)<br>Sex was not reported.<br>Age groups (SS [n=130], LS [n=68])<br>15-19 years: 0%, 1%<br>20-29 years: 38%, 60%<br>30-44 years: 45%, 20%<br>45-64 years: 17%, 19%<br>Sex was not reported. | None                                                                                                                                                                    |
| Ramji, (2011) <sup>32</sup>          | Cross-sectional | India | Self-reported job stress (having or not)                                                                                              | Community Periodontal Index and Treatment Needs protocol (a tooth scored 3 or 4 indicating increased pocket depth of over 2 mm indicates presence of periodontitis)                                                                                                                                                       | 198 industrial labour full time workers from a small scale sector (SS) and 68 from a large scale sector (LS) between the age of 18-64 years | 15-19 years: 0%, 1%<br>20-29 years: 38%, 60%<br>30-44 years: 45%, 20%<br>45-64 years: 17%, 19%<br>Sex was not reported.                                                                                                                                                                                      | None                                                                                                                                                                    |
| Islam et al. (2019) <sup>33</sup>    | Cross-sectional | Japan | Brief Job Stress Questionnaire developed by referring the demand-control-support model in Japan (low stress, High stress-High coping, | No inflammation of the gingiva or redness and/or swelling of the interdental papilla without gingival recession was classified as non-periodontitis, and any redness and/or swelling in the gingiva with gingival recession and/or tooth mobility was classified as periodontitis, based on visual inspection by dentists | 738 workers of a Japanese crane manufacturing company (92 were women)                                                                       | Mean age = 40.7 (standard deviation = 10.5)<br>12.5%                                                                                                                                                                                                                                                         | Age, gender, daily flossing, regular dental checkup, body mass index, sleeping duration, current smoker, daily alcohol drinking, monthly overtime work, and worker type |

1 and High stress-low  
2 coping)  
3 \*coping was  
4 assessed using a  
5 questionnaire  
6 developed by a  
7 Japanese company

8 **Tooth loss**

|    |                      |                 |       |                                                                                 |                                                                                   |                                                                                   |                                                         |                                                                                                                                                                                               |                                                                                                                                                                |
|----|----------------------|-----------------|-------|---------------------------------------------------------------------------------|-----------------------------------------------------------------------------------|-----------------------------------------------------------------------------------|---------------------------------------------------------|-----------------------------------------------------------------------------------------------------------------------------------------------------------------------------------------------|----------------------------------------------------------------------------------------------------------------------------------------------------------------|
| 9  |                      |                 |       |                                                                                 |                                                                                   |                                                                                   |                                                         |                                                                                                                                                                                               |                                                                                                                                                                |
| 10 | Hayashi et al.       | Cross-sectional | Japan | Karasek job strain model (high job demand and low control and other categories) | Tooth loss via oral examination ( $\geq 4$ teeth lost and $3 \leq$ teeth lost)    | 252 male workers employed at a manufacturing company aged 20–59 years             | Mean age = 38.7 (standard deviation = 11.0) 0%          | Age, type A behaviour, alexythymia, depression, job satisfaction, and life satisfaction                                                                                                       | High job demand and low control (reference: other categories): Odds ratio = 1.2 (95% confidence interval = 0.40, 3.42) from a logistic regression analysis     |
| 11 | (2001) <sup>34</sup> |                 |       |                                                                                 |                                                                                   |                                                                                   |                                                         |                                                                                                                                                                                               |                                                                                                                                                                |
| 12 |                      |                 |       |                                                                                 |                                                                                   |                                                                                   |                                                         |                                                                                                                                                                                               |                                                                                                                                                                |
| 13 |                      |                 |       |                                                                                 |                                                                                   |                                                                                   |                                                         |                                                                                                                                                                                               |                                                                                                                                                                |
| 14 |                      |                 |       |                                                                                 |                                                                                   |                                                                                   |                                                         |                                                                                                                                                                                               |                                                                                                                                                                |
| 15 |                      |                 |       |                                                                                 |                                                                                   |                                                                                   |                                                         |                                                                                                                                                                                               |                                                                                                                                                                |
| 16 | Sato et al.          | Cross-sectional | Japan | Effort-Reward Imbalance model (having or not)                                   | Self-reported tooth loss Having tooth loss or not (= no experience of tooth loss) | 1,195 employees aged 25–50 years old who work 20 h per week or more (women = 569) | Median age = 37 (1st and 3rd quartiles = 31 and 43) 48% | Age, sex, marital status, annual household income, years of education, employment status, occupation, working hours per week, job position, company size, body mass index, and smoking status | High effort-reward imbalance ratio: Prevalence ratio = 1.20 (95% confidence interval = 1.01, 1.42) from Poisson regression models with a robust error variance |
| 17 | (2020) <sup>35</sup> |                 |       |                                                                                 |                                                                                   |                                                                                   |                                                         |                                                                                                                                                                                               |                                                                                                                                                                |
| 18 |                      |                 |       |                                                                                 |                                                                                   |                                                                                   |                                                         |                                                                                                                                                                                               |                                                                                                                                                                |
| 19 |                      |                 |       |                                                                                 |                                                                                   |                                                                                   |                                                         |                                                                                                                                                                                               |                                                                                                                                                                |
| 20 |                      |                 |       |                                                                                 |                                                                                   |                                                                                   |                                                         |                                                                                                                                                                                               |                                                                                                                                                                |
| 21 |                      |                 |       |                                                                                 |                                                                                   |                                                                                   |                                                         |                                                                                                                                                                                               |                                                                                                                                                                |
| 22 |                      |                 |       |                                                                                 |                                                                                   |                                                                                   |                                                         |                                                                                                                                                                                               |                                                                                                                                                                |

Table 2. Quality assessment of included studies

|                                           | Q1  | Q2  | Q3  | Q4  | Q5  | Q6 | Q7 | Q8  | Q9  | Q10 | Q11 | Q12 | Q13 | Q14 | Quality Rating (Good, Fair, or Poor) |
|-------------------------------------------|-----|-----|-----|-----|-----|----|----|-----|-----|-----|-----|-----|-----|-----|--------------------------------------|
| Marcenes and Sheiham (1992) <sup>25</sup> | Yes | Yes | NR  | Yes | Yes | No | No | Yes | Yes | No  | Yes | Yes | NA  | Yes | Fair                                 |
| Freeman and Goss (1993) <sup>26</sup>     | Yes | Yes | NR  | No  | Yes | No | No | Yes | Yes | No  | Yes | Yes | NA  | No  | Poor                                 |
| Linden et al. (1996) <sup>27</sup>        | Yes | Yes | NR  | Yes | Yes | No | No | Yes | Yes | No  | Yes | Yes | NA  | No  | Poor                                 |
| Genco et al. (1999) <sup>28</sup>         | Yes | Yes | NR  | No  | Yes | No | No | Yes | No  | No  | Yes | Yes | NA  | No  | Poor                                 |
| Akhter et al. (2005) <sup>29</sup>        | Yes | Yes | NR  | No  | Yes | No | No | NA  | No  | No  | Yes | Yes | NA  | No  | Poor                                 |
| Talib Bandar (2009) <sup>30</sup>         | Yes | Yes | NR  | No  | No  | No | No | NA  | No  | No  | Yes | Yes | NA  | No  | Poor                                 |
| Mahendra et al. (2011) <sup>31</sup>      | Yes | Yes | NR  | Yes | Yes | No | No | NA  | Yes | No  | Yes | Yes | NA  | No  | Poor                                 |
| Ramji (2011) <sup>32</sup>                | Yes | Yes | No  | Yes | Yes | No | No | NA  | No  | No  | Yes | Yes | NA  | No  | Poor                                 |
| Islam et al. (2019) <sup>33</sup>         | Yes | Yes | NR  | Yes | Yes | No | No | NA  | No  | No  | Yes | Yes | NA  | No  | Poor                                 |
| Hayashi et al. (2001) <sup>34</sup>       | Yes | Yes | Yes | Yes | Yes | No | No | NA  | Yes | No  | Yes | Yes | NA  | No  | Fair                                 |
| Sato et al. (2020) <sup>35</sup>          | Yes | Yes | No  | Yes | Yes | No | No | NA  | Yes | No  | Yes | No  | NA  | Yes | Fair                                 |

Abbreviation: CD, cannot determine; NA, not applicable; NR, not reported

Q1. Was the research question or objective in this paper clearly stated?

Q2. Was the study population clearly specified and defined?

Q3. Was the participation rate of eligible persons at least 50%?

Q4. Were all the subjects selected or recruited from the same or similar populations (including the same time period)? Were inclusion and exclusion criteria for being in the study prespecified and applied uniformly to all participants?

Q5. Was a sample size justification, power description, or variance and effect estimates provided?

Q6. For the analyses in this paper, were the exposure(s) of interest measured prior to the outcome(s) being measured?

Q7. Was the timeframe sufficient so that one could reasonably expect to see an association between exposure and outcome if it existed?

Q8. For exposures that can vary in amount or level, did the study examine different levels of the exposure as related to the outcome (e.g., categories of



1 exposure, or exposure measured as continuous variable)?

2  
3 Q9. Were the exposure measures (independent variables) clearly defined, valid, reliable, and implemented consistently across all study participants?

4  
5 Q10. Was the exposure(s) assessed more than once over time?

6  
7 Q11. Were the outcome measures (dependent variables) clearly defined, valid, reliable, and implemented consistently across all study participants?

8  
9 Q12. Were the outcome assessors blinded to the exposure status of participants?

10  
11 Q13. Was loss to follow-up after baseline 20% or less?

12  
13 Q14. Were key potential confounding variables measured and adjusted statistically for their impact on the relationship between exposure(s) and  
14 outcome(s)?  
15  
16  
17  
18  
19  
20  
21  
22  
23  
24  
25  
26  
27  
28  
29  
30  
31  
32  
33  
34  
35  
36  
37  
38  
39  
40  
41  
42  
43  
44  
45  
46  
47

1 Figure 1. Flow of search strategy and selection of studies for a systematic review.  
2  
3  
4  
5  
6  
7  
8  
9  
10  
11  
12  
13  
14  
15  
16  
17  
18  
19  
20  
21  
22  
23  
24  
25  
26  
27  
28  
29  
30  
31  
32  
33  
34  
35  
36  
37  
38  
39  
40  
41  
42  
43  
44  
45  
46  
47

For peer review only

1 The search of two databases (PubMed  
2 and Scopus) on August 12, 2020  
3 identified 402 records

4  
5 129 duplicated records were removed

6  
7 The titles and abstracts of 273 records  
8 were screened  
9

10  
11  
12  
13 Among them, 11 articles met the  
14 inclusion criteria  
15  
16

17  
18 Three additional records were identified  
19 through other sources (reference lists and hand  
20 search)  
21

22  
23 Full text assessment of 14 articles were  
24 performed  
25

26  
27 Excluded articles after full-text assessment  
28 (n=3; Retracted [n=1] and used composite  
29 outcome [n=2])  
30

31 Finally, 11 articles were included  
32 (n=1, caries and periodontal status; n=8,  
33 periodontal status, n=2: tooth loss)  
34

1  
2  
3  
4  
5  
6  
7  
8  
9  
10  
11  
12  
13  
14  
15  
16  
17  
18  
19  
20  
21  
22  
23  
24  
25  
26  
27  
28  
29  
30  
31  
32  
33  
34  
35  
36  
37  
38  
39  
40  
41  
42  
43  
44  
45  
46

Supplemental Table 1. The precise search strategies for each database.

| Database | Date            | Combination of terms used                                                     | Limitation | Result |
|----------|-----------------|-------------------------------------------------------------------------------|------------|--------|
| PubMed   | August 12, 2020 | ("job strain" OR "effort reward") AND (dental OR oral)                        | English    | 22     |
| PubMed   | August 12, 2020 | ("job stress" OR "work stress" OR "occupational stress") AND (dental OR oral) | English    | 143    |
| Scopus   | August 12, 2020 | ("job strain" OR "effort reward") AND (dental OR oral)                        | English    | 20     |
| Scopus   | August 12, 2020 | ("job stress" OR "work stress" OR "occupational stress") AND (dental OR oral) | English    | 217    |

For peer review only

## MOOSE Checklist for Meta-analyses of Observational Studies

| Item No                                     | Recommendation                                                                                                                                                                                                                                                               | Reported on Page No             |
|---------------------------------------------|------------------------------------------------------------------------------------------------------------------------------------------------------------------------------------------------------------------------------------------------------------------------------|---------------------------------|
| Reporting of background should include      |                                                                                                                                                                                                                                                                              |                                 |
| 1                                           | Problem definition                                                                                                                                                                                                                                                           | 5-6                             |
| 2                                           | Hypothesis statement                                                                                                                                                                                                                                                         | 6                               |
| 3                                           | Description of study outcome(s)                                                                                                                                                                                                                                              | 6                               |
| 4                                           | Type of exposure or intervention used                                                                                                                                                                                                                                        | 6                               |
| 5                                           | Type of study designs used                                                                                                                                                                                                                                                   | 6                               |
| 6                                           | Study population                                                                                                                                                                                                                                                             | 6                               |
| Reporting of search strategy should include |                                                                                                                                                                                                                                                                              |                                 |
| 7                                           | Qualifications of searchers (eg, librarians and investigators)                                                                                                                                                                                                               | 7                               |
| 8                                           | Search strategy, including time period included in the synthesis and key words                                                                                                                                                                                               | 6-7,<br>Supplemental<br>Table 1 |
| 9                                           | Effort to include all available studies, including contact with authors                                                                                                                                                                                                      | 7                               |
| 10                                          | Databases and registries searched                                                                                                                                                                                                                                            | 6,<br>Supplemental<br>Table 1   |
| 11                                          | Search software used, name and version, including special features used (eg, explosion)                                                                                                                                                                                      | NA                              |
| 12                                          | Use of hand searching (eg, reference lists of obtained articles)                                                                                                                                                                                                             | 7,<br>Supplemental<br>Table 1   |
| 13                                          | List of citations located and those excluded, including justification                                                                                                                                                                                                        | 6                               |
| 14                                          | Method of addressing articles published in languages other than English                                                                                                                                                                                                      | NA                              |
| 15                                          | Method of handling abstracts and unpublished studies                                                                                                                                                                                                                         | 7                               |
| 16                                          | Description of any contact with authors                                                                                                                                                                                                                                      | NA                              |
| Reporting of methods should include         |                                                                                                                                                                                                                                                                              |                                 |
| 17                                          | Description of relevance or appropriateness of studies assembled for assessing the hypothesis to be tested                                                                                                                                                                   | 6                               |
| 18                                          | Rationale for the selection and coding of data (eg, sound clinical principles or convenience)                                                                                                                                                                                | 7                               |
| 19                                          | Documentation of how data were classified and coded (eg, multiple raters, blinding and interrater reliability)                                                                                                                                                               | 7                               |
| 20                                          | Assessment of confounding (eg, comparability of cases and controls in studies where appropriate)                                                                                                                                                                             | 7                               |
| 21                                          | Assessment of study quality, including blinding of quality assessors, stratification or regression on possible predictors of study results                                                                                                                                   | 7                               |
| 22                                          | Assessment of heterogeneity                                                                                                                                                                                                                                                  | NA                              |
| 23                                          | Description of statistical methods (eg, complete description of fixed or random effects models, justification of whether the chosen models account for predictors of study results, dose-response models, or cumulative meta-analysis) in sufficient detail to be replicated | 7                               |
| 24                                          | Provision of appropriate tables and graphics                                                                                                                                                                                                                                 | Table 1,<br>Table 2             |
| Reporting of results should include         |                                                                                                                                                                                                                                                                              |                                 |
| 25                                          | Graphic summarizing individual study estimates and overall estimate                                                                                                                                                                                                          | NA                              |
| 26                                          | Table giving descriptive information for each study included                                                                                                                                                                                                                 | Table 1                         |
| 27                                          | Results of sensitivity testing (eg, subgroup analysis)                                                                                                                                                                                                                       | NA                              |
| 28                                          | Indication of statistical uncertainty of findings                                                                                                                                                                                                                            | NA                              |

| Item No                                 | Recommendation                                                                                                            | Reported on Page No |
|-----------------------------------------|---------------------------------------------------------------------------------------------------------------------------|---------------------|
| Reporting of discussion should include  |                                                                                                                           |                     |
| 29                                      | Quantitative assessment of bias (eg, publication bias)                                                                    | 11-12               |
| 30                                      | Justification for exclusion (eg, exclusion of non-English language citations)                                             | 11-12               |
| 31                                      | Assessment of quality of included studies                                                                                 | 12-14               |
| Reporting of conclusions should include |                                                                                                                           |                     |
| 32                                      | Consideration of alternative explanations for observed results                                                            | 12-14               |
| 33                                      | Generalization of the conclusions (ie, appropriate for the data presented and within the domain of the literature review) | 12-14               |
| 34                                      | Guidelines for future research                                                                                            | 12-14               |
| 35                                      | Disclosure of funding source                                                                                              | 15                  |

From: Stroup DF, Berlin JA, Morton SC, et al. Meta-analysis of Observational Studies in Epidemiology: A Proposal for Reporting. JAMA. 2000;283(15):2008–2012. doi:10.1001/jama.283.15.2008

Abbreviation: NA, not applicable

# BMJ Open

## Work stress and oral conditions: A systematic review of observational studies

|                                 |                                                                                                                                                                                                                                                                                                                                                                                |
|---------------------------------|--------------------------------------------------------------------------------------------------------------------------------------------------------------------------------------------------------------------------------------------------------------------------------------------------------------------------------------------------------------------------------|
| Journal:                        | <i>BMJ Open</i>                                                                                                                                                                                                                                                                                                                                                                |
| Manuscript ID                   | bmjopen-2020-046532.R2                                                                                                                                                                                                                                                                                                                                                         |
| Article Type:                   | Original research                                                                                                                                                                                                                                                                                                                                                              |
| Date Submitted by the Author:   | 12-Apr-2021                                                                                                                                                                                                                                                                                                                                                                    |
| Complete List of Authors:       | Sato, Yukihiro; Asahikawa Medical University, Division of Public Health and Epidemiology, Department of Social Medicine<br>Saijo, Yasuaki; Asahikawa Medical University, Division of Public Health and Epidemiology, Department of Social Medicine<br>Yoshioka, Eiji ; Asahikawa Medical University, Division of Public Health and Epidemiology, Department of Social Medicine |
| <b>Primary Subject Heading</b>: | Occupational and environmental medicine                                                                                                                                                                                                                                                                                                                                        |
| Secondary Subject Heading:      | Dentistry and oral medicine                                                                                                                                                                                                                                                                                                                                                    |
| Keywords:                       | OCCUPATIONAL & INDUSTRIAL MEDICINE, SOCIAL MEDICINE, EPIDEMIOLOGY                                                                                                                                                                                                                                                                                                              |
|                                 |                                                                                                                                                                                                                                                                                                                                                                                |

SCHOLARONE™  
Manuscripts



I, the Submitting Author has the right to grant and does grant on behalf of all authors of the Work (as defined in the below author licence), an exclusive licence and/or a non-exclusive licence for contributions from authors who are: i) UK Crown employees; ii) where BMJ has agreed a CC-BY licence shall apply, and/or iii) in accordance with the terms applicable for US Federal Government officers or employees acting as part of their official duties; on a worldwide, perpetual, irrevocable, royalty-free basis to BMJ Publishing Group Ltd ("BMJ") its licensees and where the relevant Journal is co-owned by BMJ to the co-owners of the Journal, to publish the Work in this journal and any other BMJ products and to exploit all rights, as set out in our [licence](#).

The Submitting Author accepts and understands that any supply made under these terms is made by BMJ to the Submitting Author unless you are acting as an employee on behalf of your employer or a postgraduate student of an affiliated institution which is paying any applicable article publishing charge ("APC") for Open Access articles. Where the Submitting Author wishes to make the Work available on an Open Access basis (and intends to pay the relevant APC), the terms of reuse of such Open Access shall be governed by a Creative Commons licence – details of these licences and which [Creative Commons](#) licence will apply to this Work are set out in our licence referred to above.

Other than as permitted in any relevant BMJ Author's Self Archiving Policies, I confirm this Work has not been accepted for publication elsewhere, is not being considered for publication elsewhere and does not duplicate material already published. I confirm all authors consent to publication of this Work and authorise the granting of this licence.



**Title**

Work stress and oral conditions: A systematic review of observational studies

**Authors**

Yukihiro Sato, DDS, PhD, 1 E-mail: ys@epid.work

Yasuaki Saijo, MD, PhD, 1, E-mail: y-saijo@asahikawa-med.ac.jp

Eiji Yoshioka, MD, PhD, 1, E-mail: e-yoshi@asahikawa-med.ac.jp

1. Division of Public Health and Epidemiology, Department of Social Medicine, Asahikawa Medical University, Japan

**Corresponding Author**

Yukihiro Sato, D.D.S., Ph.D

E-mail: ys@epid.work

Assistant Professor

Division of Public Health and Epidemiology, Department of Social Medicine, Asahikawa Medical University

078-8510, 1-1-1, Midorigaoka higashi2-jo, Asahikawa-shi, Hokkaido, Japan

TEL: +81 166-68-2404

FAX: +81 166-68-2409

1  
2  
3  
4  
5  
6  
7  
8  
9  
10  
11  
12  
13  
14  
15  
16  
17  
18  
19  
20  
21  
22  
23  
24  
25  
26  
27  
28  
29  
30  
31  
32  
33  
34  
35  
36  
37  
38  
39  
40  
41  
42  
43  
44  
45  
46  
47  
48  
49  
50  
51  
52  
53  
54  
55  
56  
57  
58  
59  
60

## 1 **Abstract (300/300)**

2 **Objectives:** Although psychological stress is a risk factor for oral diseases, there seems to be  
3 no review on work stress. This study aimed to review the evidence on the association between  
4 work stress and oral conditions, including dental caries, periodontal status, and tooth loss.

5 **Design:** A systematic review of published observational studies.

6 **Data sources:** A systematic literature search was conducted in PubMed and Scopus  
7 databases on August 12, 2020.

8 **Study selection:** Articles were screened based on the following inclusion criteria: published  
9 after 1966; in English only; epidemiological studies on humans (except case studies, reviews,  
10 letters, commentaries, and editorials); and examined the association of work stress with  
11 dental caries, periodontal status, and tooth loss.

12 **Data extraction:** Data was extracted from eligible studies. A quality assessment was  
13 conducted using the Quality Assessment Tool for Observational Cohort and Cross-Sectional  
14 Studies.

15 **Results:** Of 402 articles identified, 11 met the inclusion criteria, and one study assessed the  
16 association of work stress with dental caries and periodontal status. Of 11 studies, one  
17 reported a nonsignificant association between work stress and dental caries; eight of nine  
18 studies reported a significant association between work stress and worse periodontal status;  
19 and one of two studies reported a significant association between work stress and tooth loss.  
20 Nine of eleven studies were cross-sectional, while the remaining two studies had unclear  
21 methodology. Only two studies were sufficiently adjusted for potential confounders. Eight  
22 studies assessed work stress but did not use the current major measures. Three studies were  
23 rated as fair, while eight studies had poor quality.

24 **Conclusions:** There is a lack of evidence on the association of work stress with dental caries  
25 and tooth loss. Eight studies suggested potential associations between periodontal status and

1  
2  
3  
4  
5  
6 26 work stress. Cohort studies using the major work stress measures and adjusting for the  
7  
8 27 potential confounders are needed.  
9

10 28

11  
12 29 **Keywords**

13  
14 30 systematic review, work stress, job stress, occupational stress, oral health, oral diseases  
15  
16  
17  
18  
19  
20  
21  
22  
23  
24  
25  
26  
27  
28  
29  
30  
31  
32  
33  
34  
35  
36  
37  
38  
39  
40  
41  
42  
43  
44  
45  
46  
47  
48  
49  
50  
51  
52  
53  
54  
55  
56  
57  
58  
59  
60

For peer review only

1  
2  
3  
4  
5  
6 31 **Strengths and limitations of this study**  
7

8 32 ► This is the first systematic review to evaluate and summarise the literature on the  
9  
10 33 association between work stress and oral conditions, including dental caries, periodontal  
11  
12 34 status, and tooth loss.

13  
14 35 ► This systematic review provides a comprehensive insight into the quality of the included  
15  
16 36 papers.

17  
18 37 ► The systematic literature search, screening, and quality assessments were conducted by  
19  
20 38 only one investigator.

21  
22 39 ► A meta-analysis could not be conducted because of the heterogeneity of work stress  
23  
24 40 measures and outcome definitions.  
25  
26  
27  
28  
29  
30  
31  
32  
33  
34  
35  
36  
37  
38  
39  
40  
41  
42  
43  
44  
45  
46  
47  
48  
49  
50  
51  
52  
53  
54  
55  
56  
57  
58  
59  
60

## 41 INTRODUCTION

42 Oral diseases, such as dental caries and periodontal disease, are a major health concern  
43 worldwide. The Global Burden of Disease study has estimated that 2.3 billion individuals  
44 had untreated dental caries, 796 million had severe periodontal disease, and 267 million had  
45 a complete loss of natural teeth in 2017.<sup>1</sup> Dental caries is the destruction of dental hard tissues  
46 in the crowns and roots of the teeth.<sup>2</sup> Periodontal diseases are chronic inflammatory  
47 conditions with disorders of the tissues surrounding and supporting the teeth.<sup>3</sup> Tooth loss is  
48 mainly the consequence of dental caries and periodontal disease.<sup>2,3</sup> Because oral diseases  
49 result in severe toothache and eating, sleeping, and communication disabilities,<sup>4,5</sup> poor oral  
50 conditions can restrict work performance<sup>4,5</sup> and create a significant economic burden.<sup>6</sup> Indeed,  
51 work productivity loss due to oral conditions is estimated at 187.61 billion US dollars  
52 annually.<sup>6</sup> The necessity of preventing oral diseases for working adults is highlighted.

53 Since the 1990s, rapid changes in the global economy and the diverse markets have  
54 occurred, and psychological workplace stress has become more prevalent and severe,  
55 especially among industrialised countries.<sup>7</sup> Indeed, Kivimäki et al. reported a 15% prevalence  
56 of job strain measured using job-content and demand-control questionnaires from 13  
57 European cohorts' data (1985–2006).<sup>8</sup> Besides, work stress can have profound effects on  
58 health. There is accumulating evidence of the risk of work stress on cancer, cardiovascular  
59 diseases, diabetes, and depression.<sup>9,10</sup> Béjean and Sultan-Taïeb estimated that the work-  
60 related stress costs due to illnesses could range between €1,167 million and €1,975 million  
61 in France in 2000.<sup>11</sup> Work stress affects workers' health and productivity.

62 Psychological stress is recognised as a risk factor for dental caries and periodontal  
63 diseases. Psychological stress is related to oral diseases through immune system dysfunction,  
64 increased stress hormones, cariogenic bacterial counts, and poor oral health behaviours.<sup>12,13</sup>  
65 Work stress is strongly linked with psychological and physical health.<sup>9,10</sup> Previous systematic

1  
2  
3  
4  
5  
6 66 reviews suggested potential associations of psychological stress with dental caries and  
7  
8 67 periodontitis.<sup>14,15</sup> However, there seems to be no review on the association between work  
9  
10 68 stress and oral diseases. Today, work stress has become an increasingly serious problem.  
11  
12 69 Besides, the number of women in the workforce and dual-earner families have been  
13  
14 70 increasing.<sup>16</sup> A wide range of populations can suffer the risk of oral diseases from exposure  
15  
16 71 to work stress. Thus, the aim of this systematic review was to evaluate and summarise the  
17  
18 72 literature on the association between work stress and oral conditions, including dental caries,  
19  
20 73 periodontal status, and tooth loss. We set the following review question: Is work stress  
21  
22 74 associated with dental caries, periodontal status, and tooth loss among working adults?  
23  
24  
25

## 26 76 **METHODS**

27  
28 77 The reporting of this systematic review conforms to the Preferred Reporting Items for  
29  
30 78 Systematic Reviews and Meta-Analyses (PRISMA) guidelines.<sup>17,18</sup> We also followed the  
31  
32 79 Conducting Systematic Reviews and Meta-Analyses of Observational Studies of Etiology  
33  
34 80 (COSMOS-E) guidance<sup>19</sup> and the reporting of Meta-analysis Of Observational Studies in  
35  
36 81 Epidemiology (MOOSE).<sup>20</sup> The protocol of this systematic review was not registered.

### 38 82 **Eligibility criteria**

39  
40 83 Published studies were eligible if they: 1) were published in English; 2) were epidemiological  
41  
42 84 studies on humans (except case studies, reviews, letters, commentaries, and editorials); and  
43  
44 85 3) examined the association of work stress with dental caries, periodontal status, and tooth  
45  
46 86 loss.

### 48 87 **Information sources and searches**

49  
50 88 On August 12, 2020, we identified potentially relevant published studies in PubMed (1966  
51  
52 89 to August 12, 2020) and Scopus (1966 to August 12, 2020) databases. As PubMed and  
53  
54 90 Scopus have only data back to 1966, we focused on articles published after 1966. We used  
55  
56  
57

1  
2  
3  
4  
5  
6 91 the following script to obtain a wide range of literature: ("job strain" OR "effort reward")  
7  
8 92 AND (dental OR oral); ("job stress" OR "work stress" OR "occupational stress") AND  
9  
10 93 (dental OR oral). The details of the search strategies for each database are shown in  
11  
12 94 Supplemental Table 1. Besides, we manually hand-searched for potentially suitable studies  
13  
14 95 through the reference lists of identified articles and Google scholar. After excluding duplicate  
15  
16 96 articles, one author (YuS) assessed the titles and abstracts according to the aforementioned  
17  
18 97 criteria. Then, eligible studies were selected for the full-text review.

#### 98 **Data extraction**

99 One author (YuS) extracted the following information from each eligible study: 1) name of  
100 the first author; 2) study design; 3) study location (country); 4) number of participants and  
101 work-related characteristics; 5) exposure and its measurements; 6) outcome and its  
102 measurements; 7) age range and proportion of women; 8) covariates included in the adjusted  
103 models; and 9) the main results. The results were shown in Table 1.

#### 104 **Quality assessment**

105 We used the Quality Assessment Tool for Observational Cohort and Cross-Sectional Studies  
106 to assess the quality of included studies.<sup>21</sup> This tool includes 14 questions for evaluating the  
107 internal validity of a study and these questions are documented in the footnote of Table 2.  
108 For each question, one author (YuS) rated them as yes, no, or other (including cannot  
109 determine, not reported, and not applicable). The overall quality rating for the study was  
110 regarded as good if all the domains were assessed favourably.

#### 111 **Synthesis of results**

112 A meta-analysis could not be conducted because of the heterogeneity of work stress measures  
113 and outcome definitions.

#### 114 **Patient and public involvement**

115 No patient involved.

116

## 117 **RESULTS**

118 Figure 1 presents the flow diagram of information through the phases of the systematic  
119 review. Of the 402 articles identified in PubMed and Scopus databases, 129 duplicated  
120 articles were removed, the titles and abstracts of 273 were screened, and 11 met the eligibility  
121 criteria. Three more articles identified through reference lists and hand-search were added.  
122 One article was identified by a hand-search using Google Scholar,<sup>22</sup> one was a plagiarised  
123 article,<sup>23</sup> and the third was from a reference list.<sup>24</sup> After full-text assessments of 14 articles,  
124 three were excluded due to retraction (n=1)<sup>25</sup> and the use of composite outcomes including  
125 dental caries and periodontal status (n=2).<sup>26,27</sup> Finally, 11 articles were included in this  
126 systematic review.<sup>22–24,28–35</sup>

### 127 **Study characteristics of individual studies**

128 Table 1 shows the 12 summaries from the 11 studies. One of eleven studies reported on dental  
129 caries and periodontal status,<sup>28</sup> eight reported on periodontal status,<sup>22–24,29–33</sup> and two reported  
130 on tooth loss.<sup>34,35</sup> Three studies were conducted in Japan,<sup>31,33–35</sup> two in India,<sup>23,32</sup> and one  
131 each in the UK,<sup>29</sup> the US,<sup>30</sup> Brazil,<sup>28</sup> and Iraq.<sup>22</sup> One study did not report on the study  
132 location.<sup>29</sup> The sample size varied from 18 to 1,426 among included studies. In one study,  
133 working status was not reported.<sup>30</sup> One study included employed and unemployed  
134 participants.<sup>31</sup> Two studies did not include women,<sup>28,34</sup> and three did not report on sex.<sup>22,23,32</sup>

135 Three studies assessed work stress using the current major measures (Job Demand-  
136 Control Model and Effort-Reward Imbalance Model).<sup>28,34,35</sup> Work stress was assessed using  
137 the Karasek job strain model,<sup>28,34</sup> the Effort-Reward Imbalance model,<sup>35</sup> the Brief Job Stress  
138 Questionnaire developed by referring to the demand-control-support model in Japan,<sup>33</sup> a self-  
139 reported job stress,<sup>23</sup> the Occupational Stress Indicator,<sup>24,29</sup> an occupational stress index by  
140 Srivastava and Singh,<sup>32</sup> the Life events scale,<sup>22,31</sup> and the Problems of Everyday Living Scale



1  
2  
3  
4  
5  
6 141 by Pearlin and Schooler.<sup>30</sup>

7  
8 142 Three studies presented only descriptive statistics.<sup>22,30,32</sup> Eight studies performed  
9  
10 143 regression analyses,<sup>23,24,28,29,31,33–35</sup> but two of the eight studies did not report the types of a  
11  
12 144 regression modeling used.<sup>24,29</sup> Only two studies sufficiently adjusted for potential  
13  
14 145 confounders such as socioeconomic status and work-related variables.<sup>28,35</sup>

### 16 146 **Dental caries and work stress**

17  
18 147 One study reported the cross-sectional association between work stress and dental caries,  
19  
20 148 which included 164 paid male workers aged 35 to 44 years in Brazil.<sup>28</sup> Work stress was  
21  
22 149 assessed according to the Karasek job strain model.<sup>36</sup> Dental caries status was assessed using  
23  
24 150 the DMFS index (the number of decayed [D], missing [M], and filled [F] teeth surfaces per  
25  
26 151 person). After adjusting for covariates, one-point increases in the work mental demand, work  
27  
28 152 control, and work variety scores were associated with 0.19 (95% confidence interval [CI] =  
29  
30 153 -0.91, 1.29), 0.87 (95% CI = -0.18, 1.91), and -0.06 (95% CI = -1.57, 1.45) increases in the  
31  
32 154 DMFS index, respectively, in a multivariable regression analysis. Consequently, this study  
33  
34 155 reported a nonsignificant association between work stress and dental caries.<sup>28</sup>

### 36 156 **Periodontal status and work stress**

37  
38 157 Eight of nine studies reported a significant association between work stress and worse  
39  
40 158 periodontal status.<sup>22–24,28–33</sup> The measurements of periodontal status varied across the  
41  
42 159 included studies. The measurements included probing pocket depth,<sup>22,24,32</sup> clinical attachment  
43  
44 160 level,<sup>22,29,30</sup> alveolar bone loss,<sup>30</sup> gingival index,<sup>22</sup> bleeding on probing,<sup>22</sup> the Community  
45  
46 161 Periodontal Index and Treatment Needs protocol,<sup>23</sup> and a composite outcome, including these  
47  
48 162 measures.<sup>28,33</sup> Eight studies assessed periodontal status based on oral examination with probe,  
49  
50 163 but one study was based on only visual inspection by dentists.<sup>33</sup>

51  
52 164 Among the nine studies, two studies had unclear methodology; therefore, they were  
53  
54 165 categorised as unknown.<sup>24,29</sup> Freeman and Goss assessed work stress and periodontal status

1  
2  
3  
4  
5  
6 166 over a 12-month period.<sup>24</sup> However, they did not clearly report when work stress and  
7  
8 167 periodontal status variables were assessed and how they were used in the statistical models.  
9  
10 168 Linden et al. followed-up patients for 5.5 years, but work stress was only assessed at the  
11  
12 169 follow-up examination, not at the baseline survey.<sup>29</sup>  
13

14 170 Among the remaining seven studies, after excluding the above two studies, three  
15  
16 171 studies presented only descriptive statistics.<sup>22,30,32</sup> The remaining four papers reported  
17  
18 172 significant associations following regression analyses.<sup>23,28,31,33</sup> However, Akhter et al. used  
19  
20 173 general stress questions not specific to work stress and included nonworking adults.<sup>31</sup> Islam  
21  
22 174 et al. used the Brief Job Stress Questionnaire derived from the demand-control-support model  
23  
24 175 in Japan, and periodontal status was assessed based on the visual inspection by dentists.<sup>33</sup>  
25  
26 176 Important potential confounders such as socioeconomic status and work-related variables,  
27  
28 177 were not included. Ramji assessed work stress using a single job stress question and did not  
29  
30 178 adjust for covariates in the statistical models.<sup>23</sup> Marcenes and Sheiham reported a significant  
31  
32 179 association between periodontal status and work stress.<sup>28</sup> Periodontal status was assessed by  
33  
34 180 the presence or absence of gums bleeding on probing or with pockets. The authors divided  
35  
36 181 periodontal measures into groups based on “complete absence of teeth with gums bleeding  
37  
38 182 on probing and with pockets,” or “the presence of any tooth with gums bleeding on probing  
39  
40 183 or pockets,” and defined the latter as those with periodontal disease. After adjusting for  
41  
42 184 covariates, one-point increases in work mental demand scores, work control scores, and work  
43  
44 185 variety scores were associated with ORs of 1.22 (95%CI = 1.06, 1.37), 0.97 (95%CI = 0.88,  
45  
46 186 1.07), and 0.99 (95%CI = 0.85, 1.16), respectively, for having periodontal disease, in a  
47  
48 187 logistic regression model.  
49

### 50 188 **Tooth loss and work stress**

51  
52 189 Two studies on the association between work stress and tooth loss were identified. One of  
53  
54 190 the two reported a significant association between work stress and tooth loss.<sup>34,35</sup> Hayashi et  
55  
56  
57  
58  
59  
60

1  
2  
3  
4  
5  
6 191 al. reported the association between work stress, assessed using the Karasek job strain model,  
7  
8 192 and tooth loss.<sup>34</sup> A total of 322 male workers employed at a manufacturing company were  
9  
10 193 included. They dichotomised the number of tooth loss into  $\leq 3$  and  $\geq 4$ . After adjusting for  
11  
12 194 covariates, high job demand and low control conditions were associated with high odds of  
13  
14 195 having  $\geq 4$  teeth loss but not significant (OR = 1.2 [95% CI = 0.40, 3.42]). This study did not  
15  
16 196 adjust for the important potential confounders such as socioeconomic status and work-related  
17  
18 197 variables. Sato et al. reported the association between work stress, assessed using the effort–  
19  
20 198 reward imbalance model, and self-reported tooth loss.<sup>35</sup> After adjusting for covariates  
21  
22 199 including socioeconomic status and work-related variables, a high effort-reward imbalance  
23  
24 200 ratio was significantly associated with a high prevalence of  $\geq 1$  tooth loss (prevalence ratio =  
25  
26 201 1.20 [95% CI = 1.01, 1.42]).

## 202 **Study quality**

203 Table 2 presents the results of the quality assessments for each study. Eight studies (73%)  
204 had poor quality, while three (27%) were rated as fair. None of the studies addressed question  
205 6 (“For the analyses in this paper, were the exposure(s) of interest measured prior to the  
206 outcome(s) being measured?”); 7 (“Was the timeframe sufficient so that one could  
207 reasonably expect to see an association between exposure and outcome if it existed?”); and  
208 10 (“Was the exposure(s) assessed more than once over time?”); because all the studies were  
209 cross-sectional or the study design was unclear.

210

## 211 **DISCUSSION**

212 This is the first systematic review to evaluate and summarise the existing literature on the  
213 associations between work stress and oral conditions. As our findings showed, only one study  
214 reported on dental caries and periodontal status, nine on periodontal status, and two on tooth  
215 loss. Based on the findings of this review, the evidence is lacking on the association of work

1  
2  
3  
4  
5  
6 216 stress with dental caries and tooth loss. Eight of nine studies reported the significant  
7  
8 217 associations between multiple periodontal measures and work stress.  
9

### 10 218 **Limitations of the review**

11  
12 219 This systematic review has four limitations. First, the systematic literature search, screening,  
13  
14 220 and quality assessments were conducted by only one investigator. A single screening could  
15  
16 221 miss more studies than a double screening.<sup>37</sup> Second, only English language literature was  
17  
18 222 included. Although a systematic review found no bias due to English-language restriction in  
19  
20 223 systematic reviews,<sup>38</sup> this review might include bias. Third, there was no protocol for this  
21  
22 224 systematic review. A priori systematic review protocol registration provides the rigor and  
23  
24 225 trustworthiness of the reviews.<sup>39</sup> This might weaken the rigor and trustworthiness of our  
25  
26 226 review. Finally, a meta-analysis could not be conducted owing to the heterogeneity of the  
27  
28 227 included studies. Work stress was assessed using varied measures. Particularly, only a few  
29  
30 228 studies used the current major measures of work stress. Indicators of periodontal status were  
31  
32 229 also varied. No study used valid epidemiological definitions for periodontal disease as the  
33  
34 230 outcome. The cut-off points differed between the two studies on tooth loss and work stress.  
35  
36 231 Besides, there was only one study on dental caries and work stress. These limitations  
37  
38 232 hindered us from performing a meta-analysis.

### 40 233 **Dental caries and work stress**

41  
42 234 We found only one study on the cross-sectional association between work stress and dental  
43  
44 235 caries.<sup>28</sup> The conclusion was that there was no significant association between work stress  
45  
46 236 and dental caries. However, since the sample size was relatively small (n=164), there is the  
47  
48 237 possibility of a false negative association. Besides, each subscale of the Karasek job strain  
49  
50 238 model was simultaneously included in the statistical model. Generally, in the Karasek job  
51  
52 239 strain model, the recommendation is to use four categories of job strain generated by the  
53  
54 240 interaction of the subscales: High-strain jobs, active jobs, low-strain jobs, and passive jobs.<sup>9</sup>  
55  
56  
57  
58  
59  
60

1  
2  
3  
4  
5  
6 241 Due to the above treatments of the subscales, it is possible that the association was  
7  
8 242 underestimated. Additionally, as there was no cohort study, we could not assess the  
9  
10 243 prospective associations. Considering the above limitations, it was difficult to determine  
11  
12 244 whether work stress is associated with dental caries. A further study should include a cohort  
13  
14 245 design and a relatively large sample size with appropriate work stress measures.

#### 16 246 **Periodontal status and work stress**

18 247 Nine studies reported on the association between work stress and periodontal status.<sup>22–24,28–</sup>  
19  
20 248 <sup>33</sup> However, the outcome measures were varied across the included studies. Although there  
21  
22 249 are the accepted epidemiological definitions of periodontitis according to the European  
23  
24 250 Workshop in Periodontology and the Centers for Disease Control/American Academy of  
25  
26 251 Periodontology,<sup>40,41</sup> there was no study that used the definitions. It means that the included  
27  
28 252 studies reported the associations between work stress and periodontal measures, not  
29  
30 253 periodontal disease. In addition, the measurement of work stress was measured also varied  
31  
32 254 across studies. Each measure assessed different dimensions of work stress.<sup>42</sup> Due to the  
33  
34 255 heterogeneity of exposures and outcomes, we could not conduct a meta-analysis.

36 256 Of the nine studies, only one study adjusted for the potential confounders, such as  
37  
38 257 socioeconomic status and work-related variables.<sup>28</sup> Besides, no cohort study was found. The  
39  
40 258 failure to adjust for the confounders and consider the induction time weakens the research  
41  
42 259 evidence. However, despite the above limitations, the consistent association between work  
43  
44 260 stress and worse periodontal status is noteworthy. To verify the current results, a further  
45  
46 261 cohort study using the validated definitions of periodontal disease and current measurements  
47  
48 262 of work stress, in addition to adjusting for the potential confounders should be performed.

#### 50 263 **Tooth loss and work stress**

52 264 Two studies on the association between work stress and tooth loss were identified. Hayashi's  
53  
54 265 study included only male workers employed at one manufacturing company.<sup>34</sup> In contrast,

1  
2  
3  
4  
5  
6 266 Sato's study included active workers sampled from a general population.<sup>35</sup> However, the  
7  
8 267 response rate was relatively low (32%). The generalisability of both studies could be limited.  
9

10 268 The two studies had different cut-off points of tooth loss. Hayashi's study used the  
11  
12 269 cut-off point of more than 4 teeth lost. The cutoff point is higher than the mean number of  
13  
14 270 teeth loss (at 25 to 34, 35 to 45, 46 to 54, and 55 to 64 years = 0.16, 0.58, 1.48, and 4.00,  
15  
16 271 respectively) reported by the national statistical surveys.<sup>43</sup> This study targeted severe cases  
17  
18 272 only. In Sato's study, the outcome was the loss of at least more than one tooth. However, this  
19  
20 273 outcome relied on self-reported answers; therefore, self-reported bias might exist.

21  
22 274 Both studies showed an increased risk of tooth loss, although only one of the two  
23  
24 275 studies reported a significant association between work stress and tooth loss. However, due  
25  
26 276 to the above limitations, it is difficult to derive any form of conclusion. In the future, a cohort  
27  
28 277 study including general workers should be conducted to confirm these findings.

## 29 30 278 **Conclusions**

31  
32 279 Based on the findings, this systematic review suggests a lack of evidence on the association  
33  
34 280 of work stress with dental caries and tooth loss. Although eight of the nine studies reported  
35  
36 281 significant associations between multiple periodontal measures and work stress, no study  
37  
38 282 used valid epidemiological definitions of periodontal disease. For future research, well-  
39  
40 283 designed cohort studies including potential confounding factors and the use of generally  
41  
42 284 accepted measurements of work stress and periodontal disease are needed.  
43  
44  
45  
46  
47  
48  
49  
50  
51  
52  
53  
54  
55  
56  
57

**Ethical Approval Statement**

Not applicable

**Contributors**

YuS contributed to the acquisition and the interpretation of data and drafting of the work. YaS and EY revised it critically for important intellectual content. All authors contributed to the conception and design of the work, approved the final version to be published, and agreed to be accountable for all aspects of the work in ensuring that questions related to the accuracy or integrity of any part of the work are appropriately investigated and resolved.

**Funding**

This study was supported by Grant-in-Aid for Early-Career Scientists from the Japan Society for the Promotion of Science KAKENHI (grant number JP19K19306).

**Competing interests**

The authors declare no potential conflicts of interest with respect to the research, authorship, and publication of this article.

**Patient consent for publication**

Not required.

**Provenance and peer review**

Not commissioned; externally peer-reviewed.

**Data availability statement**

Not applicable.

## References

1. Bernabe E, Marcenes W, Hernandez CR, et al. Global, Regional, and National Levels and Trends in Burden of Oral Conditions from 1990 to 2017: A Systematic Analysis for the Global Burden of Disease 2017 Study. *J Dent Res* 2020; 99: 362–373.
2. Pitts NB, Zero DT, Marsh PD, et al. Dental caries. *Nat Rev Dis Primer* 2017; 3: 17030.
3. Kinane DF, Stathopoulou PG, Papapanou PN. Periodontal diseases. *Nat Rev Dis Primer* 2017; 3: 17038.
4. Sheiham A, Croog SH. The psychosocial impact of dental diseases on individuals and communities. *J Behav Med* 1981; 4: 257–272.
5. Reisine ST. The Impact of Dental Conditions on Social Functioning and the Quality of Life. *Annu Rev Public Health* 1988; 9: 1–19.
6. Righolt AJ, Jevdjevic M, Marcenes W, et al. Global-, Regional-, and Country-Level Economic Impacts of Dental Diseases in 2015. *J Dent Res* 2018; 97: 501–507.
7. Lundberg U, Cooper C. The New Workplace in a Rapidly Changing World. In: *The science of occupational health: Stress, psychobiology, and the new world of work*. Chichester: Wiley-Blackwell, pp. 11–21.
8. Kivimäki M, Nyberg ST, Batty GD, et al. Job strain as a risk factor for coronary heart disease: a collaborative meta-analysis of individual participant data. *The Lancet* 2012; 380: 1491–1497.
9. Berkman L, Kawachi I, Theorell T. Working Conditions and Health. In: *Social epidemiology*. New York: Oxford University Press, 2014, pp. 153–181.
10. Lundberg U, Cooper C. Stress-Related Health Problems. In: *The science of occupational health: Stress, psychobiology, and the new world of work*. Chichester: Wiley-Blackwell, pp. 75–91.
11. Béjean S, Sultan-Taïeb H. Modeling the economic burden of diseases imputable to stress at work. *Eur J Health Econ* 2005; 6: 16–23.
12. Sabbah W, Gomaa N, Gireesh A. Stress, allostatic load, and periodontal diseases. *Periodontol 2000* 2018; 78: 154–161.
13. Gomaa N, Glogauer M, Tenenbaum H, et al. Social-Biological Interactions in Oral Disease: A ‘Cells to Society’ View. *PLOS ONE* 2016; 11: e0146218.
14. Tikhonova S, Booi L, D’Souza V, et al. Investigating the association between stress, saliva and dental caries: a scoping review. *BMC Oral Health* 2018; 18: 41.



15. Castro MML, Ferreira R de O, Fagundes NCF, et al. Association between Psychological Stress and Periodontitis: A Systematic Review. *Eur J Dent* 2020; 14: 171–179.
16. Lundberg U, Cooper C. Introduction: History of Work and Health. In: *The science of occupational health: Stress, psychobiology, and the new world of work*. Chichester: Wiley-Blackwell, pp. 1–10.
17. Moher D, Liberati A, Tetzlaff J, et al. Preferred reporting items for systematic reviews and meta-analyses: the PRISMA statement. *BMJ* 2009; 339: b2535.
18. Liberati A, Altman DG, Tetzlaff J, et al. The PRISMA statement for reporting systematic reviews and meta-analyses of studies that evaluate healthcare interventions: explanation and elaboration. *BMJ* 2009; 339: b2700.
19. Dekkers OM, Vandembroucke JP, Cevallos M, et al. COSMOS-E: Guidance on conducting systematic reviews and meta-analyses of observational studies of etiology. *PLoS Med* 2019; 16: e1002742–e1002742.
20. Stroup DF, Berlin JA, Morton SC, et al. Meta-analysis of Observational Studies in Epidemiology: A Proposal for Reporting. *JAMA* 2000; 283: 2008–2012.
21. National Institutes of Health. Quality Assessment Tool for Observational Cohort and Cross-Sectional Studies, <https://www.nhlbi.nih.gov/health-topics/study-quality-assessment-tools> (2014, accessed 17 September 2020).
22. Talib Bandar K. The association between periodontal disease and job stress in Baghdad city. *J Kerbala Univ* 2009; 5: 47–57.
23. Ramji R. *Assessing the relationship between occupational stress and periodontitis in industrial workers*. PhD Thesis, Umeå International School of Public Health, 2011.
24. Freeman R, Goss S. Stress measures as predictors of periodontal disease – a preliminary communication. *Community Dent Oral Epidemiol* 1993; 21: 176–177.
25. Atri M, Srivastava D, Kharbanda J, et al. Occupational Stress, Salivary Cortisol, and Periodontal Disease: A Clinical and Laboratory Study [retracted in: *J Int Oral Health*. 2016 May;8(5):650]. *J Int Oral Health JIOH* 2015; 7: 65–69.
26. Yoshiono K, Suzuki S, Ishizuka Y, et al. Relationship between job stress and subjective oral health symptoms in male financial workers in Japan. *Ind Health* 2017; 55: 119–126.
27. Capurro DA, Davidsen M. Socioeconomic inequalities in dental health among middle-aged adults and the role of behavioral and psychosocial factors: evidence from the

1  
2  
3  
4  
5  
6 Spanish National Health Survey. *Int J Equity Health* 2017; 16: 34.

7 28. Segura Marcenes W, Sheiham A. The relationship between work stress and oral  
8 health status. *Soc Sci Med* 1992; 35: 1511–1520.

9  
10 29. Linden GJ, Mullally BH, Freeman R. Stress and the progression of periodontal  
11 disease. *J Clin Periodontol* 1996; 23: 675–680.

12  
13 30. Genco RJ, Ho AW, Grossi SG, et al. Relationship of Stress, Distress, and  
14 Inadequate Coping Behaviors to Periodontal Disease. *J Periodontol* 1999; 70: 711–723.

15  
16 31. Akhter R, Hannan MA, Okhubo R, et al. Relationship between stress factor and  
17 periodontal disease in a rural area population in Japan. *Eur J Med Res* 2005; 10: 352–357.

18  
19 32. Mahendra L, Mahendra J, Austin RD, et al. Stress as an aggravating factor for  
20 periodontal diseases. *J Clin Diagn Res* 2011; 5: 889–93.

21  
22 33. Islam MM, Ekuni D, Yoneda T, et al. Influence of Occupational Stress and Coping  
23 Style on Periodontitis among Japanese Workers: A Cross-Sectional Study. *Int J Environ*  
24 *Res Public Health* 2019; 16: 3540.

25  
26 34. Hayashi N, Tamagawa H, Tanaka M, et al. Association of Tooth Loss with  
27 Psychosocial Factors in Male Japanese Employees. *J Occup Health* 2001; 43: 351–355.

28  
29 35. Sato Y, Tsuboya T, Aida J, et al. Effort-reward imbalance at work and tooth loss: a  
30 cross-sectional study from the J-SHINE project. *Ind Health* 2020; 58: 26–34.

31  
32 36. Karasek RA. Job Demands, Job Decision Latitude, and Mental Strain: Implications  
33 for Job Redesign. *Adm Sci Q* 1979; 24: 285–308.

34  
35 37. Waffenschmidt S, Knellingen M, Sieben W, et al. Single screening versus  
36 conventional double screening for study selection in systematic reviews: a methodological  
37 systematic review. *BMC Med Res Methodol* 2019; 19: 132.

38  
39 38. Morrison A, Polisena J, Husereau D, et al. The effect of English-language  
40 restriction on systematic review-based meta-analyses: a systematic review of empirical  
41 studies. *Int J Technol Assess Health Care* 2012; 28: 138–144.

42  
43 39. Shamseer L, Moher D, Clarke M, et al. Preferred reporting items for systematic  
44 review and meta-analysis protocols (PRISMA-P) 2015: elaboration and explanation. *BMJ*;  
45 349. Epub ahead of print 2015. DOI: 10.1136/bmj.g7647.

46  
47 40. Page RC, Eke PI. Case Definitions for Use in Population-Based Surveillance of  
48 Periodontitis. *J Periodontol* 2007; 78: 1387–1399.

49  
50 41. Tonetti MS, Claffey N, on behalf of the European Workshop in Periodontology  
51 group C. Advances in the progression of periodontitis and proposal of definitions of a  
52  
53  
54  
55  
56  
57

1  
2  
3  
4  
5  
6 periodontitis case and disease progression for use in risk factor research. *J Clin Periodontol*  
7 2005; 32: 210–213.

8 42. Leka S, Jain A, World Health Organization. Health impact of psychosocial hazards  
9 at work: an overview, <https://apps.who.int/iris/handle/10665/44428> (2010).

10 43. Ministry of Health, Labour and Welfare (Japan). *Dental Diseases Survey*,  
11 <https://www.mhlw.go.jp/toukei/list/62-17b.html> (2016, accessed 12 March 2021).  
12  
13  
14  
15  
16  
17  
18  
19  
20  
21  
22  
23  
24  
25  
26  
27  
28  
29  
30  
31  
32  
33  
34  
35  
36  
37  
38  
39  
40  
41  
42  
43  
44  
45  
46  
47  
48  
49  
50  
51  
52  
53  
54  
55  
56  
57  
58  
59  
60

## Tables

Table 1. Summary of included studies on work stress and oral conditions

| Author's name (year of publication)       | Study design    | Study location | Exposure (work stress)                                           | Outcome                                                                                                                                                                                                                                                                         | Number of participants                                                                                                               | Mean age of the participants and proportion of women | Covariates                                                                                                                                                       | Main results                                                                                                                                                                                                                                                                                                                                                                                                                                                |
|-------------------------------------------|-----------------|----------------|------------------------------------------------------------------|---------------------------------------------------------------------------------------------------------------------------------------------------------------------------------------------------------------------------------------------------------------------------------|--------------------------------------------------------------------------------------------------------------------------------------|------------------------------------------------------|------------------------------------------------------------------------------------------------------------------------------------------------------------------|-------------------------------------------------------------------------------------------------------------------------------------------------------------------------------------------------------------------------------------------------------------------------------------------------------------------------------------------------------------------------------------------------------------------------------------------------------------|
| <b>Dental caries</b>                      |                 |                |                                                                  |                                                                                                                                                                                                                                                                                 |                                                                                                                                      |                                                      |                                                                                                                                                                  |                                                                                                                                                                                                                                                                                                                                                                                                                                                             |
| Marcenes and Sheiham (1992) <sup>28</sup> | Cross-sectional | Brazil         | Karasek job strain model                                         | DMFS index (number of decayed (D), missing (M), and Filled (F) teeth surfaces per persons)                                                                                                                                                                                      | 164 male paid workers aged from 35 to 44 years                                                                                       | Mean age = 41.2 (standard deviation = 2.2)<br>0%     | Marital quality, toothbrushing frequency, sugar consumption, age, years of residence, type of toothpaste, frequency dental attendance, and socio-economic status | Work mental demand: Coefficients = 0.19 (95% CI = -0.91, 1.29)<br>Work control: Coefficients = 0.87 (95% CI = -0.18, 1.91)<br>Work variety: Coefficients = -0.06 (95% CI = -1.57, 1.45)<br>From a linear regression analysis                                                                                                                                                                                                                                |
| <b>Periodontal status</b>                 |                 |                |                                                                  |                                                                                                                                                                                                                                                                                 |                                                                                                                                      |                                                      |                                                                                                                                                                  |                                                                                                                                                                                                                                                                                                                                                                                                                                                             |
| Marcenes and Sheiham (1992) <sup>28</sup> | Cross-sectional | Brazil         | Karasek job strain model                                         | The presence or absence of teeth either with gums bleeding on probing or with pockets was used. The indicator was labelled as 'complete absence of teeth with gums bleeding on probing and with pockets', and 'presence of any tooth with gums bleeding on probing or pockets'. | 164 male paid workers aged from 35 to 44 years (16 workers were excluded from 164 participants due to missing values and edentulous) | Mean age = 41.2 (standard deviation = 2.2)<br>0%     | Marital quality, toothbrushing frequency, sugar consumption, age, years of residence, type of toothpaste, frequency dental attendance, and socio-economic status | Work mental demand: Odds ratio = 1.22 (95% confidence interval = 1.06, 1.37)<br>Work control: Odds ratio = 0.97 (95% confidence interval = 0.88, 1.07)<br>Work variety: Odds ratio = 0.99 (95% confidence interval = 0.85, 1.16)<br>From a logistic regression analysis<br>Type A behaviour: Coefficients = 0.41 (p-value=0.003)<br>Work environment (organisation/climate): Coefficients = -0.34 (p-value = 0.007)<br>(statistical model was not reported) |
| Freeman and Goss (1993) <sup>24</sup>     | Unknown         | Not reported   | Occupational Stress Indicator                                    | Mean increases in pocket depth                                                                                                                                                                                                                                                  | 10 women and 8 men from the head office of a large company                                                                           | Mean age = 39<br>55.6%                               | Unknown                                                                                                                                                          | Job satisfaction: Coefficients = -0.014 (p-value < 0.01)<br>Type A: Coefficients = 0.026 (p-value < 0.05)                                                                                                                                                                                                                                                                                                                                                   |
| Linden et al. (1996) <sup>29</sup>        | Unknown         | UK             | Occupational Stress Indicator assessed at the second examination | Changes in clinical attachment level after an interval of 5.5 (SD 0.6) years.                                                                                                                                                                                                   | 23 employed regular dental attendees aged between 20 and 50 years who had moderate or                                                | Mean age = 41.1 (standard deviation = 7.3)<br>43.5%  | Age and social class of the household                                                                                                                            |                                                                                                                                                                                                                                                                                                                                                                                                                                                             |

established periodontitis  
(13 men and 10 women)

Locus of control: Coefficients =  
-0.035 (p-value  $\geq$  0.05)  
(statistical model was not  
reported)

Job strain score among  
Attachment Loss categories  
(mean  $\pm$  standard error)  
Healthy: 2.12  $\pm$  0.05  
Low: 2.09  $\pm$  0.02  
Moderate: 2.16  $\pm$  0.02  
High: 2.09  $\pm$  0.05  
Severe: 2.22  $\pm$  0.05  
(nonsignificant)

From analysis of covariance

Job strain score among Alveolar  
Bone Loss categories (mean  $\pm$   
standard error)

Healthy: 2.12  $\pm$  0.02  
Low: 2.10  $\pm$  0.03  
Moderate: 2.09  $\pm$  0.04  
Severe: 2.19  $\pm$  0.04  
(nonsignificant)

From analysis of covariance

1,426 inhabitants aged  
25 to 74 years (741  
women and 685 men)  
\*working status was  
unknown

Mean age = 48.9  
(standard deviation  
= 13.9)  
52.0%

Age, gender, and levels of  
smoking.

Severity of Attachment Loss  
Healthy (0 to 1 mm clinical  
attachment level), low (1.1 to 2.0  
mm), moderate (2.1 to 3.0 mm),  
high (3.1 to 4.0 mm) and severe  
(4.1 to 8.0 mm)  
Severity of Alveolar Bone Loss  
Healthy (0.4 to 1.9 mm alveolar  
crestal height), low (2.0 to 2.9  
mm), moderate (3.0 to 3.9 mm),  
and severe ( $\geq$ 4.0 mm)

Problems of  
Everyday Living  
Scale of Pearlin and  
Schooler

1,089 employed and  
unemployed residents  
ranging in age from 18  
to 96 years of a farming  
village in the  
northernmost island of  
Japan (531 men and 558  
women)

Mean age = 55.0  
(standard deviation  
= 1.7)  
51.2%

Age, gender, employment  
status, smoking behaviour,  
stress within 1 month, self-  
health-related stress, family  
health-related stress,  
frequency of dental  
attendance, hyperlipidaemia,  
and diabetes mellitus

Mean clinical attachment loss  
<1.5 mm were assigned to a non-  
diseased group and those with  
mean clinical attachment loss  $\geq$ 1.5  
mm were assigned to a diseased  
group

Life events scale  
(yes or no)

Job stress (reference: No): Odds  
ratio = 1.71 (95% confidence  
interval = 1.10, 2.67) from a  
logistic regression analysis

The mean gingival index  
yes = 1.851 and no = 1.586 (p-  
value > 0.05)

64 working dental  
patients of both genders  
with ages ranging from  
23 to 65 years

Mean age and sex  
were not reported.

None

Gingival Index, probing pocket  
depth, bleeding on probing, and  
clinical attachment level

Life events scale  
(yes or no)

Total mean percentage of sites  
with probing pocket depth  $\geq$  4  
mm  
yes = 6.277% and no = 4.762%  
(p-values <0.05)

1  
2  
3  
4  
5  
6  
7  
8  
9  
10  
11  
12  
13  
14  
15  
16  
17  
18  
19  
20  
21  
22  
23  
24  
25  
26  
27  
28  
29  
30  
31  
32  
33  
34  
35  
36  
37  
38  
39  
40  
41  
42  
43  
44  
45  
46  
47

Total mean Bleeding On Probing  
yes = 41.534% and no = 32.137% (p-value > 0.05)

The mean of the clinical attachment level  
yes = 2.837 and no = 2.275 (p-value > 0.05)  
(all p-values from t-test)

Mean Occupational Stress Index Score (standard deviation)  
Control: 79.53 (23.57)  
Test group 1: 133.68 (33.23)  
Test group 2: 158.13 (32.44)  
p-value < 0.001  
(p-values from ANOVA with the Scheffe Test)

|                                      |                 |       |                                                                                                                                       |                                                                                                                                                                                                                                                                                                                           |                                                                                                                                             |                                                                                                                                                                                                                                                                                                              |                                                                                                                                                                         |                                                                                                                                                                                                                                   |
|--------------------------------------|-----------------|-------|---------------------------------------------------------------------------------------------------------------------------------------|---------------------------------------------------------------------------------------------------------------------------------------------------------------------------------------------------------------------------------------------------------------------------------------------------------------------------|---------------------------------------------------------------------------------------------------------------------------------------------|--------------------------------------------------------------------------------------------------------------------------------------------------------------------------------------------------------------------------------------------------------------------------------------------------------------|-------------------------------------------------------------------------------------------------------------------------------------------------------------------------|-----------------------------------------------------------------------------------------------------------------------------------------------------------------------------------------------------------------------------------|
| Mahendra et al. (2011) <sup>32</sup> | Cross-sectional | India | An occupational stress index of Srivastava, A. K. and Singh, A. P.                                                                    | Control group (n=30): probing pocket depth (PPD) ≤ 3 mm<br>Test group 1 (n=40): at least four sites with probing pocket depth > 4mm and ≤ 6 mm<br>Test group 2 (n=30): at least four sites with probing pocket depth > 6mm                                                                                                | 110 police personnel aged 35-48 years with moderate or established periodontitis                                                            | Mean age (standard deviation); control group: 40.23 (3.46); test group 1: 40.42 (3.54); test group 2: 41.18 (3.78)<br>Sex was not reported.<br>Age groups (SS [n=130], LS [n=68])<br>15-19 years: 0%, 1%<br>20-29 years: 38%, 60%<br>30-44 years: 45%, 20%<br>45-64 years: 17%, 19%<br>Sex was not reported. | None                                                                                                                                                                    |                                                                                                                                                                                                                                   |
| Ramji, (2011) <sup>23</sup>          | Cross-sectional | India | Self-reported job stress (having or not)                                                                                              | Community Periodontal Index and Treatment Needs protocol (a tooth scored 3 or 4 indicating increased pocket depth of over 2 mm indicates presence of periodontitis)                                                                                                                                                       | 198 industrial labour full time workers from a small scale sector (SS) and 68 from a large scale sector (LS) between the age of 18-64 years |                                                                                                                                                                                                                                                                                                              | None                                                                                                                                                                    | Having self-reported job stress: Odds ratio = 7.5 (95% confidence interval = 3.7, 15.02) from a logistic regression analysis                                                                                                      |
| Islam et al. (2019) <sup>33</sup>    | Cross-sectional | Japan | Brief Job Stress Questionnaire developed by referring the demand-control-support model in Japan (low stress, High stress-High coping, | No inflammation of the gingiva or redness and/or swelling of the interdental papilla without gingival recession was classified as non-periodontitis, and any redness and/or swelling in the gingiva with gingival recession and/or tooth mobility was classified as periodontitis, based on visual inspection by dentists | 738 workers of a Japanese crane manufacturing company (92 were women)                                                                       | Mean age = 40.7 (standard deviation = 10.5)<br>12.5%                                                                                                                                                                                                                                                         | Age, gender, daily flossing, regular dental checkup, body mass index, sleeping duration, current smoker, daily alcohol drinking, monthly overtime work, and worker type | High stress-High coping: Odds ratio = 0.30 (95% confidence interval = 0.14, 0.66)<br>High stress-Low coping: Odds ratio = 2.79 (95% confidence interval = 1.05, 7.43) (reference: low stress) from a logistic regression analysis |

1 and High stress-low  
2 coping)  
3 \*coping was  
4 assessed using a  
5 questionnaire  
6 developed by a  
7 Japanese company

8 **Tooth loss**

|    |                      |                 |       |                                                                                 |                                                                                   |                                                                                   |                                                         |                                                                                                                                                                                               |                                                                                                                                                                |
|----|----------------------|-----------------|-------|---------------------------------------------------------------------------------|-----------------------------------------------------------------------------------|-----------------------------------------------------------------------------------|---------------------------------------------------------|-----------------------------------------------------------------------------------------------------------------------------------------------------------------------------------------------|----------------------------------------------------------------------------------------------------------------------------------------------------------------|
| 9  |                      |                 |       |                                                                                 |                                                                                   |                                                                                   |                                                         |                                                                                                                                                                                               |                                                                                                                                                                |
| 10 | Hayashi et al.       | Cross-sectional | Japan | Karasek job strain model (high job demand and low control and other categories) | Tooth loss via oral examination ( $\geq 4$ teeth lost and $3 \leq$ teeth lost)    | 252 male workers employed at a manufacturing company aged 20–59 years             | Mean age = 38.7 (standard deviation = 11.0) 0%          | Age, type A behaviour, alexythymia, depression, job satisfaction, and life satisfaction                                                                                                       | High job demand and low control (reference: other categories): Odds ratio = 1.2 (95% confidence interval = 0.40, 3.42) from a logistic regression analysis     |
| 11 | (2001) <sup>34</sup> |                 |       |                                                                                 |                                                                                   |                                                                                   |                                                         |                                                                                                                                                                                               |                                                                                                                                                                |
| 12 |                      |                 |       |                                                                                 |                                                                                   |                                                                                   |                                                         |                                                                                                                                                                                               |                                                                                                                                                                |
| 13 |                      |                 |       |                                                                                 |                                                                                   |                                                                                   |                                                         |                                                                                                                                                                                               |                                                                                                                                                                |
| 14 |                      |                 |       |                                                                                 |                                                                                   |                                                                                   |                                                         |                                                                                                                                                                                               |                                                                                                                                                                |
| 15 |                      |                 |       |                                                                                 |                                                                                   |                                                                                   |                                                         |                                                                                                                                                                                               |                                                                                                                                                                |
| 16 | Sato et al.          | Cross-sectional | Japan | Effort-Reward Imbalance model (having or not)                                   | Self-reported tooth loss Having tooth loss or not (= no experience of tooth loss) | 1,195 employees aged 25–50 years old who work 20 h per week or more (women = 569) | Median age = 37 (1st and 3rd quartiles = 31 and 43) 48% | Age, sex, marital status, annual household income, years of education, employment status, occupation, working hours per week, job position, company size, body mass index, and smoking status | High effort-reward imbalance ratio: Prevalence ratio = 1.20 (95% confidence interval = 1.01, 1.42) from Poisson regression models with a robust error variance |
| 17 | (2020) <sup>35</sup> |                 |       |                                                                                 |                                                                                   |                                                                                   |                                                         |                                                                                                                                                                                               |                                                                                                                                                                |
| 18 |                      |                 |       |                                                                                 |                                                                                   |                                                                                   |                                                         |                                                                                                                                                                                               |                                                                                                                                                                |
| 19 |                      |                 |       |                                                                                 |                                                                                   |                                                                                   |                                                         |                                                                                                                                                                                               |                                                                                                                                                                |
| 20 |                      |                 |       |                                                                                 |                                                                                   |                                                                                   |                                                         |                                                                                                                                                                                               |                                                                                                                                                                |
| 21 |                      |                 |       |                                                                                 |                                                                                   |                                                                                   |                                                         |                                                                                                                                                                                               |                                                                                                                                                                |
| 22 |                      |                 |       |                                                                                 |                                                                                   |                                                                                   |                                                         |                                                                                                                                                                                               |                                                                                                                                                                |

Table 2. Quality assessment of included studies

|                                           | Q1  | Q2  | Q3  | Q4  | Q5  | Q6 | Q7 | Q8  | Q9  | Q10 | Q11 | Q12 | Q13 | Q14 | Quality Rating (Good, Fair, or Poor) |
|-------------------------------------------|-----|-----|-----|-----|-----|----|----|-----|-----|-----|-----|-----|-----|-----|--------------------------------------|
| Marcenes and Sheiham (1992) <sup>28</sup> | Yes | Yes | NR  | Yes | Yes | No | No | Yes | Yes | No  | Yes | Yes | NA  | Yes | Fair                                 |
| Freeman and Goss (1993) <sup>24</sup>     | Yes | Yes | NR  | No  | Yes | No | No | Yes | Yes | No  | Yes | Yes | NA  | No  | Poor                                 |
| Linden et al. (1996) <sup>29</sup>        | Yes | Yes | NR  | Yes | Yes | No | No | Yes | Yes | No  | Yes | Yes | NA  | No  | Poor                                 |
| Genco et al. (1999) <sup>30</sup>         | Yes | Yes | NR  | No  | Yes | No | No | Yes | No  | No  | Yes | Yes | NA  | No  | Poor                                 |
| Akhter et al. (2005) <sup>31</sup>        | Yes | Yes | NR  | No  | Yes | No | No | NA  | No  | No  | Yes | Yes | NA  | No  | Poor                                 |
| Talib Bandar (2009) <sup>22</sup>         | Yes | Yes | NR  | No  | No  | No | No | NA  | No  | No  | Yes | Yes | NA  | No  | Poor                                 |
| Mahendra et al. (2011) <sup>32</sup>      | Yes | Yes | NR  | Yes | Yes | No | No | NA  | Yes | No  | Yes | Yes | NA  | No  | Poor                                 |
| Ramji (2011) <sup>23</sup>                | Yes | Yes | No  | Yes | Yes | No | No | NA  | No  | No  | Yes | Yes | NA  | No  | Poor                                 |
| Islam et al. (2019) <sup>33</sup>         | Yes | Yes | NR  | Yes | Yes | No | No | NA  | No  | No  | Yes | Yes | NA  | No  | Poor                                 |
| Hayashi et al. (2001) <sup>34</sup>       | Yes | Yes | Yes | Yes | Yes | No | No | NA  | Yes | No  | Yes | Yes | NA  | No  | Fair                                 |
| Sato et al. (2020) <sup>35</sup>          | Yes | Yes | No  | Yes | Yes | No | No | NA  | Yes | No  | Yes | No  | NA  | Yes | Fair                                 |

Abbreviation: CD, cannot determine; NA, not applicable; NR, not reported

Q1. Was the research question or objective in this paper clearly stated?

Q2. Was the study population clearly specified and defined?

Q3. Was the participation rate of eligible persons at least 50%?

Q4. Were all the subjects selected or recruited from the same or similar populations (including the same time period)? Were inclusion and exclusion criteria for being in the study prespecified and applied uniformly to all participants?

Q5. Was a sample size justification, power description, or variance and effect estimates provided?

Q6. For the analyses in this paper, were the exposure(s) of interest measured prior to the outcome(s) being measured?

Q7. Was the timeframe sufficient so that one could reasonably expect to see an association between exposure and outcome if it existed?

Q8. For exposures that can vary in amount or level, did the study examine different levels of the exposure as related to the outcome (e.g., categories of



1 exposure, or exposure measured as continuous variable)?

2  
3 Q9. Were the exposure measures (independent variables) clearly defined, valid, reliable, and implemented consistently across all study participants?

4  
5 Q10. Was the exposure(s) assessed more than once over time?

6  
7 Q11. Were the outcome measures (dependent variables) clearly defined, valid, reliable, and implemented consistently across all study participants?

8  
9 Q12. Were the outcome assessors blinded to the exposure status of participants?

10  
11 Q13. Was loss to follow-up after baseline 20% or less?

12  
13 Q14. Were key potential confounding variables measured and adjusted statistically for their impact on the relationship between exposure(s) and  
14 outcome(s)?  
15  
16  
17  
18  
19  
20  
21  
22  
23  
24  
25  
26  
27  
28  
29  
30  
31  
32  
33  
34  
35  
36  
37  
38  
39  
40  
41  
42  
43  
44  
45  
46  
47

1 Figure 1. Flow of search strategy and selection of studies for a systematic review.  
2  
3  
4  
5  
6  
7  
8  
9  
10  
11  
12  
13  
14  
15  
16  
17  
18  
19  
20  
21  
22  
23  
24  
25  
26  
27  
28  
29  
30  
31  
32  
33  
34  
35  
36  
37  
38  
39  
40  
41  
42  
43  
44  
45  
46  
47

For peer review only

1 The search of two databases (PubMed  
2 and Scopus) on August 12, 2020  
3 identified 402 records

4  
5 129 duplicated records were removed

6  
7 The titles and abstracts of 273 records  
8 were screened  
9

10  
11  
12  
13 Among them, 11 articles met the  
14 inclusion criteria  
15  
16

17  
18 Three additional records were identified  
19 through other sources (reference lists and hand  
20 search)  
21

22  
23 Full text assessment of 14 articles were  
24 performed  
25

26  
27 Excluded articles after full-text assessment  
28 (n=3; Retracted [n=1] and used composite  
29 outcome [n=2])  
30

31 Finally, 11 articles were included  
32 (n=1, caries and periodontal status; n=8,  
33 periodontal status, n=2: tooth loss)  
34

1  
2  
3  
4  
5  
6  
7  
8  
9  
10  
11  
12  
13  
14  
15  
16  
17  
18  
19  
20  
21  
22  
23  
24  
25  
26  
27  
28  
29  
30  
31  
32  
33  
34  
35  
36  
37  
38  
39  
40  
41  
42  
43  
44  
45  
46

Supplemental Table 1. The precise search strategies for each database.

| Database | Date            | Combination of terms used                                                     | Limitation | Result |
|----------|-----------------|-------------------------------------------------------------------------------|------------|--------|
| PubMed   | August 12, 2020 | ("job strain" OR "effort reward") AND (dental OR oral)                        | English    | 22     |
| PubMed   | August 12, 2020 | ("job stress" OR "work stress" OR "occupational stress") AND (dental OR oral) | English    | 143    |
| Scopus   | August 12, 2020 | ("job strain" OR "effort reward") AND (dental OR oral)                        | English    | 20     |
| Scopus   | August 12, 2020 | ("job stress" OR "work stress" OR "occupational stress") AND (dental OR oral) | English    | 217    |

For peer review only

## MOOSE Checklist for Meta-analyses of Observational Studies

| Item No                                     | Recommendation                                                                                                                                                                                                                                                               | Reported on Page No       |
|---------------------------------------------|------------------------------------------------------------------------------------------------------------------------------------------------------------------------------------------------------------------------------------------------------------------------------|---------------------------|
| Reporting of background should include      |                                                                                                                                                                                                                                                                              |                           |
| 1                                           | Problem definition                                                                                                                                                                                                                                                           | 5-6                       |
| 2                                           | Hypothesis statement                                                                                                                                                                                                                                                         | 6                         |
| 3                                           | Description of study outcome(s)                                                                                                                                                                                                                                              | 6                         |
| 4                                           | Type of exposure or intervention used                                                                                                                                                                                                                                        | 6                         |
| 5                                           | Type of study designs used                                                                                                                                                                                                                                                   | 6                         |
| 6                                           | Study population                                                                                                                                                                                                                                                             | 6                         |
| Reporting of search strategy should include |                                                                                                                                                                                                                                                                              |                           |
| 7                                           | Qualifications of searchers (eg, librarians and investigators)                                                                                                                                                                                                               | 7                         |
| 8                                           | Search strategy, including time period included in the synthesis and key words                                                                                                                                                                                               | 6-7, Supplemental Table 1 |
| 9                                           | Effort to include all available studies, including contact with authors                                                                                                                                                                                                      | 7                         |
| 10                                          | Databases and registries searched                                                                                                                                                                                                                                            | 6, Supplemental Table 1   |
| 11                                          | Search software used, name and version, including special features used (eg, explosion)                                                                                                                                                                                      | NA                        |
| 12                                          | Use of hand searching (eg, reference lists of obtained articles)                                                                                                                                                                                                             | 7, Supplemental Table 1   |
| 13                                          | List of citations located and those excluded, including justification                                                                                                                                                                                                        | 6                         |
| 14                                          | Method of addressing articles published in languages other than English                                                                                                                                                                                                      | NA                        |
| 15                                          | Method of handling abstracts and unpublished studies                                                                                                                                                                                                                         | 7                         |
| 16                                          | Description of any contact with authors                                                                                                                                                                                                                                      | NA                        |
| Reporting of methods should include         |                                                                                                                                                                                                                                                                              |                           |
| 17                                          | Description of relevance or appropriateness of studies assembled for assessing the hypothesis to be tested                                                                                                                                                                   | 6                         |
| 18                                          | Rationale for the selection and coding of data (eg, sound clinical principles or convenience)                                                                                                                                                                                | 7                         |
| 19                                          | Documentation of how data were classified and coded (eg, multiple raters, blinding and interrater reliability)                                                                                                                                                               | 7                         |
| 20                                          | Assessment of confounding (eg, comparability of cases and controls in studies where appropriate)                                                                                                                                                                             | 7                         |
| 21                                          | Assessment of study quality, including blinding of quality assessors, stratification or regression on possible predictors of study results                                                                                                                                   | 7                         |
| 22                                          | Assessment of heterogeneity                                                                                                                                                                                                                                                  | NA                        |
| 23                                          | Description of statistical methods (eg, complete description of fixed or random effects models, justification of whether the chosen models account for predictors of study results, dose-response models, or cumulative meta-analysis) in sufficient detail to be replicated | 7                         |
| 24                                          | Provision of appropriate tables and graphics                                                                                                                                                                                                                                 | Table 1, Table 2          |
| Reporting of results should include         |                                                                                                                                                                                                                                                                              |                           |
| 25                                          | Graphic summarizing individual study estimates and overall estimate                                                                                                                                                                                                          | NA                        |
| 26                                          | Table giving descriptive information for each study included                                                                                                                                                                                                                 | Table 1                   |
| 27                                          | Results of sensitivity testing (eg, subgroup analysis)                                                                                                                                                                                                                       | NA                        |
| 28                                          | Indication of statistical uncertainty of findings                                                                                                                                                                                                                            | NA                        |

| Item No                                 | Recommendation                                                                                                            | Reported on Page No |
|-----------------------------------------|---------------------------------------------------------------------------------------------------------------------------|---------------------|
| Reporting of discussion should include  |                                                                                                                           |                     |
| 29                                      | Quantitative assessment of bias (eg, publication bias)                                                                    | 11-12               |
| 30                                      | Justification for exclusion (eg, exclusion of non-English language citations)                                             | 11-12               |
| 31                                      | Assessment of quality of included studies                                                                                 | 12-14               |
| Reporting of conclusions should include |                                                                                                                           |                     |
| 32                                      | Consideration of alternative explanations for observed results                                                            | 12-14               |
| 33                                      | Generalization of the conclusions (ie, appropriate for the data presented and within the domain of the literature review) | 12-14               |
| 34                                      | Guidelines for future research                                                                                            | 12-14               |
| 35                                      | Disclosure of funding source                                                                                              | 15                  |

From: Stroup DF, Berlin JA, Morton SC, et al. Meta-analysis of Observational Studies in Epidemiology: A Proposal for Reporting. JAMA. 2000;283(15):2008–2012. doi:10.1001/jama.283.15.2008

Abbreviation: NA, not applicable

# BMJ Open

## Work stress and oral conditions: A systematic review of observational studies

|                                 |                                                                                                                                                                                                                                                                                                                                                                                |
|---------------------------------|--------------------------------------------------------------------------------------------------------------------------------------------------------------------------------------------------------------------------------------------------------------------------------------------------------------------------------------------------------------------------------|
| Journal:                        | <i>BMJ Open</i>                                                                                                                                                                                                                                                                                                                                                                |
| Manuscript ID                   | bmjopen-2020-046532.R3                                                                                                                                                                                                                                                                                                                                                         |
| Article Type:                   | Original research                                                                                                                                                                                                                                                                                                                                                              |
| Date Submitted by the Author:   | 19-Apr-2021                                                                                                                                                                                                                                                                                                                                                                    |
| Complete List of Authors:       | Sato, Yukihiro; Asahikawa Medical University, Division of Public Health and Epidemiology, Department of Social Medicine<br>Saijo, Yasuaki; Asahikawa Medical University, Division of Public Health and Epidemiology, Department of Social Medicine<br>Yoshioka, Eiji ; Asahikawa Medical University, Division of Public Health and Epidemiology, Department of Social Medicine |
| <b>Primary Subject Heading</b>: | Occupational and environmental medicine                                                                                                                                                                                                                                                                                                                                        |
| Secondary Subject Heading:      | Dentistry and oral medicine                                                                                                                                                                                                                                                                                                                                                    |
| Keywords:                       | OCCUPATIONAL & INDUSTRIAL MEDICINE, SOCIAL MEDICINE, EPIDEMIOLOGY                                                                                                                                                                                                                                                                                                              |
|                                 |                                                                                                                                                                                                                                                                                                                                                                                |

SCHOLARONE™  
Manuscripts



I, the Submitting Author has the right to grant and does grant on behalf of all authors of the Work (as defined in the below author licence), an exclusive licence and/or a non-exclusive licence for contributions from authors who are: i) UK Crown employees; ii) where BMJ has agreed a CC-BY licence shall apply, and/or iii) in accordance with the terms applicable for US Federal Government officers or employees acting as part of their official duties; on a worldwide, perpetual, irrevocable, royalty-free basis to BMJ Publishing Group Ltd ("BMJ") its licensees and where the relevant Journal is co-owned by BMJ to the co-owners of the Journal, to publish the Work in this journal and any other BMJ products and to exploit all rights, as set out in our [licence](#).

The Submitting Author accepts and understands that any supply made under these terms is made by BMJ to the Submitting Author unless you are acting as an employee on behalf of your employer or a postgraduate student of an affiliated institution which is paying any applicable article publishing charge ("APC") for Open Access articles. Where the Submitting Author wishes to make the Work available on an Open Access basis (and intends to pay the relevant APC), the terms of reuse of such Open Access shall be governed by a Creative Commons licence – details of these licences and which [Creative Commons](#) licence will apply to this Work are set out in our licence referred to above.

Other than as permitted in any relevant BMJ Author's Self Archiving Policies, I confirm this Work has not been accepted for publication elsewhere, is not being considered for publication elsewhere and does not duplicate material already published. I confirm all authors consent to publication of this Work and authorise the granting of this licence.



**Title**

Work stress and oral conditions: A systematic review of observational studies

**Authors**

Yukihiro Sato, DDS, PhD, 1 E-mail: ys@epid.work

Yasuaki Saijo, MD, PhD, 1, E-mail: y-saijo@asahikawa-med.ac.jp

Eiji Yoshioka, MD, PhD, 1, E-mail: e-yoshi@asahikawa-med.ac.jp

1. Division of Public Health and Epidemiology, Department of Social Medicine, Asahikawa Medical University, Japan

**Corresponding Author**

Yukihiro Sato, D.D.S., Ph.D

E-mail: ys@epid.work

Assistant Professor

Division of Public Health and Epidemiology, Department of Social Medicine, Asahikawa Medical University

078-8510, 1-1-1, Midorigaoka higashi2-jo, Asahikawa-shi, Hokkaido, Japan

TEL: +81 166-68-2404

FAX: +81 166-68-2409

1  
2  
3  
4  
5  
6  
7  
8  
9  
10  
11  
12  
13  
14  
15  
16  
17  
18  
19  
20  
21  
22  
23  
24  
25  
26  
27  
28  
29  
30  
31  
32  
33  
34  
35  
36  
37  
38  
39  
40  
41  
42  
43  
44  
45  
46  
47  
48  
49  
50  
51  
52  
53  
54  
55  
56  
57  
58  
59  
60

## 1 **Abstract (300/300)**

2 **Objectives:** Although psychological stress is a risk factor for oral diseases, there seems to be  
3 no review on work stress. This study aimed to review the evidence on the association between  
4 work stress and oral conditions, including dental caries, periodontal status, and tooth loss.

5 **Design:** A systematic review of published observational studies.

6 **Data sources:** A systematic literature search was conducted in PubMed and Scopus  
7 databases on August 12, 2020.

8 **Study selection:** Articles were screened based on the following inclusion criteria: published  
9 after 1966; in English only; epidemiological studies on humans (except case studies, reviews,  
10 letters, commentaries, and editorials); and examined the association of work stress with  
11 dental caries, periodontal status, and tooth loss.

12 **Data extraction:** Data was extracted from eligible studies. A quality assessment was  
13 conducted using the Quality Assessment Tool for Observational Cohort and Cross-Sectional  
14 Studies.

15 **Results:** Of 402 articles identified, 11 met the inclusion criteria, and one study assessed the  
16 association of work stress with dental caries and periodontal status. Of 11 studies, one  
17 reported a nonsignificant association between work stress and dental caries; eight of nine  
18 studies reported a significant association between work stress and worse periodontal status;  
19 and one of two studies reported a significant association between work stress and tooth loss.  
20 Nine of eleven studies were cross-sectional, while the remaining two studies had unclear  
21 methodology. Only two studies were sufficiently adjusted for potential confounders. Eight  
22 studies assessed work stress but did not use the current major measures. Three studies were  
23 rated as fair, while eight studies had poor quality.

24 **Conclusions:** There is a lack of evidence on the association of work stress with dental caries  
25 and tooth loss. Eight studies suggested potential associations between periodontal status and

1  
2  
3  
4  
5  
6 26 work stress. Cohort studies using the major work stress measures and adjusting for the  
7  
8 27 potential confounders are needed.  
9

10 28

11  
12 29 **Keywords**

13  
14 30 systematic review, work stress, job stress, occupational stress, oral health, oral diseases  
15  
16  
17  
18  
19  
20  
21  
22  
23  
24  
25  
26  
27  
28  
29  
30  
31  
32  
33  
34  
35  
36  
37  
38  
39  
40  
41  
42  
43  
44  
45  
46  
47  
48  
49  
50  
51  
52  
53  
54  
55  
56  
57  
58  
59  
60

For peer review only

1  
2  
3  
4  
5  
6 31 **Strengths and limitations of this study**  
7

8 32 ► This is the first systematic review to evaluate and summarise the literature on the  
9  
10 33 association between work stress and oral conditions, including dental caries, periodontal  
11  
12 34 status, and tooth loss.

13  
14 35 ► This systematic review provides a comprehensive insight into the quality of the included  
15  
16 36 papers.

17  
18 37 ► The systematic literature search, screening, and quality assessments were conducted by  
19  
20 38 only one investigator.

21  
22 39 ► A meta-analysis could not be conducted because of the heterogeneity of work stress  
23  
24 40 measures and outcome definitions.  
25  
26  
27  
28  
29  
30  
31  
32  
33  
34  
35  
36  
37  
38  
39  
40  
41  
42  
43  
44  
45  
46  
47  
48  
49  
50  
51  
52  
53  
54  
55  
56  
57  
58  
59  
60

## 41 INTRODUCTION

42 Oral diseases, such as dental caries and periodontal disease, are a major health concern  
43 worldwide. The Global Burden of Disease study has estimated that 2.3 billion individuals  
44 had untreated dental caries, 796 million had severe periodontal disease, and 267 million had  
45 a complete loss of natural teeth in 2017.<sup>1</sup> Dental caries is the destruction of dental hard tissues  
46 in the crowns and roots of the teeth.<sup>2</sup> Periodontal diseases are chronic inflammatory  
47 conditions with disorders of the tissues surrounding and supporting the teeth.<sup>3</sup> Tooth loss is  
48 mainly the consequence of dental caries and periodontal disease.<sup>2,3</sup> Because oral diseases  
49 result in severe toothache and eating, sleeping, and communication disabilities,<sup>4,5</sup> poor oral  
50 conditions can restrict work performance<sup>4,5</sup> and create a significant economic burden.<sup>6</sup> Indeed,  
51 work productivity loss due to oral conditions is estimated at 187.61 billion US dollars  
52 annually.<sup>6</sup> The necessity of preventing oral diseases for working adults is highlighted.

53 Since the 1990s, rapid changes in the global economy and the diverse markets have  
54 occurred, and psychological workplace stress has become more prevalent and severe,  
55 especially among industrialised countries.<sup>7</sup> Indeed, Kivimäki et al. reported a 15% prevalence  
56 of job strain measured using job-content and demand-control questionnaires from 13  
57 European cohorts' data (1985–2006).<sup>8</sup> Besides, work stress can have profound effects on  
58 health. There is accumulating evidence of the risk of work stress on cancer, cardiovascular  
59 diseases, diabetes, and depression.<sup>9,10</sup> Béjean and Sultan-Taïeb estimated that the work-  
60 related stress costs due to illnesses could range between €1,167 million and €1,975 million  
61 in France in 2000.<sup>11</sup> Work stress affects workers' health and productivity.

62 Psychological stress is recognised as a risk factor for dental caries and periodontal  
63 diseases. Psychological stress is related to oral diseases through immune system dysfunction,  
64 increased stress hormones, cariogenic bacterial counts, and poor oral health behaviours.<sup>12,13</sup>  
65 Work stress is strongly linked with psychological and physical health.<sup>9,10</sup> Previous systematic

1  
2  
3  
4  
5  
6 66 reviews suggested potential associations of psychological stress with dental caries and  
7  
8 67 periodontitis.<sup>14,15</sup> However, there seems to be no review on the association between work  
9  
10 68 stress and oral diseases. Today, work stress has become an increasingly serious problem.  
11  
12 69 Besides, the number of women in the workforce and dual-earner families have been  
13  
14 70 increasing.<sup>16</sup> A wide range of populations can suffer the risk of oral diseases from exposure  
15  
16 71 to work stress. Thus, the aim of this systematic review was to evaluate and summarise the  
17  
18 72 literature on the association between work stress and oral conditions, including dental caries,  
19  
20 73 periodontal status, and tooth loss. We set the following review question: Is work stress  
21  
22 74 associated with dental caries, periodontal status, and tooth loss among working adults?  
23  
24  
25

## 76 **METHODS**

26  
27  
28 77 The reporting of this systematic review conforms to the Preferred Reporting Items for  
29  
30 78 Systematic Reviews and Meta-Analyses (PRISMA) guidelines.<sup>17,18</sup> We also followed the  
31  
32 79 Conducting Systematic Reviews and Meta-Analyses of Observational Studies of Etiology  
33  
34 80 (COSMOS-E) guidance<sup>19</sup> and the reporting of Meta-analysis Of Observational Studies in  
35  
36 81 Epidemiology (MOOSE).<sup>20</sup> The protocol of this systematic review was not registered.

### 38 **Eligibility criteria**

39  
40 83 Published studies were eligible if they: 1) were published in English; 2) were epidemiological  
41  
42 84 studies on humans (except case studies, reviews, letters, commentaries, and editorials); and  
43  
44 85 3) examined the association of work stress with dental caries, periodontal status, and tooth  
45  
46 86 loss.

### 48 **Information sources and searches**

49  
50 88 On August 12, 2020, we identified potentially relevant published studies in PubMed (1966  
51  
52 89 to August 12, 2020) and Scopus (1966 to August 12, 2020) databases. As PubMed and  
53  
54 90 Scopus have only data back to 1966, we focused on articles published after 1966. We used  
55  
56  
57

1  
2  
3  
4  
5  
6 91 the following script to obtain a wide range of literature: ("job strain" OR "effort reward")  
7  
8 92 AND (dental OR oral); ("job stress" OR "work stress" OR "occupational stress") AND  
9  
10 93 (dental OR oral). The details of the search strategies for each database are shown in  
11  
12 94 Supplemental Table 1. Besides, we manually hand-searched for potentially suitable studies  
13  
14 95 through the reference lists of identified articles and Google scholar. After excluding duplicate  
15  
16 96 articles, one author (YuS) assessed the titles and abstracts according to the aforementioned  
17  
18 97 criteria. Then, eligible studies were selected for the full-text review.

#### 98 **Data extraction**

99 One author (YuS) extracted the following information from each eligible study: 1) name of  
100 the first author; 2) study design; 3) study location (country); 4) number of participants and  
101 work-related characteristics; 5) exposure and its measurements; 6) outcome and its  
102 measurements; 7) age range and proportion of women; 8) covariates included in the adjusted  
103 models; and 9) the main results. The results were shown in Table 1.

#### 104 **Quality assessment**

105 We used the Quality Assessment Tool for Observational Cohort and Cross-Sectional Studies  
106 to assess the quality of included studies.<sup>21</sup> This tool includes 14 questions for evaluating the  
107 internal validity of a study and these questions are documented in the footnote of Table 2.  
108 For each question, one author (YuS) rated them as yes, no, or other (including cannot  
109 determine, not reported, and not applicable). The overall quality rating for the study was  
110 regarded as good if all the domains were assessed favourably.

#### 111 **Synthesis of results**

112 A meta-analysis could not be conducted because of the heterogeneity of work stress measures  
113 and outcome definitions.

#### 114 **Patient and public involvement**

115 No patient involved.

116

## 117 **RESULTS**

118 Figure 1 presents the flow diagram of information through the phases of the systematic  
119 review. Of the 402 articles identified in PubMed and Scopus databases, 129 duplicated  
120 articles were removed, the titles and abstracts of 273 were screened, and 11 met the eligibility  
121 criteria. Three more articles identified through reference lists and hand-search were added.  
122 One article was identified by a hand-search using Google Scholar,<sup>22</sup> one was from a reference  
123 list,<sup>23</sup> and the third was an article<sup>24</sup> plagiarised by a retraction paper. Because the article<sup>24</sup>  
124 which was plagiarised by the retracted one was published officially and has not been retracted,  
125 it was included in our references. After full-text assessments of 14 articles, three were  
126 excluded due to retraction (n=1) and the use of composite outcomes including dental caries  
127 and periodontal status (n=2).<sup>25,26</sup> Finally, 11 articles were included in this systematic  
128 review.<sup>22-24,27-34</sup>

### 129 **Study characteristics of individual studies**

130 Table 1 shows the 12 summaries from the 11 studies. One of eleven studies reported on dental  
131 caries and periodontal status,<sup>27</sup> eight reported on periodontal status,<sup>22-24,28-32</sup> and two reported  
132 on tooth loss.<sup>33,34</sup> Three studies were conducted in Japan,<sup>30,32-34</sup> two in India,<sup>24,31</sup> and one  
133 each in the UK,<sup>28</sup> the US,<sup>29</sup> Brazil,<sup>27</sup> and Iraq.<sup>22</sup> One study did not report on the study  
134 location.<sup>28</sup> The sample size varied from 18 to 1,426 among included studies. In one study,  
135 working status was not reported.<sup>29</sup> One study included employed and unemployed  
136 participants.<sup>30</sup> Two studies did not include women,<sup>27,33</sup> and three did not report on sex.<sup>22,24,31</sup>

137 Three studies assessed work stress using the current major measures (Job Demand-  
138 Control Model and Effort-Reward Imbalance Model).<sup>27,33,34</sup> Work stress was assessed using  
139 the Karasek job strain model,<sup>27,33</sup> the Effort-Reward Imbalance model,<sup>34</sup> the Brief Job Stress  
140 Questionnaire developed by referring to the demand-control-support model in Japan,<sup>32</sup> a self-



1  
2  
3  
4  
5  
6 141 reported job stress,<sup>24</sup> the Occupational Stress Indicator,<sup>23,28</sup> an occupational stress index by  
7  
8 142 Srivastava and Singh,<sup>31</sup> the Life events scale,<sup>22,30</sup> and the Problems of Everyday Living Scale  
9  
10 143 by Pearlin and Schooler.<sup>29</sup>  
11

12 144 Three studies presented only descriptive statistics.<sup>22,29,31</sup> Eight studies performed  
13  
14 145 regression analyses;<sup>23,24,27,28,30,32–34</sup> but two of the eight studies did not report the types of a  
15  
16 146 regression modeling used.<sup>23,28</sup> Only two studies sufficiently adjusted for potential  
17  
18 147 confounders such as socioeconomic status and work-related variables.<sup>27,34</sup>  
19

### 20 148 **Dental caries and work stress**

21  
22 149 One study reported the cross-sectional association between work stress and dental caries,  
23  
24 150 which included 164 paid male workers aged 35 to 44 years in Brazil.<sup>27</sup> Work stress was  
25  
26 151 assessed according to the Karasek job strain model.<sup>35</sup> Dental caries status was assessed using  
27  
28 152 the DMFS index (the number of decayed [D], missing [M], and filled [F] teeth surfaces per  
29  
30 153 person). After adjusting for covariates, one-point increases in the work mental demand, work  
31  
32 154 control, and work variety scores were associated with 0.19 (95% confidence interval [CI] =  
33  
34 155 -0.91, 1.29), 0.87 (95% CI = -0.18, 1.91), and -0.06 (95% CI = -1.57, 1.45) increases in the  
35  
36 156 DMFS index, respectively, in a multivariable regression analysis. Consequently, this study  
37  
38 157 reported a nonsignificant association between work stress and dental caries.<sup>27</sup>  
39

### 40 158 **Periodontal status and work stress**

41  
42 159 Eight of nine studies reported a significant association between work stress and worse  
43  
44 160 periodontal status.<sup>22–24,27–32</sup> The measurements of periodontal status varied across the  
45  
46 161 included studies. The measurements included probing pocket depth,<sup>22,23,31</sup> clinical attachment  
47  
48 162 level,<sup>22,28,29</sup> alveolar bone loss,<sup>29</sup> gingival index,<sup>22</sup> bleeding on probing,<sup>22</sup> the Community  
49  
50 163 Periodontal Index and Treatment Needs protocol,<sup>24</sup> and a composite outcome, including these  
51  
52 164 measures.<sup>27,32</sup> Eight studies assessed periodontal status based on oral examination with probe,  
53  
54 165 but one study was based on only visual inspection by dentists.<sup>32</sup>  
55  
56  
57  
58  
59  
60

1  
2  
3  
4  
5  
6 166 Among the nine studies, two studies had unclear methodology; therefore, they were  
7  
8 167 categorised as unknown.<sup>23,28</sup> Freeman and Goss assessed work stress and periodontal status  
9  
10 168 over a 12-month period.<sup>23</sup> However, they did not clearly report when work stress and  
11  
12 169 periodontal status variables were assessed and how they were used in the statistical models.  
13  
14 170 Linden et al. followed-up patients for 5.5 years, but work stress was only assessed at the  
15  
16 171 follow-up examination, not at the baseline survey.<sup>28</sup>

17 172 Among the remaining seven studies, after excluding the above two studies, three  
18  
19 173 studies presented only descriptive statistics.<sup>22,29,31</sup> The remaining four papers reported  
20  
21 174 significant associations following regression analyses.<sup>24,27,30,32</sup> However, Akhter et al. used  
22  
23 175 general stress questions not specific to work stress and included nonworking adults.<sup>30</sup> Islam  
24  
25 176 et al. used the Brief Job Stress Questionnaire derived from the demand-control-support model  
26  
27 177 in Japan, and periodontal status was assessed based on the visual inspection by dentists.<sup>32</sup>  
28  
29 178 Important potential confounders such as socioeconomic status and work-related variables,  
30  
31 179 were not included. Ramji assessed work stress using a single job stress question and did not  
32  
33 180 adjust for covariates in the statistical models.<sup>24</sup> Marcenes and Sheiham reported a significant  
34  
35 181 association between periodontal status and work stress.<sup>27</sup> Periodontal status was assessed by  
36  
37 182 the presence or absence of gums bleeding on probing or with pockets. The authors divided  
38  
39 183 periodontal measures into groups based on “complete absence of teeth with gums bleeding  
40  
41 184 on probing and with pockets,” or “the presence of any tooth with gums bleeding on probing  
42  
43 185 or pockets,” and defined the latter as those with periodontal disease. After adjusting for  
44  
45 186 covariates, one-point increases in work mental demand scores, work control scores, and work  
46  
47 187 variety scores were associated with ORs of 1.22 (95%CI = 1.06, 1.37), 0.97 (95%CI = 0.88,  
48  
49 188 1.07), and 0.99 (95%CI = 0.85, 1.16), respectively, for having periodontal disease, in a  
50  
51 189 logistic regression model.

#### 52 53 54 190 **Tooth loss and work stress**

1  
2  
3  
4  
5  
6 191 Two studies on the association between work stress and tooth loss were identified. One of  
7  
8 192 the two reported a significant association between work stress and tooth loss.<sup>33,34</sup> Hayashi et  
9  
10 193 al. reported the association between work stress, assessed using the Karasek job strain model,  
11  
12 194 and tooth loss.<sup>33</sup> A total of 322 male workers employed at a manufacturing company were  
13  
14 195 included. They dichotomised the number of tooth loss into  $\leq 3$  and  $\geq 4$ . After adjusting for  
15  
16 196 covariates, high job demand and low control conditions were associated with high odds of  
17  
18 197 having  $\geq 4$  teeth loss but not significant (OR = 1.2 [95% CI = 0.40, 3.42]). This study did not  
19  
20 198 adjust for the important potential confounders such as socioeconomic status and work-related  
21  
22 199 variables. Sato et al. reported the association between work stress, assessed using the effort–  
23  
24 200 reward imbalance model, and self-reported tooth loss.<sup>34</sup> After adjusting for covariates  
25  
26 201 including socioeconomic status and work-related variables, a high effort-reward imbalance  
27  
28 202 ratio was significantly associated with a high prevalence of  $\geq 1$  tooth loss (prevalence ratio =  
29  
30 203 1.20 [95% CI = 1.01, 1.42]).

### 32 204 **Study quality**

34 205 Table 2 presents the results of the quality assessments for each study. Eight studies (73%)  
35  
36 206 had poor quality, while three (27%) were rated as fair. None of the studies addressed question  
37  
38 207 6 (“For the analyses in this paper, were the exposure(s) of interest measured prior to the  
39  
40 208 outcome(s) being measured?”); 7 (“Was the timeframe sufficient so that one could  
41  
42 209 reasonably expect to see an association between exposure and outcome if it existed?”); and  
43  
44 210 10 (“Was the exposure(s) assessed more than once over time?”); because all the studies were  
45  
46 211 cross-sectional or the study design was unclear.

48 212

### 50 213 **DISCUSSION**

52 214 This is the first systematic review to evaluate and summarise the existing literature on the  
53  
54 215 associations between work stress and oral conditions. As our findings showed, only one study

1  
2  
3  
4  
5  
6 216 reported on dental caries and periodontal status, nine on periodontal status, and two on tooth  
7  
8 217 loss. Based on the findings of this review, the evidence is lacking on the association of work  
9  
10 218 stress with dental caries and tooth loss. Eight of nine studies reported the significant  
11  
12 219 associations between multiple periodontal measures and work stress.

### 14 220 **Limitations of the review**

16 221 This systematic review has four limitations. First, the systematic literature search, screening,  
17  
18 222 and quality assessments were conducted by only one investigator. A single screening could  
19  
20 223 miss more studies than a double screening.<sup>36</sup> Second, only English language literature was  
21  
22 224 included. Although a systematic review found no bias due to English-language restriction in  
23  
24 225 systematic reviews,<sup>37</sup> this review might include bias. Third, there was no protocol for this  
25  
26 226 systematic review. A priori systematic review protocol registration provides the rigor and  
27  
28 227 trustworthiness of the reviews.<sup>38</sup> This might weaken the rigor and trustworthiness of our  
29  
30 228 review. Finally, a meta-analysis could not be conducted owing to the heterogeneity of the  
31  
32 229 included studies. Work stress was assessed using varied measures. Particularly, only a few  
33  
34 230 studies used the current major measures of work stress. Indicators of periodontal status were  
35  
36 231 also varied. No study used valid epidemiological definitions for periodontal disease as the  
37  
38 232 outcome. The cut-off points differed between the two studies on tooth loss and work stress.  
39  
40 233 Besides, there was only one study on dental caries and work stress. These limitations  
41  
42 234 hindered us from performing a meta-analysis.

### 44 235 **Dental caries and work stress**

46 236 We found only one study on the cross-sectional association between work stress and dental  
47  
48 237 caries.<sup>27</sup> The conclusion was that there was no significant association between work stress  
49  
50 238 and dental caries. However, since the sample size was relatively small (n=164), there is the  
51  
52 239 possibility of a false negative association. Besides, each subscale of the Karasek job strain  
53  
54 240 model was simultaneously included in the statistical model. Generally, in the Karasek job

1  
2  
3  
4  
5  
6 241 strain model, the recommendation is to use four categories of job strain generated by the  
7  
8 242 interaction of the subscales: High-strain jobs, active jobs, low-strain jobs, and passive jobs.<sup>9</sup>  
9  
10 243 Due to the above treatments of the subscales, it is possible that the association was  
11  
12 244 underestimated. Additionally, as there was no cohort study, we could not assess the  
13  
14 245 prospective associations. Considering the above limitations, it was difficult to determine  
15  
16 246 whether work stress is associated with dental caries. A further study should include a cohort  
17  
18 247 design and a relatively large sample size with appropriate work stress measures.

#### 20 248 **Periodontal status and work stress**

21  
22 249 Nine studies reported on the association between work stress and periodontal status.<sup>22–24,27–</sup>  
23  
24 250 <sup>32</sup> However, the outcome measures were varied across the included studies. Although there  
25  
26 251 are the accepted epidemiological definitions of periodontitis according to the European  
27  
28 252 Workshop in Periodontology and the Centers for Disease Control/American Academy of  
29  
30 253 Periodontology,<sup>39,40</sup> there was no study that used the definitions. It means that the included  
31  
32 254 studies reported the associations between work stress and periodontal measures, not  
33  
34 255 periodontal disease. In addition, the measurement of work stress was measured also varied  
35  
36 256 across studies. Each measure assessed different dimensions of work stress.<sup>41</sup> Due to the  
37  
38 257 heterogeneity of exposures and outcomes, we could not conduct a meta-analysis.

39  
40 258 Of the nine studies, only one study adjusted for the potential confounders, such as  
41  
42 259 socioeconomic status and work-related variables.<sup>27</sup> Besides, no cohort study was found. The  
43  
44 260 failure to adjust for the confounders and consider the induction time weakens the research  
45  
46 261 evidence. However, despite the above limitations, the consistent association between work  
47  
48 262 stress and worse periodontal status is noteworthy. To verify the current results, a further  
49  
50 263 cohort study using the validated definitions of periodontal disease and current measurements  
51  
52 264 of work stress, in addition to adjusting for the potential confounders should be performed.

#### 54 265 **Tooth loss and work stress**

1  
2  
3  
4  
5  
6 266 Two studies on the association between work stress and tooth loss were identified. Hayashi's  
7  
8 267 study included only male workers employed at one manufacturing company.<sup>33</sup> In contrast,  
9  
10 268 Sato's study included active workers sampled from a general population.<sup>34</sup> However, the  
11  
12 269 response rate was relatively low (32%). The generalisability of both studies could be limited.

13  
14 270 The two studies had different cut-off points of tooth loss. Hayashi's study used the  
15  
16 271 cut-off point of more than 4 teeth lost. The cutoff point is higher than the mean number of  
17  
18 272 teeth loss (at 25 to 34, 35 to 45, 46 to 54, and 55 to 64 years = 0.16, 0.58, 1.48, and 4.00,  
19  
20 273 respectively) reported by the national statistical surveys.<sup>42</sup> This study targeted severe cases  
21  
22 274 only. In Sato's study, the outcome was the loss of at least more than one tooth. However, this  
23  
24 275 outcome relied on self-reported answers; therefore, self-reported bias might exist.

25  
26 276 Both studies showed an increased risk of tooth loss, although only one of the two  
27  
28 277 studies reported a significant association between work stress and tooth loss. However, due  
29  
30 278 to the above limitations, it is difficult to derive any form of conclusion. In the future, a cohort  
31  
32 279 study including general workers should be conducted to confirm these findings.

### 33 34 280 **Conclusions**

35  
36 281 Based on the findings, this systematic review suggests a lack of evidence on the association  
37  
38 282 of work stress with dental caries and tooth loss. Although eight of the nine studies reported  
39  
40 283 significant associations between multiple periodontal measures and work stress, no study  
41  
42 284 used valid epidemiological definitions of periodontal disease. For future research, well-  
43  
44 285 designed cohort studies including potential confounding factors and the use of generally  
45  
46 286 accepted measurements of work stress and periodontal disease are needed.

**Ethical Approval Statement**

Not applicable

**Contributors**

YuS contributed to the acquisition and the interpretation of data and drafting of the work. YaS and EY revised it critically for important intellectual content. All authors contributed to the conception and design of the work, approved the final version to be published, and agreed to be accountable for all aspects of the work in ensuring that questions related to the accuracy or integrity of any part of the work are appropriately investigated and resolved.

**Funding**

This study was supported by Grant-in-Aid for Early-Career Scientists from the Japan Society for the Promotion of Science KAKENHI (grant number JP19K19306).

**Competing interests**

The authors declare no potential conflicts of interest with respect to the research, authorship, and publication of this article.

**Patient consent for publication**

Not required.

**Provenance and peer review**

Not commissioned; externally peer-reviewed.

**Data availability statement**

Not applicable.

## References

1. Bernabe E, Marcenes W, Hernandez CR, et al. Global, Regional, and National Levels and Trends in Burden of Oral Conditions from 1990 to 2017: A Systematic Analysis for the Global Burden of Disease 2017 Study. *J Dent Res* 2020; 99: 362–373.
2. Pitts NB, Zero DT, Marsh PD, et al. Dental caries. *Nat Rev Dis Primer* 2017; 3: 17030.
3. Kinane DF, Stathopoulou PG, Papapanou PN. Periodontal diseases. *Nat Rev Dis Primer* 2017; 3: 17038.
4. Sheiham A, Croog SH. The psychosocial impact of dental diseases on individuals and communities. *J Behav Med* 1981; 4: 257–272.
5. Reisine ST. The Impact of Dental Conditions on Social Functioning and the Quality of Life. *Annu Rev Public Health* 1988; 9: 1–19.
6. Righolt AJ, Jevdjevic M, Marcenes W, et al. Global-, Regional-, and Country-Level Economic Impacts of Dental Diseases in 2015. *J Dent Res* 2018; 97: 501–507.
7. Lundberg U, Cooper C. The New Workplace in a Rapidly Changing World. In: *The science of occupational health: Stress, psychobiology, and the new world of work*. Chichester: Wiley-Blackwell, pp. 11–21.
8. Kivimäki M, Nyberg ST, Batty GD, et al. Job strain as a risk factor for coronary heart disease: a collaborative meta-analysis of individual participant data. *The Lancet* 2012; 380: 1491–1497.
9. Berkman L, Kawachi I, Theorell T. Working Conditions and Health. In: *Social epidemiology*. New York: Oxford University Press, 2014, pp. 153–181.
10. Lundberg U, Cooper C. Stress-Related Health Problems. In: *The science of occupational health: Stress, psychobiology, and the new world of work*. Chichester: Wiley-Blackwell, pp. 75–91.
11. Béjean S, Sultan-Taïeb H. Modeling the economic burden of diseases imputable to stress at work. *Eur J Health Econ* 2005; 6: 16–23.
12. Sabbah W, Gomaa N, Gireesh A. Stress, allostatic load, and periodontal diseases. *Periodontol 2000* 2018; 78: 154–161.
13. Gomaa N, Glogauer M, Tenenbaum H, et al. Social-Biological Interactions in Oral Disease: A ‘Cells to Society’ View. *PLOS ONE* 2016; 11: e0146218.
14. Tikhonova S, Boonij L, D’Souza V, et al. Investigating the association between stress, saliva and dental caries: a scoping review. *BMC Oral Health* 2018; 18: 41.



15. Castro MML, Ferreira R de O, Fagundes NCF, et al. Association between Psychological Stress and Periodontitis: A Systematic Review. *Eur J Dent* 2020; 14: 171–179.
16. Lundberg U, Cooper C. Introduction: History of Work and Health. In: *The science of occupational health: Stress, psychobiology, and the new world of work*. Chichester: Wiley-Blackwell, pp. 1–10.
17. Moher D, Liberati A, Tetzlaff J, et al. Preferred reporting items for systematic reviews and meta-analyses: the PRISMA statement. *BMJ* 2009; 339: b2535.
18. Liberati A, Altman DG, Tetzlaff J, et al. The PRISMA statement for reporting systematic reviews and meta-analyses of studies that evaluate healthcare interventions: explanation and elaboration. *BMJ* 2009; 339: b2700.
19. Dekkers OM, Vandenbroucke JP, Cevallos M, et al. COSMOS-E: Guidance on conducting systematic reviews and meta-analyses of observational studies of etiology. *PLoS Med* 2019; 16: e1002742–e1002742.
20. Stroup DF, Berlin JA, Morton SC, et al. Meta-analysis of Observational Studies in Epidemiology: A Proposal for Reporting. *JAMA* 2000; 283: 2008–2012.
21. National Institutes of Health. Quality Assessment Tool for Observational Cohort and Cross-Sectional Studies, <https://www.nhlbi.nih.gov/health-topics/study-quality-assessment-tools> (2014, accessed 17 September 2020).
22. Talib Bandar K. The association between periodontal disease and job stress in Baghdad city. *J Kerbala Univ* 2009; 5: 47–57.
23. Freeman R, Goss S. Stress measures as predictors of periodontal disease – a preliminary communication. *Community Dent Oral Epidemiol* 1993; 21: 176–177.
24. Ramji R. *Assessing the relationship between occupational stress and periodontitis in industrial workers*. PhD Thesis, Umeå International School of Public Health, 2011.
25. Yoshiono K, Suzuki S, Ishizuka Y, et al. Relationship between job stress and subjective oral health symptoms in male financial workers in Japan. *Ind Health* 2017; 55: 119–126.
26. Capurro DA, Davidsen M. Socioeconomic inequalities in dental health among middle-aged adults and the role of behavioral and psychosocial factors: evidence from the Spanish National Health Survey. *Int J Equity Health* 2017; 16: 34.
27. Segura Marcenes W, Sheiham A. The relationship between work stress and oral health status. *Soc Sci Med* 1992; 35: 1511–1520.

- 1
- 2
- 3
- 4
- 5
- 6 28. Linden GJ, Mullally BH, Freeman R. Stress and the progression of periodontal
- 7 disease. *J Clin Periodontol* 1996; 23: 675–680.
- 8
- 9 29. Genco RJ, Ho AW, Grossi SG, et al. Relationship of Stress, Distress, and
- 10 Inadequate Coping Behaviors to Periodontal Disease. *J Periodontol* 1999; 70: 711–723.
- 11
- 12 30. Akhter R, Hannan MA, Okhubo R, et al. Relationship between stress factor and
- 13 periodontal disease in a rural area population in Japan. *Eur J Med Res* 2005; 10: 352–357.
- 14
- 15 31. Mahendra L, Mahendra J, Austin RD, et al. Stress as an aggravating factor for
- 16 periodontal diseases. *J Clin Diagn Res* 2011; 5: 889–93.
- 17
- 18 32. Islam MM, Ekuni D, Yoneda T, et al. Influence of Occupational Stress and Coping
- 19 Style on Periodontitis among Japanese Workers: A Cross-Sectional Study. *Int J Environ*
- 20 *Res Public Health* 2019; 16: 3540.
- 21
- 22 33. Hayashi N, Tamagawa H, Tanaka M, et al. Association of Tooth Loss with
- 23 Psychosocial Factors in Male Japanese Employees. *J Occup Health* 2001; 43: 351–355.
- 24
- 25 34. Sato Y, Tsuboya T, Aida J, et al. Effort-reward imbalance at work and tooth loss: a
- 26 cross-sectional study from the J-SHINE project. *Ind Health* 2020; 58: 26–34.
- 27
- 28 35. Karasek RA. Job Demands, Job Decision Latitude, and Mental Strain: Implications
- 29 for Job Redesign. *Adm Sci Q* 1979; 24: 285–308.
- 30
- 31 36. Waffenschmidt S, Knelangen M, Sieben W, et al. Single screening versus
- 32 conventional double screening for study selection in systematic reviews: a methodological
- 33 systematic review. *BMC Med Res Methodol* 2019; 19: 132.
- 34
- 35 37. Morrison A, Polisena J, Husereau D, et al. The effect of English-language
- 36 restriction on systematic review-based meta-analyses: a systematic review of empirical
- 37 studies. *Int J Technol Assess Health Care* 2012; 28: 138–144.
- 38
- 39 38. Shamseer L, Moher D, Clarke M, et al. Preferred reporting items for systematic
- 40 review and meta-analysis protocols (PRISMA-P) 2015: elaboration and explanation. *BMJ*;
- 41 349. Epub ahead of print 2015. DOI: 10.1136/bmj.g7647.
- 42
- 43 39. Page RC, Eke PI. Case Definitions for Use in Population-Based Surveillance of
- 44 Periodontitis. *J Periodontol* 2007; 78: 1387–1399.
- 45
- 46 40. Tonetti MS, Claffey N, on behalf of the European Workshop in Periodontology
- 47 group C. Advances in the progression of periodontitis and proposal of definitions of a
- 48 periodontitis case and disease progression for use in risk factor research. *J Clin Periodontol*
- 49 2005; 32: 210–213.
- 50
- 51 41. Leka S, Jain A, World Health Organization. Health impact of psychosocial hazards
- 52
- 53
- 54
- 55
- 56
- 57
- 58
- 59
- 60

1  
2  
3  
4  
5  
6 at work: an overview, <https://apps.who.int/iris/handle/10665/44428> (2010).

7 42. Ministry of Health, Labour and Welfare (Japan). *Dental Diseases Survey*,  
8 <https://www.mhlw.go.jp/toukei/list/62-17b.html> (2016, accessed 12 March 2021).  
9  
10  
11  
12  
13  
14  
15  
16  
17  
18  
19  
20  
21  
22  
23  
24  
25  
26  
27  
28  
29  
30  
31  
32  
33  
34  
35  
36  
37  
38  
39  
40  
41  
42  
43  
44  
45  
46  
47  
48  
49  
50  
51  
52  
53  
54  
55  
56  
57  
58  
59  
60

For peer review only

## Tables

Table 1. Summary of included studies on work stress and oral conditions

| Author's name (year of publication)       | Study design    | Study location | Exposure (work stress)                                           | Outcome                                                                                                                                                                                                                                                                         | Number of participants                                                                                                               | Mean age of the participants and proportion of women | Covariates                                                                                                                                                       | Main results                                                                                                                                                                                                                                                                                                                                                                                                                                                |
|-------------------------------------------|-----------------|----------------|------------------------------------------------------------------|---------------------------------------------------------------------------------------------------------------------------------------------------------------------------------------------------------------------------------------------------------------------------------|--------------------------------------------------------------------------------------------------------------------------------------|------------------------------------------------------|------------------------------------------------------------------------------------------------------------------------------------------------------------------|-------------------------------------------------------------------------------------------------------------------------------------------------------------------------------------------------------------------------------------------------------------------------------------------------------------------------------------------------------------------------------------------------------------------------------------------------------------|
| <b>Dental caries</b>                      |                 |                |                                                                  |                                                                                                                                                                                                                                                                                 |                                                                                                                                      |                                                      |                                                                                                                                                                  |                                                                                                                                                                                                                                                                                                                                                                                                                                                             |
| Marcenes and Sheiham (1992) <sup>27</sup> | Cross-sectional | Brazil         | Karasek job strain model                                         | DMFS index (number of decayed (D), missing (M), and Filled (F) teeth surfaces per persons)                                                                                                                                                                                      | 164 male paid workers aged from 35 to 44 years                                                                                       | Mean age = 41.2 (standard deviation = 2.2)<br>0%     | Marital quality, toothbrushing frequency, sugar consumption, age, years of residence, type of toothpaste, frequency dental attendance, and socio-economic status | Work mental demand: Coefficients = 0.19 (95% CI = -0.91, 1.29)<br>Work control: Coefficients = 0.87 (95% CI = -0.18, 1.91)<br>Work variety: Coefficients = -0.06 (95% CI = -1.57, 1.45)<br>From a linear regression analysis                                                                                                                                                                                                                                |
| <b>Periodontal status</b>                 |                 |                |                                                                  |                                                                                                                                                                                                                                                                                 |                                                                                                                                      |                                                      |                                                                                                                                                                  |                                                                                                                                                                                                                                                                                                                                                                                                                                                             |
| Marcenes and Sheiham (1992) <sup>27</sup> | Cross-sectional | Brazil         | Karasek job strain model                                         | The presence or absence of teeth either with gums bleeding on probing or with pockets was used. The indicator was labelled as 'complete absence of teeth with gums bleeding on probing and with pockets', and 'presence of any tooth with gums bleeding on probing or pockets'. | 164 male paid workers aged from 35 to 44 years (16 workers were excluded from 164 participants due to missing values and edentulous) | Mean age = 41.2 (standard deviation = 2.2)<br>0%     | Marital quality, toothbrushing frequency, sugar consumption, age, years of residence, type of toothpaste, frequency dental attendance, and socio-economic status | Work mental demand: Odds ratio = 1.22 (95% confidence interval = 1.06, 1.37)<br>Work control: Odds ratio = 0.97 (95% confidence interval = 0.88, 1.07)<br>Work variety: Odds ratio = 0.99 (95% confidence interval = 0.85, 1.16)<br>From a logistic regression analysis<br>Type A behaviour: Coefficients = 0.41 (p-value=0.003)<br>Work environment (organisation/climate): Coefficients = -0.34 (p-value = 0.007)<br>(statistical model was not reported) |
| Freeman and Goss (1993) <sup>23</sup>     | Unknown         | Not reported   | Occupational Stress Indicator                                    | Mean increases in pocket depth                                                                                                                                                                                                                                                  | 10 women and 8 men from the head office of a large company                                                                           | Mean age = 39<br>55.6%                               | Unknown                                                                                                                                                          | Job satisfaction: Coefficients = -0.014 (p-value < 0.01)<br>Type A: Coefficients = 0.026 (p-value < 0.05)                                                                                                                                                                                                                                                                                                                                                   |
| Linden et al. (1996) <sup>28</sup>        | Unknown         | UK             | Occupational Stress Indicator assessed at the second examination | Changes in clinical attachment level after an interval of 5.5 (SD 0.6) years.                                                                                                                                                                                                   | 23 employed regular dental attendees aged between 20 and 50 years who had moderate or                                                | Mean age = 41.1 (standard deviation = 7.3)<br>43.5%  | Age and social class of the household                                                                                                                            |                                                                                                                                                                                                                                                                                                                                                                                                                                                             |

established periodontitis  
(13 men and 10 women)

Locus of control: Coefficients =  
-0.035 (p-value  $\geq$  0.05)  
(statistical model was not  
reported)

Job strain score among  
Attachment Loss categories  
(mean  $\pm$  standard error)  
Healthy: 2.12  $\pm$  0.05  
Low: 2.09  $\pm$  0.02  
Moderate: 2.16  $\pm$  0.02  
High: 2.09  $\pm$  0.05  
Severe: 2.22  $\pm$  0.05  
(nonsignificant)

From analysis of covariance

Job strain score among Alveolar  
Bone Loss categories (mean  $\pm$   
standard error)

Healthy: 2.12  $\pm$  0.02  
Low: 2.10  $\pm$  0.03  
Moderate: 2.09  $\pm$  0.04  
Severe: 2.19  $\pm$  0.04  
(nonsignificant)

From analysis of covariance

1,426 inhabitants aged  
25 to 74 years (741  
women and 685 men)  
\*working status was  
unknown

Mean age = 48.9  
(standard deviation  
= 13.9)  
52.0%

Age, gender, and levels of  
smoking.

Severity of Attachment Loss  
Healthy (0 to 1 mm clinical  
attachment level), low (1.1 to 2.0  
mm), moderate (2.1 to 3.0 mm),  
high (3.1 to 4.0 mm) and severe  
(4.1 to 8.0 mm)  
Severity of Alveolar Bone Loss  
Healthy (0.4 to 1.9 mm alveolar  
crestal height), low (2.0 to 2.9  
mm), moderate (3.0 to 3.9 mm),  
and severe ( $\geq$ 4.0 mm)

Problems of  
Everyday Living  
Scale of Pearlin and  
Schooler

1,089 employed and  
unemployed residents  
ranging in age from 18  
to 96 years of a farming  
village in the  
northernmost island of  
Japan (531 men and 558  
women)

Mean age = 55.0  
(standard deviation  
= 1.7)  
51.2%

Age, gender, employment  
status, smoking behaviour,  
stress within 1 month, self-  
health-related stress, family  
health-related stress,  
frequency of dental  
attendance, hyperlipidaemia,  
and diabetes mellitus

Mean clinical attachment loss  
<1.5 mm were assigned to a non-  
diseased group and those with  
mean clinical attachment loss  $\geq$ 1.5  
mm were assigned to a diseased  
group

Life events scale  
(yes or no)

Job stress (reference: No): Odds  
ratio = 1.71 (95% confidence  
interval = 1.10, 2.67) from a  
logistic regression analysis

The mean gingival index  
yes = 1.851 and no = 1.586 (p-  
value > 0.05)

64 working dental  
patients of both genders  
with ages ranging from  
23 to 65 years

Mean age and sex  
were not reported.

None

Gingival Index, probing pocket  
depth, bleeding on probing, and  
clinical attachment level

Life events scale  
(yes or no)

Total mean percentage of sites  
with probing pocket depth  $\geq$  4  
mm  
yes = 6.277% and no = 4.762%  
(p-values <0.05)

1  
2  
3  
4  
5  
6  
7  
8  
9  
10  
11  
12  
13  
14  
15  
16  
17  
18  
19  
20  
21  
22  
23  
24  
25  
26  
27  
28  
29  
30  
31  
32  
33  
34  
35  
36  
37  
38  
39  
40  
41  
42  
43  
44  
45  
46  
47

Total mean Bleeding On Probing  
yes = 41.534% and no = 32.137% (p-value > 0.05)

The mean of the clinical attachment level  
yes = 2.837 and no = 2.275 (p-value > 0.05)  
(all p-values from t-test)

Mean Occupational Stress Index Score (standard deviation)  
Control: 79.53 (23.57)  
Test group 1: 133.68 (33.23)  
Test group 2: 158.13 (32.44)  
p-value <0.001  
(p-values from ANOVA with the Scheffe Test)

Having self-reported job stress:  
Odds ratio = 7.5 (95% confidence interval = 3.7, 15.02) from a logistic regression analysis

High stress-High coping: Odds ratio = 0.30 (95% confidence interval = 0.14, 0.66)  
High stress-Low coping: Odds ratio = 2.79 (95% confidence interval = 1.05, 7.43) (reference: low stress) from a logistic regression analysis

|                                      |                 |       |                                                                                                                                       |                                                                                                                                                                                                                                                                                                                           |                                                                                                                                             |                                                                                                                                                                                                                                                                                                              |                                                                                                                                                                         |
|--------------------------------------|-----------------|-------|---------------------------------------------------------------------------------------------------------------------------------------|---------------------------------------------------------------------------------------------------------------------------------------------------------------------------------------------------------------------------------------------------------------------------------------------------------------------------|---------------------------------------------------------------------------------------------------------------------------------------------|--------------------------------------------------------------------------------------------------------------------------------------------------------------------------------------------------------------------------------------------------------------------------------------------------------------|-------------------------------------------------------------------------------------------------------------------------------------------------------------------------|
| Mahendra et al. (2011) <sup>31</sup> | Cross-sectional | India | An occupational stress index of Srivastava, A. K. and Singh, A. P.                                                                    | Control group (n=30): probing pocket depth (PPD) ≤ 3 mm<br>Test group 1 (n=40): at least four sites with probing pocket depth > 4mm and ≤ 6 mm<br>Test group 2 (n=30): at least four sites with probing pocket depth > 6mm                                                                                                | 110 police personnel aged 35-48 years with moderate or established periodontitis                                                            | Mean age (standard deviation); control group: 40.23 (3.46); test group 1: 40.42 (3.54); test group 2: 41.18 (3.78)<br>Sex was not reported.<br>Age groups (SS [n=130], LS [n=68])<br>15-19 years: 0%, 1%<br>20-29 years: 38%, 60%<br>30-44 years: 45%, 20%<br>45-64 years: 17%, 19%<br>Sex was not reported. | None                                                                                                                                                                    |
| Ramji, (2011) <sup>24</sup>          | Cross-sectional | India | Self-reported job stress (having or not)                                                                                              | Community Periodontal Index and Treatment Needs protocol (a tooth scored 3 or 4 indicating increased pocket depth of over 2 mm indicates presence of periodontitis)                                                                                                                                                       | 198 industrial labour full time workers from a small scale sector (SS) and 68 from a large scale sector (LS) between the age of 18-64 years |                                                                                                                                                                                                                                                                                                              | None                                                                                                                                                                    |
| Islam et al. (2019) <sup>32</sup>    | Cross-sectional | Japan | Brief Job Stress Questionnaire developed by referring the demand-control-support model in Japan (low stress, High stress-High coping, | No inflammation of the gingiva or redness and/or swelling of the interdental papilla without gingival recession was classified as non-periodontitis, and any redness and/or swelling in the gingiva with gingival recession and/or tooth mobility was classified as periodontitis, based on visual inspection by dentists | 738 workers of a Japanese crane manufacturing company (92 were women)                                                                       | Mean age = 40.7 (standard deviation = 10.5)<br>12.5%                                                                                                                                                                                                                                                         | Age, gender, daily flossing, regular dental checkup, body mass index, sleeping duration, current smoker, daily alcohol drinking, monthly overtime work, and worker type |

1 and High stress-low  
2 coping)  
3 \*coping was  
4 assessed using a  
5 questionnaire  
6 developed by a  
7 Japanese company

8 **Tooth loss**

|    |                      |                 |       |                                                                                 |                                                                                   |                                                                                   |                                                         |                                                                                                                                                                                               |                                                                                                                                                                |
|----|----------------------|-----------------|-------|---------------------------------------------------------------------------------|-----------------------------------------------------------------------------------|-----------------------------------------------------------------------------------|---------------------------------------------------------|-----------------------------------------------------------------------------------------------------------------------------------------------------------------------------------------------|----------------------------------------------------------------------------------------------------------------------------------------------------------------|
| 9  |                      |                 |       |                                                                                 |                                                                                   |                                                                                   |                                                         |                                                                                                                                                                                               |                                                                                                                                                                |
| 10 | Hayashi et al.       | Cross-sectional | Japan | Karasek job strain model (high job demand and low control and other categories) | Tooth loss via oral examination ( $\geq 4$ teeth lost and $3 \leq$ teeth lost)    | 252 male workers employed at a manufacturing company aged 20–59 years             | Mean age = 38.7 (standard deviation = 11.0) 0%          | Age, type A behaviour, alexythymia, depression, job satisfaction, and life satisfaction                                                                                                       | High job demand and low control (reference: other categories): Odds ratio = 1.2 (95% confidence interval = 0.40, 3.42) from a logistic regression analysis     |
| 11 | (2001) <sup>33</sup> |                 |       |                                                                                 |                                                                                   |                                                                                   |                                                         |                                                                                                                                                                                               |                                                                                                                                                                |
| 12 |                      |                 |       |                                                                                 |                                                                                   |                                                                                   |                                                         |                                                                                                                                                                                               |                                                                                                                                                                |
| 13 |                      |                 |       |                                                                                 |                                                                                   |                                                                                   |                                                         |                                                                                                                                                                                               |                                                                                                                                                                |
| 14 |                      |                 |       |                                                                                 |                                                                                   |                                                                                   |                                                         |                                                                                                                                                                                               |                                                                                                                                                                |
| 15 |                      |                 |       |                                                                                 |                                                                                   |                                                                                   |                                                         |                                                                                                                                                                                               |                                                                                                                                                                |
| 16 | Sato et al.          | Cross-sectional | Japan | Effort-Reward Imbalance model (having or not)                                   | Self-reported tooth loss Having tooth loss or not (= no experience of tooth loss) | 1,195 employees aged 25–50 years old who work 20 h per week or more (women = 569) | Median age = 37 (1st and 3rd quartiles = 31 and 43) 48% | Age, sex, marital status, annual household income, years of education, employment status, occupation, working hours per week, job position, company size, body mass index, and smoking status | High effort-reward imbalance ratio: Prevalence ratio = 1.20 (95% confidence interval = 1.01, 1.42) from Poisson regression models with a robust error variance |
| 17 | (2020) <sup>34</sup> |                 |       |                                                                                 |                                                                                   |                                                                                   |                                                         |                                                                                                                                                                                               |                                                                                                                                                                |
| 18 |                      |                 |       |                                                                                 |                                                                                   |                                                                                   |                                                         |                                                                                                                                                                                               |                                                                                                                                                                |
| 19 |                      |                 |       |                                                                                 |                                                                                   |                                                                                   |                                                         |                                                                                                                                                                                               |                                                                                                                                                                |
| 20 |                      |                 |       |                                                                                 |                                                                                   |                                                                                   |                                                         |                                                                                                                                                                                               |                                                                                                                                                                |
| 21 |                      |                 |       |                                                                                 |                                                                                   |                                                                                   |                                                         |                                                                                                                                                                                               |                                                                                                                                                                |
| 22 |                      |                 |       |                                                                                 |                                                                                   |                                                                                   |                                                         |                                                                                                                                                                                               |                                                                                                                                                                |

Table 2. Quality assessment of included studies

|                                           | Q1  | Q2  | Q3  | Q4  | Q5  | Q6 | Q7 | Q8  | Q9  | Q10 | Q11 | Q12 | Q13 | Q14 | Quality Rating (Good, Fair, or Poor) |
|-------------------------------------------|-----|-----|-----|-----|-----|----|----|-----|-----|-----|-----|-----|-----|-----|--------------------------------------|
| Marcenes and Sheiham (1992) <sup>27</sup> | Yes | Yes | NR  | Yes | Yes | No | No | Yes | Yes | No  | Yes | Yes | NA  | Yes | Fair                                 |
| Freeman and Goss (1993) <sup>23</sup>     | Yes | Yes | NR  | No  | Yes | No | No | Yes | Yes | No  | Yes | Yes | NA  | No  | Poor                                 |
| Linden et al. (1996) <sup>28</sup>        | Yes | Yes | NR  | Yes | Yes | No | No | Yes | Yes | No  | Yes | Yes | NA  | No  | Poor                                 |
| Genco et al. (1999) <sup>29</sup>         | Yes | Yes | NR  | No  | Yes | No | No | Yes | No  | No  | Yes | Yes | NA  | No  | Poor                                 |
| Akhter et al. (2005) <sup>30</sup>        | Yes | Yes | NR  | No  | Yes | No | No | NA  | No  | No  | Yes | Yes | NA  | No  | Poor                                 |
| Talib Bandar (2009) <sup>22</sup>         | Yes | Yes | NR  | No  | No  | No | No | NA  | No  | No  | Yes | Yes | NA  | No  | Poor                                 |
| Mahendra et al. (2011) <sup>31</sup>      | Yes | Yes | NR  | Yes | Yes | No | No | NA  | Yes | No  | Yes | Yes | NA  | No  | Poor                                 |
| Ramji (2011) <sup>24</sup>                | Yes | Yes | No  | Yes | Yes | No | No | NA  | No  | No  | Yes | Yes | NA  | No  | Poor                                 |
| Islam et al. (2019) <sup>32</sup>         | Yes | Yes | NR  | Yes | Yes | No | No | NA  | No  | No  | Yes | Yes | NA  | No  | Poor                                 |
| Hayashi et al. (2001) <sup>33</sup>       | Yes | Yes | Yes | Yes | Yes | No | No | NA  | Yes | No  | Yes | Yes | NA  | No  | Fair                                 |
| Sato et al. (2020) <sup>34</sup>          | Yes | Yes | No  | Yes | Yes | No | No | NA  | Yes | No  | Yes | No  | NA  | Yes | Fair                                 |

Abbreviation: CD, cannot determine; NA, not applicable; NR, not reported

Q1. Was the research question or objective in this paper clearly stated?

Q2. Was the study population clearly specified and defined?

Q3. Was the participation rate of eligible persons at least 50%?

Q4. Were all the subjects selected or recruited from the same or similar populations (including the same time period)? Were inclusion and exclusion criteria for being in the study prespecified and applied uniformly to all participants?

Q5. Was a sample size justification, power description, or variance and effect estimates provided?

Q6. For the analyses in this paper, were the exposure(s) of interest measured prior to the outcome(s) being measured?

Q7. Was the timeframe sufficient so that one could reasonably expect to see an association between exposure and outcome if it existed?

Q8. For exposures that can vary in amount or level, did the study examine different levels of the exposure as related to the outcome (e.g., categories of



1 exposure, or exposure measured as continuous variable)?

2  
3 Q9. Were the exposure measures (independent variables) clearly defined, valid, reliable, and implemented consistently across all study participants?

4  
5 Q10. Was the exposure(s) assessed more than once over time?

6  
7 Q11. Were the outcome measures (dependent variables) clearly defined, valid, reliable, and implemented consistently across all study participants?

8  
9 Q12. Were the outcome assessors blinded to the exposure status of participants?

10  
11 Q13. Was loss to follow-up after baseline 20% or less?

12  
13 Q14. Were key potential confounding variables measured and adjusted statistically for their impact on the relationship between exposure(s) and  
14 outcome(s)?  
15  
16  
17  
18  
19  
20  
21  
22  
23  
24  
25  
26  
27  
28  
29  
30  
31  
32  
33  
34  
35  
36  
37  
38  
39  
40  
41  
42  
43  
44  
45  
46  
47

1 Figure 1. Flow of search strategy and selection of studies for a systematic review.  
2  
3  
4  
5  
6  
7  
8  
9  
10  
11  
12  
13  
14  
15  
16  
17  
18  
19  
20  
21  
22  
23  
24  
25  
26  
27  
28  
29  
30  
31  
32  
33  
34  
35  
36  
37  
38  
39  
40  
41  
42  
43  
44  
45  
46  
47

For peer review only

1 The search of two databases (PubMed  
2 and Scopus) on August 12, 2020  
3 identified 402 records

4  
5 129 duplicated records were removed

6  
7 The titles and abstracts of 273 records  
8 were screened  
9

10  
11  
12  
13 Among them, 11 articles met the  
14 inclusion criteria  
15  
16

17  
18 Three additional records were identified  
19 through other sources (reference lists and hand  
20 search)  
21

22  
23 Full text assessment of 14 articles were  
24 performed  
25

26  
27 Excluded articles after full-text assessment  
28 (n=3; Retracted [n=1] and used composite  
29 outcome [n=2])  
30

31 Finally, 11 articles were included  
32 (n=1, caries and periodontal status; n=8,  
33 periodontal status, n=2: tooth loss)  
34

Supplemental Table 1. The precise search strategies for each database.

| Database | Date            | Combination of terms used                                                     | Limitation | Result |
|----------|-----------------|-------------------------------------------------------------------------------|------------|--------|
| PubMed   | August 12, 2020 | ("job strain" OR "effort reward") AND (dental OR oral)                        | English    | 22     |
| PubMed   | August 12, 2020 | ("job stress" OR "work stress" OR "occupational stress") AND (dental OR oral) | English    | 143    |
| Scopus   | August 12, 2020 | ("job strain" OR "effort reward") AND (dental OR oral)                        | English    | 20     |
| Scopus   | August 12, 2020 | ("job stress" OR "work stress" OR "occupational stress") AND (dental OR oral) | English    | 217    |

For peer review only

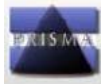

# PRISMA 2009 Checklist

1  
2  
3  
4  
5  
6  
7  
8  
9  
10  
11  
12  
13  
14  
15  
16  
17  
18  
19  
20  
21  
22  
23  
24  
25  
26  
27  
28  
29  
30  
31  
32  
33  
34  
35  
36  
37  
38  
39  
40  
41  
42  
43  
44  
45  
46  
47

| Section/topic                      | #  | Checklist item                                                                                                                                                                                                                                                                                              | Reported on page # |
|------------------------------------|----|-------------------------------------------------------------------------------------------------------------------------------------------------------------------------------------------------------------------------------------------------------------------------------------------------------------|--------------------|
| <b>TITLE</b>                       |    |                                                                                                                                                                                                                                                                                                             |                    |
| Title                              | 1  | Identify the report as a systematic review, meta-analysis, or both.                                                                                                                                                                                                                                         | p1                 |
| <b>ABSTRACT</b>                    |    |                                                                                                                                                                                                                                                                                                             |                    |
| Structured summary                 | 2  | Provide a structured summary including, as applicable: background; objectives; data sources; study eligibility criteria, participants, and interventions; study appraisal and synthesis methods; results; limitations; conclusions and implications of key findings; systematic review registration number. | p2, 3              |
| <b>INTRODUCTION</b>                |    |                                                                                                                                                                                                                                                                                                             |                    |
| Rationale                          | 3  | Describe the rationale for the review in the context of what is already known.                                                                                                                                                                                                                              | p5, 6              |
| Objectives                         | 4  | Provide an explicit statement of questions being addressed with reference to participants, interventions, comparisons, outcomes, and study design (PICOS).                                                                                                                                                  | p6                 |
| <b>METHODS</b>                     |    |                                                                                                                                                                                                                                                                                                             |                    |
| Protocol and registration          | 5  | Indicate if a review protocol exists, if and where it can be accessed (e.g., Web address), and, if available, provide registration information including registration number.                                                                                                                               | Not applicable     |
| Eligibility criteria               | 6  | Specify study characteristics (e.g., PICOS, length of follow-up) and report characteristics (e.g., years considered, language, publication status) used as criteria for eligibility, giving rationale.                                                                                                      | p6                 |
| Information sources                | 7  | Describe all information sources (e.g., databases with dates of coverage, contact with study authors to identify additional studies) in the search and date last searched.                                                                                                                                  | p6                 |
| Search                             | 8  | Present full electronic search strategy for at least one database, including any limits used, such that it could be repeated.                                                                                                                                                                               | p6, 7              |
| Study selection                    | 9  | State the process for selecting studies (i.e., screening, eligibility, included in systematic review, and, if applicable, included in the meta-analysis).                                                                                                                                                   | p6, 7              |
| Data collection process            | 10 | Describe method of data extraction from reports (e.g., piloted forms, independently, in duplicate) and any processes for obtaining and confirming data from investigators.                                                                                                                                  | p7                 |
| Data items                         | 11 | List and define all variables for which data were sought (e.g., PICOS, funding sources) and any assumptions and simplifications made.                                                                                                                                                                       | p7                 |
| Risk of bias in individual studies | 12 | Describe methods used for assessing risk of bias of individual studies (including specification of whether this was done at the study or outcome level), and how this information is to be used in any data synthesis.                                                                                      | p7                 |
| Summary measures                   | 13 | State the principal summary measures (e.g., risk ratio, difference in means).                                                                                                                                                                                                                               | Not applicable     |

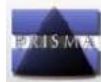

# PRISMA 2009 Checklist

Page 1 of 2

| Synthesis of results          | 14 | Describe the methods of handling data and combining results of studies, if done, including measures of consistency (e.g., $I^2$ ) for each meta-analysis.                                                | Not applicable     |
|-------------------------------|----|----------------------------------------------------------------------------------------------------------------------------------------------------------------------------------------------------------|--------------------|
| Page 1 of 2                   |    |                                                                                                                                                                                                          |                    |
| Section/topic                 | #  | Checklist item                                                                                                                                                                                           | Reported on page # |
| Risk of bias across studies   | 15 | Specify any assessment of risk of bias that may affect the cumulative evidence (e.g., publication bias, selective reporting within studies).                                                             | Not applicable     |
| Additional analyses           | 16 | Describe methods of additional analyses (e.g., sensitivity or subgroup analyses, meta-regression), if done, indicating which were pre-specified.                                                         | Not applicable     |
| <b>RESULTS</b>                |    |                                                                                                                                                                                                          |                    |
| Study selection               | 17 | Give numbers of studies screened, assessed for eligibility, and included in the review, with reasons for exclusions at each stage, ideally with a flow diagram.                                          | p8                 |
| Study characteristics         | 18 | For each study, present characteristics for which data were extracted (e.g., study size, PICOS, follow-up period) and provide the citations.                                                             | p8, 9              |
| Risk of bias within studies   | 19 | Present data on risk of bias of each study and, if available, any outcome level assessment (see item 12).                                                                                                | p11                |
| Results of individual studies | 20 | For all outcomes considered (benefits or harms), present, for each study: (a) simple summary data for each intervention group (b) effect estimates and confidence intervals, ideally with a forest plot. | p8-11              |
| Synthesis of results          | 21 | Present results of each meta-analysis done, including confidence intervals and measures of consistency.                                                                                                  | Not applicable     |
| Risk of bias across studies   | 22 | Present results of any assessment of risk of bias across studies (see Item 15).                                                                                                                          | Not applicable     |
| Additional analysis           | 23 | Give results of additional analyses, if done (e.g., sensitivity or subgroup analyses, meta-regression [see Item 16]).                                                                                    | Not applicable     |
| <b>DISCUSSION</b>             |    |                                                                                                                                                                                                          |                    |
| Summary of evidence           | 24 | Summarize the main findings including the strength of evidence for each main outcome; consider their relevance to key groups (e.g., healthcare providers, users, and policy makers).                     | p11, 12            |
| Limitations                   | 25 | Discuss limitations at study and outcome level (e.g., risk of bias), and at review-level (e.g., incomplete retrieval of identified research, reporting bias).                                            | p12                |
| Conclusions                   | 26 | Provide a general interpretation of the results in the context of other evidence, and implications for future research.                                                                                  | p14                |
| <b>FUNDING</b>                |    |                                                                                                                                                                                                          |                    |



# PRISMA 2009 Checklist

1  
2  
3  
4  
5  
6  
7  
8  
9  
10  
11  
12  
13  
14  
15  
16  
17  
18  
19  
20  
21  
22  
23  
24  
25  
26  
27  
28  
29  
30  
31  
32  
33  
34  
35  
36  
37  
38  
39  
40  
41  
42  
43  
44  
45  
46  
47

|         |    |                                                                                                                                            |     |
|---------|----|--------------------------------------------------------------------------------------------------------------------------------------------|-----|
| Funding | 27 | Describe sources of funding for the systematic review and other support (e.g., supply of data); role of funders for the systematic review. | p15 |
|---------|----|--------------------------------------------------------------------------------------------------------------------------------------------|-----|

From: Moher D, Liberati A, Tetzlaff J, Altman DG, The PRISMA Group (2009). Preferred Reporting Items for Systematic Reviews and Meta-Analyses: The PRISMA Statement. PLoS Med 6(7): e1000097. doi:10.1371/journal.pmed1000097

For more information, visit: [www.prisma-statement.org](http://www.prisma-statement.org).

Page 2 of 2

For peer review only

# BMJ Open

## Work stress and oral conditions: A systematic review of observational studies

|                                 |                                                                                                                                                                                                                                                                                                                                                                                |
|---------------------------------|--------------------------------------------------------------------------------------------------------------------------------------------------------------------------------------------------------------------------------------------------------------------------------------------------------------------------------------------------------------------------------|
| Journal:                        | <i>BMJ Open</i>                                                                                                                                                                                                                                                                                                                                                                |
| Manuscript ID                   | bmjopen-2020-046532.R4                                                                                                                                                                                                                                                                                                                                                         |
| Article Type:                   | Original research                                                                                                                                                                                                                                                                                                                                                              |
| Date Submitted by the Author:   | 27-Apr-2021                                                                                                                                                                                                                                                                                                                                                                    |
| Complete List of Authors:       | Sato, Yukihiro; Asahikawa Medical University, Division of Public Health and Epidemiology, Department of Social Medicine<br>Saijo, Yasuaki; Asahikawa Medical University, Division of Public Health and Epidemiology, Department of Social Medicine<br>Yoshioka, Eiji ; Asahikawa Medical University, Division of Public Health and Epidemiology, Department of Social Medicine |
| <b>Primary Subject Heading</b>: | Occupational and environmental medicine                                                                                                                                                                                                                                                                                                                                        |
| Secondary Subject Heading:      | Dentistry and oral medicine                                                                                                                                                                                                                                                                                                                                                    |
| Keywords:                       | OCCUPATIONAL & INDUSTRIAL MEDICINE, SOCIAL MEDICINE, EPIDEMIOLOGY                                                                                                                                                                                                                                                                                                              |
|                                 |                                                                                                                                                                                                                                                                                                                                                                                |

SCHOLARONE™  
Manuscripts





I, the Submitting Author has the right to grant and does grant on behalf of all authors of the Work (as defined in the below author licence), an exclusive licence and/or a non-exclusive licence for contributions from authors who are: i) UK Crown employees; ii) where BMJ has agreed a CC-BY licence shall apply, and/or iii) in accordance with the terms applicable for US Federal Government officers or employees acting as part of their official duties; on a worldwide, perpetual, irrevocable, royalty-free basis to BMJ Publishing Group Ltd ("BMJ") its licensees and where the relevant Journal is co-owned by BMJ to the co-owners of the Journal, to publish the Work in this journal and any other BMJ products and to exploit all rights, as set out in our [licence](#).

The Submitting Author accepts and understands that any supply made under these terms is made by BMJ to the Submitting Author unless you are acting as an employee on behalf of your employer or a postgraduate student of an affiliated institution which is paying any applicable article publishing charge ("APC") for Open Access articles. Where the Submitting Author wishes to make the Work available on an Open Access basis (and intends to pay the relevant APC), the terms of reuse of such Open Access shall be governed by a Creative Commons licence – details of these licences and which [Creative Commons](#) licence will apply to this Work are set out in our licence referred to above.

Other than as permitted in any relevant BMJ Author's Self Archiving Policies, I confirm this Work has not been accepted for publication elsewhere, is not being considered for publication elsewhere and does not duplicate material already published. I confirm all authors consent to publication of this Work and authorise the granting of this licence.

**Title**

Work stress and oral conditions: A systematic review of observational studies

**Authors**

Yukihiro Sato, DDS, PhD, 1 E-mail: ys@epid.work

Yasuaki Saijo, MD, PhD, 1, E-mail: y-saijo@asahikawa-med.ac.jp

Eiji Yoshioka, MD, PhD, 1, E-mail: e-yoshi@asahikawa-med.ac.jp

1. Division of Public Health and Epidemiology, Department of Social Medicine, Asahikawa Medical University, Japan

**Corresponding Author**

Yukihiro Sato, D.D.S., Ph.D

E-mail: ys@epid.work

Assistant Professor

Division of Public Health and Epidemiology, Department of Social Medicine, Asahikawa Medical University

078-8510, 1-1-1, Midorigaoka higashi2-jo, Asahikawa-shi, Hokkaido, Japan

TEL: +81 166-68-2404

FAX: +81 166-68-2409

1  
2  
3  
4  
5  
6  
7  
8  
9  
10  
11  
12  
13  
14  
15  
16  
17  
18  
19  
20  
21  
22  
23  
24  
25  
26  
27  
28  
29  
30  
31  
32  
33  
34  
35  
36  
37  
38  
39  
40  
41  
42  
43  
44  
45  
46  
47  
48  
49  
50  
51  
52  
53  
54  
55  
56  
57  
58  
59  
60

## 1 **Abstract (300/300)**

2 **Objectives:** Although psychological stress is a risk factor for oral diseases, there seems to be  
3 no review on work stress. This study aimed to review the evidence on the association between  
4 work stress and oral conditions, including dental caries, periodontal status, and tooth loss.

5 **Design:** A systematic review of published observational studies.

6 **Data sources:** A systematic literature search was conducted in PubMed and Scopus  
7 databases on August 12, 2020.

8 **Study selection:** Articles were screened based on the following inclusion criteria: published  
9 after 1966; in English only; epidemiological studies on humans (except case studies, reviews,  
10 letters, commentaries, and editorials); and examined the association of work stress with  
11 dental caries, periodontal status, and tooth loss.

12 **Data extraction:** Data was extracted from eligible studies. A quality assessment was  
13 conducted using the Quality Assessment Tool for Observational Cohort and Cross-Sectional  
14 Studies.

15 **Results:** Of 402 articles identified, 11 met the inclusion criteria, and one study assessed the  
16 association of work stress with dental caries and periodontal status. Of 11 studies, one  
17 reported a nonsignificant association between work stress and dental caries; eight of nine  
18 studies reported a significant association between work stress and worse periodontal status;  
19 and one of two studies reported a significant association between work stress and tooth loss.  
20 Nine of eleven studies were cross-sectional, while the remaining two studies had unclear  
21 methodology. Only two studies were sufficiently adjusted for potential confounders. Eight  
22 studies assessed work stress but did not use the current major measures. Three studies were  
23 rated as fair, while eight studies had poor quality.

24 **Conclusions:** There is a lack of evidence on the association of work stress with dental caries  
25 and tooth loss. Eight studies suggested potential associations between periodontal status and

1  
2  
3  
4  
5  
6 26 work stress. Cohort studies using the major work stress measures and adjusting for the  
7  
8 27 potential confounders are needed.  
9

10 28

11  
12 29 **Keywords**

13  
14 30 systematic review, work stress, job stress, occupational stress, oral health, oral diseases  
15  
16  
17  
18  
19  
20  
21  
22  
23  
24  
25  
26  
27  
28  
29  
30  
31  
32  
33  
34  
35  
36  
37  
38  
39  
40  
41  
42  
43  
44  
45  
46  
47  
48  
49  
50  
51  
52  
53  
54  
55  
56  
57  
58  
59  
60

For peer review only

1  
2  
3  
4  
5  
6 31 **Strengths and limitations of this study**  
7

8 32 ► This is the first systematic review to evaluate and summarise the literature on the  
9  
10 33 association between work stress and oral conditions, including dental caries, periodontal  
11  
12 34 status, and tooth loss.

13  
14 35 ► This systematic review provides a comprehensive insight into the quality of the included  
15  
16 36 papers.

17  
18 37 ► The systematic literature search, screening, and quality assessments were conducted by  
19  
20 38 only one investigator.

21  
22 39 ► A meta-analysis could not be conducted because of the heterogeneity of work stress  
23  
24 40 measures and outcome definitions.  
25  
26  
27  
28  
29  
30  
31  
32  
33  
34  
35  
36  
37  
38  
39  
40  
41  
42  
43  
44  
45  
46  
47  
48  
49  
50  
51  
52  
53  
54  
55  
56  
57  
58  
59  
60

## 41 INTRODUCTION

42 Oral diseases, such as dental caries and periodontal disease, are a major health concern  
43 worldwide. The Global Burden of Disease study has estimated that 2.3 billion individuals  
44 had untreated dental caries, 796 million had severe periodontal disease, and 267 million had  
45 a complete loss of natural teeth in 2017.<sup>1</sup> Dental caries is the destruction of dental hard tissues  
46 in the crowns and roots of the teeth.<sup>2</sup> Periodontal diseases are chronic inflammatory  
47 conditions with disorders of the tissues surrounding and supporting the teeth.<sup>3</sup> Tooth loss is  
48 mainly the consequence of dental caries and periodontal disease.<sup>2,3</sup> Because oral diseases  
49 result in severe toothache and eating, sleeping, and communication disabilities,<sup>4,5</sup> poor oral  
50 conditions can restrict work performance<sup>4,5</sup> and create a significant economic burden.<sup>6</sup> Indeed,  
51 work productivity loss due to oral conditions is estimated at 187.61 billion US dollars  
52 annually.<sup>6</sup> The necessity of preventing oral diseases for working adults is highlighted.

53 Since the 1990s, rapid changes in the global economy and the diverse markets have  
54 occurred, and psychological workplace stress has become more prevalent and severe,  
55 especially among industrialised countries.<sup>7</sup> Indeed, Kivimäki et al. reported a 15% prevalence  
56 of job strain measured using job-content and demand-control questionnaires from 13  
57 European cohorts' data (1985–2006).<sup>8</sup> Besides, work stress can have profound effects on  
58 health. There is accumulating evidence of the risk of work stress on cancer, cardiovascular  
59 diseases, diabetes, and depression.<sup>9,10</sup> Béjean and Sultan-Taïeb estimated that the work-  
60 related stress costs due to illnesses could range between €1,167 million and €1,975 million  
61 in France in 2000.<sup>11</sup> Work stress affects workers' health and productivity.

62 Psychological stress is recognised as a risk factor for dental caries and periodontal  
63 diseases. Psychological stress is related to oral diseases through immune system dysfunction,  
64 increased stress hormones, cariogenic bacterial counts, and poor oral health behaviours.<sup>12,13</sup>  
65 Work stress is strongly linked with psychological and physical health.<sup>9,10</sup> Previous systematic

1  
2  
3  
4  
5  
6 66 reviews suggested potential associations of psychological stress with dental caries and  
7  
8 67 periodontitis.<sup>14,15</sup> However, there seems to be no review on the association between work  
9  
10 68 stress and oral diseases. Today, work stress has become an increasingly serious problem.  
11  
12 69 Besides, the number of women in the workforce and dual-earner families have been  
13  
14 70 increasing.<sup>16</sup> A wide range of populations can suffer the risk of oral diseases from exposure  
15  
16 71 to work stress. Thus, the aim of this systematic review was to evaluate and summarise the  
17  
18 72 literature on the association between work stress and oral conditions, including dental caries,  
19  
20 73 periodontal status, and tooth loss. We set the following review question: Is work stress  
21  
22 74 associated with dental caries, periodontal status, and tooth loss among working adults?  
23  
24  
25

## 26 76 **METHODS**

27  
28 77 The reporting of this systematic review conforms to the Preferred Reporting Items for  
29  
30 78 Systematic Reviews and Meta-Analyses (PRISMA) guidelines.<sup>17,18</sup> We also followed the  
31  
32 79 Conducting Systematic Reviews and Meta-Analyses of Observational Studies of Etiology  
33  
34 80 (COSMOS-E) guidance<sup>19</sup> and the reporting of Meta-analysis Of Observational Studies in  
35  
36 81 Epidemiology (MOOSE).<sup>20</sup> The protocol of this systematic review was not registered.

### 38 82 **Eligibility criteria**

39  
40 83 Published studies were eligible if they: 1) were published in English; 2) were epidemiological  
41  
42 84 studies on humans (except case studies, reviews, letters, commentaries, and editorials); and  
43  
44 85 3) examined the association of work stress with dental caries, periodontal status, and tooth  
45  
46 86 loss.

### 48 87 **Information sources and searches**

49  
50 88 On August 12, 2020, we identified potentially relevant published studies in PubMed (1966  
51  
52 89 to August 12, 2020) and Scopus (1966 to August 12, 2020) databases. As PubMed and  
53  
54 90 Scopus have only data back to 1966, we focused on articles published after 1966. We used  
55  
56  
57

1  
2  
3  
4  
5  
6 91 the following script to obtain a wide range of literature: ("job strain" OR "effort reward")  
7  
8 92 AND (dental OR oral); ("job stress" OR "work stress" OR "occupational stress") AND  
9  
10 93 (dental OR oral). The details of the search strategies for each database are shown in  
11  
12 94 Supplemental Table 1. Besides, we manually hand-searched for potentially suitable studies  
13  
14 95 through the reference lists of identified articles and Google scholar. After excluding duplicate  
15  
16 96 articles, one author (YuS) assessed the titles and abstracts according to the aforementioned  
17  
18 97 criteria. Then, eligible studies were selected for the full-text review.

#### 98 **Data extraction**

99 One author (YuS) extracted the following information from each eligible study: 1) name of  
100 the first author; 2) study design; 3) study location (country); 4) number of participants and  
101 work-related characteristics; 5) exposure and its measurements; 6) outcome and its  
102 measurements; 7) age range and proportion of women; 8) covariates included in the adjusted  
103 models; and 9) the main results. The results were shown in Table 1.

#### 104 **Quality assessment**

105 We used the Quality Assessment Tool for Observational Cohort and Cross-Sectional Studies  
106 to assess the quality of included studies.<sup>21</sup> This tool includes 14 questions for evaluating the  
107 internal validity of a study and these questions are documented in the footnote of Table 2.  
108 For each question, one author (YuS) rated them as yes, no, or other (including cannot  
109 determine, not reported, and not applicable). The overall quality rating for the study was  
110 regarded as good if all the domains were assessed favourably.

#### 111 **Synthesis of results**

112 A meta-analysis could not be conducted because of the heterogeneity of work stress measures  
113 and outcome definitions.

#### 114 **Patient and public involvement**

115 No patient involved.



116

## 117 **RESULTS**

118 Figure 1 presents the flow diagram of information through the phases of the systematic  
119 review. Of the 402 articles identified in PubMed and Scopus databases, 129 duplicated  
120 articles were removed, the titles and abstracts of 273 were screened, and 11 met the eligibility  
121 criteria. Three more articles identified through reference lists and hand-search were added.  
122 One article was identified by a hand-search using Google Scholar,<sup>22</sup> one was from a reference  
123 list,<sup>23</sup> and the third was an article<sup>24</sup> plagiarised by a retraction paper. Because the article<sup>24</sup>  
124 which was plagiarised by the retracted one was published officially and has not been retracted,  
125 it was included in our references. After full-text assessments of 14 articles, three were  
126 excluded due to retraction (n=1) and the use of composite outcomes including dental caries  
127 and periodontal status (n=2).<sup>25,26</sup> Finally, 11 articles were included in this systematic  
128 review.<sup>22-24,27-34</sup>

### 129 **Study characteristics of individual studies**

130 Table 1 shows the 12 summaries from the 11 studies. One of eleven studies reported on dental  
131 caries and periodontal status,<sup>27</sup> eight reported on periodontal status,<sup>22-24,28-32</sup> and two reported  
132 on tooth loss.<sup>33,34</sup> Three studies were conducted in Japan,<sup>30,32-34</sup> two in India,<sup>24,31</sup> and one  
133 each in the UK,<sup>28</sup> the US,<sup>29</sup> Brazil,<sup>27</sup> and Iraq.<sup>22</sup> One study did not report on the study  
134 location.<sup>28</sup> The sample size varied from 18 to 1,426 among included studies. In one study,  
135 working status was not reported.<sup>29</sup> One study included employed and unemployed  
136 participants.<sup>30</sup> Two studies did not include women,<sup>27,33</sup> and three did not report on sex.<sup>22,24,31</sup>

137 Three studies assessed work stress using the current major measures (Job Demand-  
138 Control Model and Effort-Reward Imbalance Model).<sup>27,33,34</sup> Work stress was assessed using  
139 the Karasek job strain model,<sup>27,33</sup> the Effort-Reward Imbalance model,<sup>34</sup> the Brief Job Stress  
140 Questionnaire developed by referring to the demand-control-support model in Japan,<sup>32</sup> a self-

1  
2  
3  
4  
5  
6 141 reported job stress,<sup>24</sup> the Occupational Stress Indicator,<sup>23,28</sup> an occupational stress index by  
7  
8 142 Srivastava and Singh,<sup>31</sup> the Life events scale,<sup>22,30</sup> and the Problems of Everyday Living Scale  
9  
10 143 by Pearlin and Schooler.<sup>29</sup>  
11

12 144 Three studies presented only descriptive statistics.<sup>22,29,31</sup> Eight studies performed  
13  
14 145 regression analyses;<sup>23,24,27,28,30,32–34</sup> but two of the eight studies did not report the types of a  
15  
16 146 regression modeling used.<sup>23,28</sup> Only two studies sufficiently adjusted for potential  
17  
18 147 confounders such as socioeconomic status and work-related variables.<sup>27,34</sup>  
19

### 20 148 **Dental caries and work stress**

21  
22 149 One study reported the cross-sectional association between work stress and dental caries,  
23  
24 150 which included 164 paid male workers aged 35 to 44 years in Brazil.<sup>27</sup> Work stress was  
25  
26 151 assessed according to the Karasek job strain model.<sup>35</sup> Dental caries status was assessed using  
27  
28 152 the DMFS index (the number of decayed [D], missing [M], and filled [F] teeth surfaces per  
29  
30 153 person). After adjusting for covariates, one-point increases in the work mental demand, work  
31  
32 154 control, and work variety scores were associated with 0.19 (95% confidence interval [CI] =  
33  
34 155 -0.91, 1.29), 0.87 (95% CI = -0.18, 1.91), and -0.06 (95% CI = -1.57, 1.45) increases in the  
35  
36 156 DMFS index, respectively, in a multivariable regression analysis. Consequently, this study  
37  
38 157 reported a nonsignificant association between work stress and dental caries.<sup>27</sup>  
39

### 40 158 **Periodontal status and work stress**

41  
42 159 Eight of nine studies reported a significant association between work stress and worse  
43  
44 160 periodontal status.<sup>22–24,27–32</sup> The measurements of periodontal status varied across the  
45  
46 161 included studies. The measurements included probing pocket depth,<sup>22,23,31</sup> clinical attachment  
47  
48 162 level,<sup>22,28,29</sup> alveolar bone loss,<sup>29</sup> gingival index,<sup>22</sup> bleeding on probing,<sup>22</sup> the Community  
49  
50 163 Periodontal Index and Treatment Needs protocol,<sup>24</sup> and a composite outcome, including these  
51  
52 164 measures.<sup>27,32</sup> Eight studies assessed periodontal status based on oral examination with probe,  
53  
54 165 but one study was based on only visual inspection by dentists.<sup>32</sup>  
55  
56  
57  
58  
59  
60

1  
2  
3  
4  
5  
6 166 Among the nine studies, two studies had unclear methodology; therefore, they were  
7  
8 167 categorised as unknown.<sup>23,28</sup> Freeman and Goss assessed work stress and periodontal status  
9  
10 168 over a 12-month period.<sup>23</sup> However, they did not clearly report when work stress and  
11  
12 169 periodontal status variables were assessed and how they were used in the statistical models.  
13  
14 170 Linden et al. followed-up patients for 5.5 years, but work stress was only assessed at the  
15  
16 171 follow-up examination, not at the baseline survey.<sup>28</sup>

17 172 Among the remaining seven studies, after excluding the above two studies, three  
18  
19 173 studies presented only descriptive statistics.<sup>22,29,31</sup> The remaining four papers reported  
20  
21 174 significant associations following regression analyses.<sup>24,27,30,32</sup> However, Akhter et al. used  
22  
23 175 general stress questions not specific to work stress and included nonworking adults.<sup>30</sup> Islam  
24  
25 176 et al. used the Brief Job Stress Questionnaire derived from the demand-control-support model  
26  
27 177 in Japan, and periodontal status was assessed based on the visual inspection by dentists.<sup>32</sup>  
28  
29 178 Important potential confounders such as socioeconomic status and work-related variables,  
30  
31 179 were not included. Ramji assessed work stress using a single job stress question and did not  
32  
33 180 adjust for covariates in the statistical models.<sup>24</sup> Marcenes and Sheiham reported a significant  
34  
35 181 association between periodontal status and work stress.<sup>27</sup> Periodontal status was assessed by  
36  
37 182 the presence or absence of gums bleeding on probing or with pockets. The authors divided  
38  
39 183 periodontal measures into groups based on “complete absence of teeth with gums bleeding  
40  
41 184 on probing and with pockets,” or “the presence of any tooth with gums bleeding on probing  
42  
43 185 or pockets,” and defined the latter as those with periodontal disease. After adjusting for  
44  
45 186 covariates, one-point increases in work mental demand scores, work control scores, and work  
46  
47 187 variety scores were associated with ORs of 1.22 (95%CI = 1.06, 1.37), 0.97 (95%CI = 0.88,  
48  
49 188 1.07), and 0.99 (95%CI = 0.85, 1.16), respectively, for having periodontal disease, in a  
50  
51 189 logistic regression model.

#### 52 53 54 190 **Tooth loss and work stress**

1  
2  
3  
4  
5  
6 191 Two studies on the association between work stress and tooth loss were identified. One of  
7  
8 192 the two reported a significant association between work stress and tooth loss.<sup>33,34</sup> Hayashi et  
9  
10 193 al. reported the association between work stress, assessed using the Karasek job strain model,  
11  
12 194 and tooth loss.<sup>33</sup> A total of 322 male workers employed at a manufacturing company were  
13  
14 195 included. They dichotomised the number of tooth loss into  $\leq 3$  and  $\geq 4$ . After adjusting for  
15  
16 196 covariates, high job demand and low control conditions were associated with high odds of  
17  
18 197 having  $\geq 4$  teeth loss but not significant (OR = 1.2 [95% CI = 0.40, 3.42]). This study did not  
19  
20 198 adjust for the important potential confounders such as socioeconomic status and work-related  
21  
22 199 variables. Sato et al. reported the association between work stress, assessed using the effort–  
23  
24 200 reward imbalance model, and self-reported tooth loss.<sup>34</sup> After adjusting for covariates  
25  
26 201 including socioeconomic status and work-related variables, a high effort-reward imbalance  
27  
28 202 ratio was significantly associated with a high prevalence of  $\geq 1$  tooth loss (prevalence ratio =  
29  
30 203 1.20 [95% CI = 1.01, 1.42]).

### 32 204 **Study quality**

34 205 Table 2 presents the results of the quality assessments for each study. Eight studies (73%)  
35  
36 206 had poor quality, while three (27%) were rated as fair. None of the studies addressed question  
37  
38 207 6 (“For the analyses in this paper, were the exposure(s) of interest measured prior to the  
39  
40 208 outcome(s) being measured?”); 7 (“Was the timeframe sufficient so that one could  
41  
42 209 reasonably expect to see an association between exposure and outcome if it existed?”); and  
43  
44 210 10 (“Was the exposure(s) assessed more than once over time?”); because all the studies were  
45  
46 211 cross-sectional or the study design was unclear.

48 212

### 50 213 **DISCUSSION**

52 214 This is the first systematic review to evaluate and summarise the existing literature on the  
53  
54 215 associations between work stress and oral conditions. As our findings showed, only one study

1  
2  
3  
4  
5  
6 216 reported on dental caries and periodontal status, nine on periodontal status, and two on tooth  
7  
8 217 loss. Based on the findings of this review, the evidence is lacking on the association of work  
9  
10 218 stress with dental caries and tooth loss. Eight of nine studies reported the significant  
11  
12 219 associations between multiple periodontal measures and work stress.

### 14 220 **Limitations of the review**

16 221 This systematic review has four limitations. First, the systematic literature search, screening,  
17  
18 222 and quality assessments were conducted by only one investigator. A single screening could  
19  
20 223 miss more studies than a double screening.<sup>36</sup> Second, only English language literature was  
21  
22 224 included. Although a systematic review found no bias due to English-language restriction in  
23  
24 225 systematic reviews,<sup>37</sup> this review might include bias. Third, there was no protocol for this  
25  
26 226 systematic review. A priori systematic review protocol registration provides the rigor and  
27  
28 227 trustworthiness of the reviews.<sup>38</sup> This might weaken the rigor and trustworthiness of our  
29  
30 228 review. Finally, a meta-analysis could not be conducted owing to the heterogeneity of the  
31  
32 229 included studies. Work stress was assessed using varied measures. Particularly, only a few  
33  
34 230 studies used the current major measures of work stress. Indicators of periodontal status were  
35  
36 231 also varied. No study used valid epidemiological definitions for periodontal disease as the  
37  
38 232 outcome. The cut-off points differed between the two studies on tooth loss and work stress.  
39  
40 233 Besides, there was only one study on dental caries and work stress. These limitations  
41  
42 234 hindered us from performing a meta-analysis.

### 44 235 **Dental caries and work stress**

46 236 We found only one study on the cross-sectional association between work stress and dental  
47  
48 237 caries.<sup>27</sup> The conclusion was that there was no significant association between work stress  
49  
50 238 and dental caries. However, since the sample size was relatively small (n=164), there is the  
51  
52 239 possibility of a false negative association. Besides, each subscale of the Karasek job strain  
53  
54 240 model was simultaneously included in the statistical model. Generally, in the Karasek job

1  
2  
3  
4  
5  
6 241 strain model, the recommendation is to use four categories of job strain generated by the  
7  
8 242 interaction of the subscales: High-strain jobs, active jobs, low-strain jobs, and passive jobs.<sup>9</sup>  
9  
10 243 Due to the above treatments of the subscales, it is possible that the association was  
11  
12 244 underestimated. Additionally, as there was no cohort study, we could not assess the  
13  
14 245 prospective associations. Considering the above limitations, it was difficult to determine  
15  
16 246 whether work stress is associated with dental caries. A further study should include a cohort  
17  
18 247 design and a relatively large sample size with appropriate work stress measures.

#### 20 248 **Periodontal status and work stress**

21  
22 249 Nine studies reported on the association between work stress and periodontal status.<sup>22–24,27–</sup>  
23  
24 250 <sup>32</sup> However, the outcome measures were varied across the included studies. Although there  
25  
26 251 are the accepted epidemiological definitions of periodontitis according to the European  
27  
28 252 Workshop in Periodontology and the Centers for Disease Control/American Academy of  
29  
30 253 Periodontology,<sup>39,40</sup> there was no study that used the definitions. It means that the included  
31  
32 254 studies reported the associations between work stress and periodontal measures, not  
33  
34 255 periodontal disease. In addition, the measurement of work stress was measured also varied  
35  
36 256 across studies. Each measure assessed different dimensions of work stress.<sup>41</sup> Due to the  
37  
38 257 heterogeneity of exposures and outcomes, we could not conduct a meta-analysis.

39  
40 258 Of the nine studies, only one study adjusted for the potential confounders, such as  
41  
42 259 socioeconomic status and work-related variables.<sup>27</sup> Besides, no cohort study was found. The  
43  
44 260 failure to adjust for the confounders and consider the induction time weakens the research  
45  
46 261 evidence. However, despite the above limitations, the consistent association between work  
47  
48 262 stress and worse periodontal status is noteworthy. To verify the current results, a further  
49  
50 263 cohort study using the validated definitions of periodontal disease and current measurements  
51  
52 264 of work stress, in addition to adjusting for the potential confounders should be performed.

#### 54 265 **Tooth loss and work stress**

1  
2  
3  
4  
5  
6 266 Two studies on the association between work stress and tooth loss were identified. Hayashi's  
7  
8 267 study included only male workers employed at one manufacturing company.<sup>33</sup> In contrast,  
9  
10 268 Sato's study included active workers sampled from a general population.<sup>34</sup> However, the  
11  
12 269 response rate was relatively low (32%). The generalisability of both studies could be limited.

13  
14 270 The two studies had different cut-off points of tooth loss. Hayashi's study used the  
15  
16 271 cut-off point of more than 4 teeth lost. The cutoff point is higher than the mean number of  
17  
18 272 teeth loss (at 25 to 34, 35 to 45, 46 to 54, and 55 to 64 years = 0.16, 0.58, 1.48, and 4.00,  
19  
20 273 respectively) reported by the national statistical surveys.<sup>42</sup> This study targeted severe cases  
21  
22 274 only. In Sato's study, the outcome was the loss of at least more than one tooth. However, this  
23  
24 275 outcome relied on self-reported answers; therefore, self-reported bias might exist.

25  
26 276 Both studies showed an increased risk of tooth loss, although only one of the two  
27  
28 277 studies reported a significant association between work stress and tooth loss. However, due  
29  
30 278 to the above limitations, it is difficult to derive any form of conclusion. In the future, a cohort  
31  
32 279 study including general workers should be conducted to confirm these findings.

### 33 34 280 **Conclusions**

35  
36 281 Based on the findings, this systematic review suggests a lack of evidence on the association  
37  
38 282 of work stress with dental caries and tooth loss. Although eight of the nine studies reported  
39  
40 283 significant associations between multiple periodontal measures and work stress, no study  
41  
42 284 used valid epidemiological definitions of periodontal disease. For future research, well-  
43  
44 285 designed cohort studies including potential confounding factors and the use of generally  
45  
46 286 accepted measurements of work stress and periodontal disease are needed.

**Ethical Approval Statement**

Not applicable

**Contributors**

YuS contributed to the acquisition and the interpretation of data and drafting of the work. YaS and EY revised it critically for important intellectual content. All authors contributed to the conception and design of the work, approved the final version to be published, and agreed to be accountable for all aspects of the work in ensuring that questions related to the accuracy or integrity of any part of the work are appropriately investigated and resolved.

**Funding**

This study was supported by Grant-in-Aid for Early-Career Scientists from the Japan Society for the Promotion of Science KAKENHI (grant number JP19K19306).

**Competing interests**

The authors declare no potential conflicts of interest with respect to the research, authorship, and publication of this article.

**Patient consent for publication**

Not required.

**Provenance and peer review**

Not commissioned; externally peer-reviewed.

**Data availability statement**

Not applicable.



## References

1. Bernabe E, Marcenes W, Hernandez CR, et al. Global, Regional, and National Levels and Trends in Burden of Oral Conditions from 1990 to 2017: A Systematic Analysis for the Global Burden of Disease 2017 Study. *J Dent Res* 2020; 99: 362–373.
2. Pitts NB, Zero DT, Marsh PD, et al. Dental caries. *Nat Rev Dis Primer* 2017; 3: 17030.
3. Kinane DF, Stathopoulou PG, Papapanou PN. Periodontal diseases. *Nat Rev Dis Primer* 2017; 3: 17038.
4. Sheiham A, Croog SH. The psychosocial impact of dental diseases on individuals and communities. *J Behav Med* 1981; 4: 257–272.
5. Reisine ST. The Impact of Dental Conditions on Social Functioning and the Quality of Life. *Annu Rev Public Health* 1988; 9: 1–19.
6. Righolt AJ, Jevdjevic M, Marcenes W, et al. Global-, Regional-, and Country-Level Economic Impacts of Dental Diseases in 2015. *J Dent Res* 2018; 97: 501–507.
7. Lundberg U, Cooper C. The New Workplace in a Rapidly Changing World. In: *The science of occupational health: Stress, psychobiology, and the new world of work*. Chichester: Wiley-Blackwell, pp. 11–21.
8. Kivimäki M, Nyberg ST, Batty GD, et al. Job strain as a risk factor for coronary heart disease: a collaborative meta-analysis of individual participant data. *The Lancet* 2012; 380: 1491–1497.
9. Berkman L, Kawachi I, Theorell T. Working Conditions and Health. In: *Social epidemiology*. New York: Oxford University Press, 2014, pp. 153–181.
10. Lundberg U, Cooper C. Stress-Related Health Problems. In: *The science of occupational health: Stress, psychobiology, and the new world of work*. Chichester: Wiley-Blackwell, pp. 75–91.
11. Béjean S, Sultan-Taïeb H. Modeling the economic burden of diseases imputable to stress at work. *Eur J Health Econ* 2005; 6: 16–23.
12. Sabbah W, Gomaa N, Gireesh A. Stress, allostatic load, and periodontal diseases. *Periodontol 2000* 2018; 78: 154–161.
13. Gomaa N, Glogauer M, Tenenbaum H, et al. Social-Biological Interactions in Oral Disease: A ‘Cells to Society’ View. *PLOS ONE* 2016; 11: e0146218.
14. Tikhonova S, Booiij L, D’Souza V, et al. Investigating the association between stress, saliva and dental caries: a scoping review. *BMC Oral Health* 2018; 18: 41.

15. Castro MML, Ferreira R de O, Fagundes NCF, et al. Association between Psychological Stress and Periodontitis: A Systematic Review. *Eur J Dent* 2020; 14: 171–179.
16. Lundberg U, Cooper C. Introduction: History of Work and Health. In: *The science of occupational health: Stress, psychobiology, and the new world of work*. Chichester: Wiley-Blackwell, pp. 1–10.
17. Moher D, Liberati A, Tetzlaff J, et al. Preferred reporting items for systematic reviews and meta-analyses: the PRISMA statement. *BMJ* 2009; 339: b2535.
18. Liberati A, Altman DG, Tetzlaff J, et al. The PRISMA statement for reporting systematic reviews and meta-analyses of studies that evaluate healthcare interventions: explanation and elaboration. *BMJ* 2009; 339: b2700.
19. Dekkers OM, Vandenbroucke JP, Cevallos M, et al. COSMOS-E: Guidance on conducting systematic reviews and meta-analyses of observational studies of etiology. *PLoS Med* 2019; 16: e1002742–e1002742.
20. Stroup DF, Berlin JA, Morton SC, et al. Meta-analysis of Observational Studies in Epidemiology: A Proposal for Reporting. *JAMA* 2000; 283: 2008–2012.
21. National Institutes of Health. Quality Assessment Tool for Observational Cohort and Cross-Sectional Studies, <https://www.nhlbi.nih.gov/health-topics/study-quality-assessment-tools> (2014, accessed 17 September 2020).
22. Talib Bandar K. The association between periodontal disease and job stress in Baghdad city. *J Kerbala Univ* 2009; 5: 47–57.
23. Freeman R, Goss S. Stress measures as predictors of periodontal disease – a preliminary communication. *Community Dent Oral Epidemiol* 1993; 21: 176–177.
24. Ramji R. *Assessing the relationship between occupational stress and periodontitis in industrial workers*. PhD Thesis, Umeå International School of Public Health, 2011.
25. Yoshiono K, Suzuki S, Ishizuka Y, et al. Relationship between job stress and subjective oral health symptoms in male financial workers in Japan. *Ind Health* 2017; 55: 119–126.
26. Capurro DA, Davidsen M. Socioeconomic inequalities in dental health among middle-aged adults and the role of behavioral and psychosocial factors: evidence from the Spanish National Health Survey. *Int J Equity Health* 2017; 16: 34.
27. Segura Marcenes W, Sheiham A. The relationship between work stress and oral health status. *Soc Sci Med* 1992; 35: 1511–1520.

- 1
- 2
- 3
- 4
- 5
- 6 28. Linden GJ, Mullally BH, Freeman R. Stress and the progression of periodontal  
7 disease. *J Clin Periodontol* 1996; 23: 675–680.
- 8 29. Genco RJ, Ho AW, Grossi SG, et al. Relationship of Stress, Distress, and  
9 Inadequate Coping Behaviors to Periodontal Disease. *J Periodontol* 1999; 70: 711–723.
- 10 30. Akhter R, Hannan MA, Okhubo R, et al. Relationship between stress factor and  
11 periodontal disease in a rural area population in Japan. *Eur J Med Res* 2005; 10: 352–357.
- 12 31. Mahendra L, Mahendra J, Austin RD, et al. Stress as an aggravating factor for  
13 periodontal diseases. *J Clin Diagn Res* 2011; 5: 889–93.
- 14 32. Islam MM, Ekuni D, Yoneda T, et al. Influence of Occupational Stress and Coping  
15 Style on Periodontitis among Japanese Workers: A Cross-Sectional Study. *Int J Environ*  
16 *Res Public Health* 2019; 16: 3540.
- 17 33. Hayashi N, Tamagawa H, Tanaka M, et al. Association of Tooth Loss with  
18 Psychosocial Factors in Male Japanese Employees. *J Occup Health* 2001; 43: 351–355.
- 19 34. Sato Y, Tsuboya T, Aida J, et al. Effort-reward imbalance at work and tooth loss: a  
20 cross-sectional study from the J-SHINE project. *Ind Health* 2020; 58: 26–34.
- 21 35. Karasek RA. Job Demands, Job Decision Latitude, and Mental Strain: Implications  
22 for Job Redesign. *Adm Sci Q* 1979; 24: 285–308.
- 23 36. Waffenschmidt S, Knelangen M, Sieben W, et al. Single screening versus  
24 conventional double screening for study selection in systematic reviews: a methodological  
25 systematic review. *BMC Med Res Methodol* 2019; 19: 132.
- 26 37. Morrison A, Polisena J, Husereau D, et al. The effect of English-language  
27 restriction on systematic review-based meta-analyses: a systematic review of empirical  
28 studies. *Int J Technol Assess Health Care* 2012; 28: 138–144.
- 29 38. Shamseer L, Moher D, Clarke M, et al. Preferred reporting items for systematic  
30 review and meta-analysis protocols (PRISMA-P) 2015: elaboration and explanation. *BMJ*;  
31 349. Epub ahead of print 2015. DOI: 10.1136/bmj.g7647.
- 32 39. Page RC, Eke PI. Case Definitions for Use in Population-Based Surveillance of  
33 Periodontitis. *J Periodontol* 2007; 78: 1387–1399.
- 34 40. Tonetti MS, Claffey N, on behalf of the European Workshop in Periodontology  
35 group C. Advances in the progression of periodontitis and proposal of definitions of a  
36 periodontitis case and disease progression for use in risk factor research. *J Clin Periodontol*  
37 2005; 32: 210–213.
- 38 41. Leka S, Jain A, World Health Organization. Health impact of psychosocial hazards  
39  
40  
41  
42  
43  
44  
45  
46  
47  
48  
49  
50  
51  
52  
53  
54  
55  
56  
57  
58  
59  
60

1  
2  
3  
4  
5  
6 at work: an overview, <https://apps.who.int/iris/handle/10665/44428> (2010).

7 42. Ministry of Health, Labour and Welfare (Japan). *Dental Diseases Survey*,  
8 <https://www.mhlw.go.jp/toukei/list/62-17b.html> (2016, accessed 12 March 2021).  
9  
10  
11  
12  
13  
14  
15  
16  
17  
18  
19  
20  
21  
22  
23  
24  
25  
26  
27  
28  
29  
30  
31  
32  
33  
34  
35  
36  
37  
38  
39  
40  
41  
42  
43  
44  
45  
46  
47  
48  
49  
50  
51  
52  
53  
54  
55  
56  
57  
58  
59  
60

For peer review only

## Tables

Table 1. Summary of included studies on work stress and oral conditions

| Author's name (year of publication)       | Study design    | Study location | Exposure (work stress)                                           | Outcome                                                                                                                                                                                                                                                                         | Number of participants                                                                                                               | Mean age of the participants and proportion of women | Covariates                                                                                                                                                       | Main results                                                                                                                                                                                                                                                                                                                                                                                                                                                |
|-------------------------------------------|-----------------|----------------|------------------------------------------------------------------|---------------------------------------------------------------------------------------------------------------------------------------------------------------------------------------------------------------------------------------------------------------------------------|--------------------------------------------------------------------------------------------------------------------------------------|------------------------------------------------------|------------------------------------------------------------------------------------------------------------------------------------------------------------------|-------------------------------------------------------------------------------------------------------------------------------------------------------------------------------------------------------------------------------------------------------------------------------------------------------------------------------------------------------------------------------------------------------------------------------------------------------------|
| <b>Dental caries</b>                      |                 |                |                                                                  |                                                                                                                                                                                                                                                                                 |                                                                                                                                      |                                                      |                                                                                                                                                                  |                                                                                                                                                                                                                                                                                                                                                                                                                                                             |
| Marcenes and Sheiham (1992) <sup>27</sup> | Cross-sectional | Brazil         | Karasek job strain model                                         | DMFS index (number of decayed (D), missing (M), and Filled (F) teeth surfaces per persons)                                                                                                                                                                                      | 164 male paid workers aged from 35 to 44 years                                                                                       | Mean age = 41.2 (standard deviation = 2.2)<br>0%     | Marital quality, toothbrushing frequency, sugar consumption, age, years of residence, type of toothpaste, frequency dental attendance, and socio-economic status | Work mental demand: Coefficients = 0.19 (95% CI = -0.91, 1.29)<br>Work control: Coefficients = 0.87 (95% CI = -0.18, 1.91)<br>Work variety: Coefficients = -0.06 (95% CI = -1.57, 1.45)<br>From a linear regression analysis                                                                                                                                                                                                                                |
| <b>Periodontal status</b>                 |                 |                |                                                                  |                                                                                                                                                                                                                                                                                 |                                                                                                                                      |                                                      |                                                                                                                                                                  |                                                                                                                                                                                                                                                                                                                                                                                                                                                             |
| Marcenes and Sheiham (1992) <sup>27</sup> | Cross-sectional | Brazil         | Karasek job strain model                                         | The presence or absence of teeth either with gums bleeding on probing or with pockets was used. The indicator was labelled as 'complete absence of teeth with gums bleeding on probing and with pockets', and 'presence of any tooth with gums bleeding on probing or pockets'. | 164 male paid workers aged from 35 to 44 years (16 workers were excluded from 164 participants due to missing values and edentulous) | Mean age = 41.2 (standard deviation = 2.2)<br>0%     | Marital quality, toothbrushing frequency, sugar consumption, age, years of residence, type of toothpaste, frequency dental attendance, and socio-economic status | Work mental demand: Odds ratio = 1.22 (95% confidence interval = 1.06, 1.37)<br>Work control: Odds ratio = 0.97 (95% confidence interval = 0.88, 1.07)<br>Work variety: Odds ratio = 0.99 (95% confidence interval = 0.85, 1.16)<br>From a logistic regression analysis<br>Type A behaviour: Coefficients = 0.41 (p-value=0.003)<br>Work environment (organisation/climate): Coefficients = -0.34 (p-value = 0.007)<br>(statistical model was not reported) |
| Freeman and Goss (1993) <sup>23</sup>     | Unknown         | Not reported   | Occupational Stress Indicator                                    | Mean increases in pocket depth                                                                                                                                                                                                                                                  | 10 women and 8 men from the head office of a large company                                                                           | Mean age = 39<br>55.6%                               | Unknown                                                                                                                                                          | Job satisfaction: Coefficients = -0.014 (p-value < 0.01)<br>Type A: Coefficients = 0.026 (p-value < 0.05)                                                                                                                                                                                                                                                                                                                                                   |
| Linden et al. (1996) <sup>28</sup>        | Unknown         | UK             | Occupational Stress Indicator assessed at the second examination | Changes in clinical attachment level after an interval of 5.5 (SD 0.6) years.                                                                                                                                                                                                   | 23 employed regular dental attendees aged between 20 and 50 years who had moderate or                                                | Mean age = 41.1 (standard deviation = 7.3)<br>43.5%  | Age and social class of the household                                                                                                                            |                                                                                                                                                                                                                                                                                                                                                                                                                                                             |

established periodontitis  
(13 men and 10 women)

Locus of control: Coefficients =  
-0.035 (p-value  $\geq$  0.05)  
(statistical model was not  
reported)

Job strain score among  
Attachment Loss categories  
(mean  $\pm$  standard error)  
Healthy: 2.12  $\pm$  0.05  
Low: 2.09  $\pm$  0.02  
Moderate: 2.16  $\pm$  0.02  
High: 2.09  $\pm$  0.05  
Severe: 2.22  $\pm$  0.05  
(nonsignificant)

From analysis of covariance

Job strain score among Alveolar  
Bone Loss categories (mean  $\pm$   
standard error)

Healthy: 2.12  $\pm$  0.02  
Low: 2.10  $\pm$  0.03  
Moderate: 2.09  $\pm$  0.04  
Severe: 2.19  $\pm$  0.04  
(nonsignificant)

From analysis of covariance

1,426 inhabitants aged  
25 to 74 years (741  
women and 685 men)  
\*working status was  
unknown

Mean age = 48.9  
(standard deviation  
= 13.9)  
52.0%

Age, gender, and levels of  
smoking.

Severity of Attachment Loss  
Healthy (0 to 1 mm clinical  
attachment level), low (1.1 to 2.0  
mm), moderate (2.1 to 3.0 mm),  
high (3.1 to 4.0 mm) and severe  
(4.1 to 8.0 mm)  
Severity of Alveolar Bone Loss  
Healthy (0.4 to 1.9 mm alveolar  
crestal height), low (2.0 to 2.9  
mm), moderate (3.0 to 3.9 mm),  
and severe ( $\geq$ 4.0 mm)

Problems of  
Everyday Living  
Scale of Pearlin and  
Schooler

1,089 employed and  
unemployed residents  
ranging in age from 18  
to 96 years of a farming  
village in the  
northernmost island of  
Japan (531 men and 558  
women)

Mean age = 55.0  
(standard deviation  
= 1.7)  
51.2%

Age, gender, employment  
status, smoking behaviour,  
stress within 1 month, self-  
health-related stress, family  
health-related stress,  
frequency of dental  
attendance, hyperlipidaemia,  
and diabetes mellitus

Mean clinical attachment loss  
<1.5 mm were assigned to a non-  
diseased group and those with  
mean clinical attachment loss  $\geq$ 1.5  
mm were assigned to a diseased  
group

Life events scale  
(yes or no)

Job stress (reference: No): Odds  
ratio = 1.71 (95% confidence  
interval = 1.10, 2.67) from a  
logistic regression analysis

The mean gingival index  
yes = 1.851 and no = 1.586 (p-  
value > 0.05)

64 working dental  
patients of both genders  
with ages ranging from  
23 to 65 years

Mean age and sex  
were not reported.

None

Gingival Index, probing pocket  
depth, bleeding on probing, and  
clinical attachment level

Life events scale  
(yes or no)

Total mean percentage of sites  
with probing pocket depth  $\geq$  4  
mm  
yes = 6.277% and no = 4.762%  
(p-values <0.05)

1  
2  
3  
4  
5  
6  
7  
8  
9  
10  
11  
12  
13  
14  
15  
16  
17  
18  
19  
20  
21  
22  
23  
24  
25  
26  
27  
28  
29  
30  
31  
32  
33  
34  
35  
36  
37  
38  
39  
40  
41  
42  
43  
44  
45  
46  
47

Total mean Bleeding On Probing  
yes = 41.534% and no = 32.137% (p-value > 0.05)

The mean of the clinical attachment level  
yes = 2.837 and no = 2.275 (p-value > 0.05)  
(all p-values from t-test)

Mean Occupational Stress Index Score (standard deviation)  
Control: 79.53 (23.57)  
Test group 1: 133.68 (33.23)  
Test group 2: 158.13 (32.44)  
p-value <0.001  
(p-values from ANOVA with the Scheffe Test)

Having self-reported job stress:  
Odds ratio = 7.5 (95% confidence interval = 3.7, 15.02) from a logistic regression analysis

High stress-High coping: Odds ratio = 0.30 (95% confidence interval = 0.14, 0.66)  
High stress-Low coping: Odds ratio = 2.79 (95% confidence interval = 1.05, 7.43) (reference: low stress) from a logistic regression analysis

|                                      |                 |       |                                                                                                                                       |                                                                                                                                                                                                                                                                                                                           |                                                                                                                                             |                                                                                                                                                                                                                                                                                                              |                                                                                                                                                                         |
|--------------------------------------|-----------------|-------|---------------------------------------------------------------------------------------------------------------------------------------|---------------------------------------------------------------------------------------------------------------------------------------------------------------------------------------------------------------------------------------------------------------------------------------------------------------------------|---------------------------------------------------------------------------------------------------------------------------------------------|--------------------------------------------------------------------------------------------------------------------------------------------------------------------------------------------------------------------------------------------------------------------------------------------------------------|-------------------------------------------------------------------------------------------------------------------------------------------------------------------------|
| Mahendra et al. (2011) <sup>31</sup> | Cross-sectional | India | An occupational stress index of Srivastava, A. K. and Singh, A. P.                                                                    | Control group (n=30): probing pocket depth (PPD) ≤ 3 mm<br>Test group 1 (n=40): at least four sites with probing pocket depth > 4mm and ≤ 6 mm<br>Test group 2 (n=30): at least four sites with probing pocket depth > 6mm                                                                                                | 110 police personnel aged 35-48 years with moderate or established periodontitis                                                            | Mean age (standard deviation); control group: 40.23 (3.46); test group 1: 40.42 (3.54); test group 2: 41.18 (3.78)<br>Sex was not reported.<br>Age groups (SS [n=130], LS [n=68])<br>15-19 years: 0%, 1%<br>20-29 years: 38%, 60%<br>30-44 years: 45%, 20%<br>45-64 years: 17%, 19%<br>Sex was not reported. | None                                                                                                                                                                    |
| Ramji, (2011) <sup>24</sup>          | Cross-sectional | India | Self-reported job stress (having or not)                                                                                              | Community Periodontal Index and Treatment Needs protocol (a tooth scored 3 or 4 indicating increased pocket depth of over 2 mm indicates presence of periodontitis)                                                                                                                                                       | 198 industrial labour full time workers from a small scale sector (SS) and 68 from a large scale sector (LS) between the age of 18-64 years |                                                                                                                                                                                                                                                                                                              | None                                                                                                                                                                    |
| Islam et al. (2019) <sup>32</sup>    | Cross-sectional | Japan | Brief Job Stress Questionnaire developed by referring the demand-control-support model in Japan (low stress, High stress-High coping, | No inflammation of the gingiva or redness and/or swelling of the interdental papilla without gingival recession was classified as non-periodontitis, and any redness and/or swelling in the gingiva with gingival recession and/or tooth mobility was classified as periodontitis, based on visual inspection by dentists | 738 workers of a Japanese crane manufacturing company (92 were women)                                                                       | Mean age = 40.7 (standard deviation = 10.5)<br>12.5%                                                                                                                                                                                                                                                         | Age, gender, daily flossing, regular dental checkup, body mass index, sleeping duration, current smoker, daily alcohol drinking, monthly overtime work, and worker type |

1 and High stress-low  
2 coping)  
3 \*coping was  
4 assessed using a  
5 questionnaire  
6 developed by a  
7 Japanese company

8 **Tooth loss**

|    |                      |                 |       |                                                                                 |                                                                                   |                                                                                   |                                                         |                                                                                                                                                                                               |                                                                                                                                                                |
|----|----------------------|-----------------|-------|---------------------------------------------------------------------------------|-----------------------------------------------------------------------------------|-----------------------------------------------------------------------------------|---------------------------------------------------------|-----------------------------------------------------------------------------------------------------------------------------------------------------------------------------------------------|----------------------------------------------------------------------------------------------------------------------------------------------------------------|
| 9  |                      |                 |       |                                                                                 |                                                                                   |                                                                                   |                                                         |                                                                                                                                                                                               |                                                                                                                                                                |
| 10 | Hayashi et al.       | Cross-sectional | Japan | Karasek job strain model (high job demand and low control and other categories) | Tooth loss via oral examination ( $\geq 4$ teeth lost and $3 \leq$ teeth lost)    | 252 male workers employed at a manufacturing company aged 20–59 years             | Mean age = 38.7 (standard deviation = 11.0) 0%          | Age, type A behaviour, alexythymia, depression, job satisfaction, and life satisfaction                                                                                                       | High job demand and low control (reference: other categories): Odds ratio = 1.2 (95% confidence interval = 0.40, 3.42) from a logistic regression analysis     |
| 11 | (2001) <sup>33</sup> |                 |       |                                                                                 |                                                                                   |                                                                                   |                                                         |                                                                                                                                                                                               |                                                                                                                                                                |
| 12 |                      |                 |       |                                                                                 |                                                                                   |                                                                                   |                                                         |                                                                                                                                                                                               |                                                                                                                                                                |
| 13 |                      |                 |       |                                                                                 |                                                                                   |                                                                                   |                                                         |                                                                                                                                                                                               |                                                                                                                                                                |
| 14 |                      |                 |       |                                                                                 |                                                                                   |                                                                                   |                                                         |                                                                                                                                                                                               |                                                                                                                                                                |
| 15 |                      |                 |       |                                                                                 |                                                                                   |                                                                                   |                                                         |                                                                                                                                                                                               |                                                                                                                                                                |
| 16 | Sato et al.          | Cross-sectional | Japan | Effort-Reward Imbalance model (having or not)                                   | Self-reported tooth loss Having tooth loss or not (= no experience of tooth loss) | 1,195 employees aged 25–50 years old who work 20 h per week or more (women = 569) | Median age = 37 (1st and 3rd quartiles = 31 and 43) 48% | Age, sex, marital status, annual household income, years of education, employment status, occupation, working hours per week, job position, company size, body mass index, and smoking status | High effort-reward imbalance ratio: Prevalence ratio = 1.20 (95% confidence interval = 1.01, 1.42) from Poisson regression models with a robust error variance |
| 17 | (2020) <sup>34</sup> |                 |       |                                                                                 |                                                                                   |                                                                                   |                                                         |                                                                                                                                                                                               |                                                                                                                                                                |
| 18 |                      |                 |       |                                                                                 |                                                                                   |                                                                                   |                                                         |                                                                                                                                                                                               |                                                                                                                                                                |
| 19 |                      |                 |       |                                                                                 |                                                                                   |                                                                                   |                                                         |                                                                                                                                                                                               |                                                                                                                                                                |
| 20 |                      |                 |       |                                                                                 |                                                                                   |                                                                                   |                                                         |                                                                                                                                                                                               |                                                                                                                                                                |
| 21 |                      |                 |       |                                                                                 |                                                                                   |                                                                                   |                                                         |                                                                                                                                                                                               |                                                                                                                                                                |
| 22 |                      |                 |       |                                                                                 |                                                                                   |                                                                                   |                                                         |                                                                                                                                                                                               |                                                                                                                                                                |
| 23 |                      |                 |       |                                                                                 |                                                                                   |                                                                                   |                                                         |                                                                                                                                                                                               |                                                                                                                                                                |
| 24 |                      |                 |       |                                                                                 |                                                                                   |                                                                                   |                                                         |                                                                                                                                                                                               |                                                                                                                                                                |
| 25 |                      |                 |       |                                                                                 |                                                                                   |                                                                                   |                                                         |                                                                                                                                                                                               |                                                                                                                                                                |
| 26 |                      |                 |       |                                                                                 |                                                                                   |                                                                                   |                                                         |                                                                                                                                                                                               |                                                                                                                                                                |
| 27 |                      |                 |       |                                                                                 |                                                                                   |                                                                                   |                                                         |                                                                                                                                                                                               |                                                                                                                                                                |
| 28 |                      |                 |       |                                                                                 |                                                                                   |                                                                                   |                                                         |                                                                                                                                                                                               |                                                                                                                                                                |
| 29 |                      |                 |       |                                                                                 |                                                                                   |                                                                                   |                                                         |                                                                                                                                                                                               |                                                                                                                                                                |
| 30 |                      |                 |       |                                                                                 |                                                                                   |                                                                                   |                                                         |                                                                                                                                                                                               |                                                                                                                                                                |
| 31 |                      |                 |       |                                                                                 |                                                                                   |                                                                                   |                                                         |                                                                                                                                                                                               |                                                                                                                                                                |
| 32 |                      |                 |       |                                                                                 |                                                                                   |                                                                                   |                                                         |                                                                                                                                                                                               |                                                                                                                                                                |
| 33 |                      |                 |       |                                                                                 |                                                                                   |                                                                                   |                                                         |                                                                                                                                                                                               |                                                                                                                                                                |
| 34 |                      |                 |       |                                                                                 |                                                                                   |                                                                                   |                                                         |                                                                                                                                                                                               |                                                                                                                                                                |
| 35 |                      |                 |       |                                                                                 |                                                                                   |                                                                                   |                                                         |                                                                                                                                                                                               |                                                                                                                                                                |
| 36 |                      |                 |       |                                                                                 |                                                                                   |                                                                                   |                                                         |                                                                                                                                                                                               |                                                                                                                                                                |
| 37 |                      |                 |       |                                                                                 |                                                                                   |                                                                                   |                                                         |                                                                                                                                                                                               |                                                                                                                                                                |
| 38 |                      |                 |       |                                                                                 |                                                                                   |                                                                                   |                                                         |                                                                                                                                                                                               |                                                                                                                                                                |
| 39 |                      |                 |       |                                                                                 |                                                                                   |                                                                                   |                                                         |                                                                                                                                                                                               |                                                                                                                                                                |
| 40 |                      |                 |       |                                                                                 |                                                                                   |                                                                                   |                                                         |                                                                                                                                                                                               |                                                                                                                                                                |
| 41 |                      |                 |       |                                                                                 |                                                                                   |                                                                                   |                                                         |                                                                                                                                                                                               |                                                                                                                                                                |
| 42 |                      |                 |       |                                                                                 |                                                                                   |                                                                                   |                                                         |                                                                                                                                                                                               |                                                                                                                                                                |
| 43 |                      |                 |       |                                                                                 |                                                                                   |                                                                                   |                                                         |                                                                                                                                                                                               |                                                                                                                                                                |
| 44 |                      |                 |       |                                                                                 |                                                                                   |                                                                                   |                                                         |                                                                                                                                                                                               |                                                                                                                                                                |
| 45 |                      |                 |       |                                                                                 |                                                                                   |                                                                                   |                                                         |                                                                                                                                                                                               |                                                                                                                                                                |
| 46 |                      |                 |       |                                                                                 |                                                                                   |                                                                                   |                                                         |                                                                                                                                                                                               |                                                                                                                                                                |
| 47 |                      |                 |       |                                                                                 |                                                                                   |                                                                                   |                                                         |                                                                                                                                                                                               |                                                                                                                                                                |



Table 2. Quality assessment of included studies

|                                           | Q1  | Q2  | Q3  | Q4  | Q5  | Q6 | Q7 | Q8  | Q9  | Q10 | Q11 | Q12 | Q13 | Q14 | Quality Rating (Good, Fair, or Poor) |
|-------------------------------------------|-----|-----|-----|-----|-----|----|----|-----|-----|-----|-----|-----|-----|-----|--------------------------------------|
| Marcenes and Sheiham (1992) <sup>27</sup> | Yes | Yes | NR  | Yes | Yes | No | No | Yes | Yes | No  | Yes | Yes | NA  | Yes | Fair                                 |
| Freeman and Goss (1993) <sup>23</sup>     | Yes | Yes | NR  | No  | Yes | No | No | Yes | Yes | No  | Yes | Yes | NA  | No  | Poor                                 |
| Linden et al. (1996) <sup>28</sup>        | Yes | Yes | NR  | Yes | Yes | No | No | Yes | Yes | No  | Yes | Yes | NA  | No  | Poor                                 |
| Genco et al. (1999) <sup>29</sup>         | Yes | Yes | NR  | No  | Yes | No | No | Yes | No  | No  | Yes | Yes | NA  | No  | Poor                                 |
| Akhter et al. (2005) <sup>30</sup>        | Yes | Yes | NR  | No  | Yes | No | No | NA  | No  | No  | Yes | Yes | NA  | No  | Poor                                 |
| Talib Bandar (2009) <sup>22</sup>         | Yes | Yes | NR  | No  | No  | No | No | NA  | No  | No  | Yes | Yes | NA  | No  | Poor                                 |
| Mahendra et al. (2011) <sup>31</sup>      | Yes | Yes | NR  | Yes | Yes | No | No | NA  | Yes | No  | Yes | Yes | NA  | No  | Poor                                 |
| Ramji (2011) <sup>24</sup>                | Yes | Yes | No  | Yes | Yes | No | No | NA  | No  | No  | Yes | Yes | NA  | No  | Poor                                 |
| Islam et al. (2019) <sup>32</sup>         | Yes | Yes | NR  | Yes | Yes | No | No | NA  | No  | No  | Yes | Yes | NA  | No  | Poor                                 |
| Hayashi et al. (2001) <sup>33</sup>       | Yes | Yes | Yes | Yes | Yes | No | No | NA  | Yes | No  | Yes | Yes | NA  | No  | Fair                                 |
| Sato et al. (2020) <sup>34</sup>          | Yes | Yes | No  | Yes | Yes | No | No | NA  | Yes | No  | Yes | No  | NA  | Yes | Fair                                 |

Abbreviation: CD, cannot determine; NA, not applicable; NR, not reported

Q1. Was the research question or objective in this paper clearly stated?

Q2. Was the study population clearly specified and defined?

Q3. Was the participation rate of eligible persons at least 50%?

Q4. Were all the subjects selected or recruited from the same or similar populations (including the same time period)? Were inclusion and exclusion criteria for being in the study prespecified and applied uniformly to all participants?

Q5. Was a sample size justification, power description, or variance and effect estimates provided?

Q6. For the analyses in this paper, were the exposure(s) of interest measured prior to the outcome(s) being measured?

Q7. Was the timeframe sufficient so that one could reasonably expect to see an association between exposure and outcome if it existed?

Q8. For exposures that can vary in amount or level, did the study examine different levels of the exposure as related to the outcome (e.g., categories of

1 exposure, or exposure measured as continuous variable)?

2  
3 Q9. Were the exposure measures (independent variables) clearly defined, valid, reliable, and implemented consistently across all study participants?

4  
5 Q10. Was the exposure(s) assessed more than once over time?

6  
7 Q11. Were the outcome measures (dependent variables) clearly defined, valid, reliable, and implemented consistently across all study participants?

8  
9 Q12. Were the outcome assessors blinded to the exposure status of participants?

10  
11 Q13. Was loss to follow-up after baseline 20% or less?

12  
13 Q14. Were key potential confounding variables measured and adjusted statistically for their impact on the relationship between exposure(s) and  
14 outcome(s)?  
15  
16  
17  
18  
19  
20  
21  
22  
23  
24  
25  
26  
27  
28  
29  
30  
31  
32  
33  
34  
35  
36  
37  
38  
39  
40  
41  
42  
43  
44  
45  
46  
47

1 Figure 1. Flow of search strategy and selection of studies for a systematic review.  
2  
3  
4  
5  
6  
7  
8  
9  
10  
11  
12  
13  
14  
15  
16  
17  
18  
19  
20  
21  
22  
23  
24  
25  
26  
27  
28  
29  
30  
31  
32  
33  
34  
35  
36  
37  
38  
39  
40  
41  
42  
43  
44  
45  
46  
47

For peer review only

1 The search of two databases (PubMed  
2 and Scopus) on August 12, 2020  
3 identified 402 records

4  
5 129 duplicated records were removed

6  
7 The titles and abstracts of 273 records  
8 were screened  
9

10  
11  
12  
13 Among them, 11 articles met the  
14 inclusion criteria  
15  
16

17  
18 Three additional records were identified  
19 through other sources (reference lists and hand  
20 search)  
21

22  
23 Full text assessment of 14 articles were  
24 performed  
25

26  
27 Excluded articles after full-text assessment  
28 (n=3; Retracted [n=1] and used composite  
29 outcome [n=2])  
30

31 Finally, 11 articles were included  
32 (n=1, caries and periodontal status; n=8,  
33 periodontal status, n=2: tooth loss)  
34

Supplemental Table 1. The precise search strategies for each database.

| Database | Date            | Combination of terms used                                                     | Limitation | Result |
|----------|-----------------|-------------------------------------------------------------------------------|------------|--------|
| PubMed   | August 12, 2020 | ("job strain" OR "effort reward") AND (dental OR oral)                        | English    | 22     |
| PubMed   | August 12, 2020 | ("job stress" OR "work stress" OR "occupational stress") AND (dental OR oral) | English    | 143    |
| Scopus   | August 12, 2020 | ("job strain" OR "effort reward") AND (dental OR oral)                        | English    | 20     |
| Scopus   | August 12, 2020 | ("job stress" OR "work stress" OR "occupational stress") AND (dental OR oral) | English    | 217    |



# PRISMA 2009 Checklist

1  
2  
3  
4  
5  
6  
7  
8  
9  
10  
11  
12  
13  
14  
15  
16  
17  
18  
19  
20  
21  
22  
23  
24  
25  
26  
27  
28  
29  
30  
31  
32  
33  
34  
35  
36  
37  
38  
39  
40  
41  
42  
43  
44  
45  
46  
47

| Section/topic                      | #  | Checklist item                                                                                                                                                                                                                                                                                              | Reported on page # |
|------------------------------------|----|-------------------------------------------------------------------------------------------------------------------------------------------------------------------------------------------------------------------------------------------------------------------------------------------------------------|--------------------|
| <b>TITLE</b>                       |    |                                                                                                                                                                                                                                                                                                             |                    |
| Title                              | 1  | Identify the report as a systematic review, meta-analysis, or both.                                                                                                                                                                                                                                         | p1                 |
| <b>ABSTRACT</b>                    |    |                                                                                                                                                                                                                                                                                                             |                    |
| Structured summary                 | 2  | Provide a structured summary including, as applicable: background; objectives; data sources; study eligibility criteria, participants, and interventions; study appraisal and synthesis methods; results; limitations; conclusions and implications of key findings; systematic review registration number. | p2, 3              |
| <b>INTRODUCTION</b>                |    |                                                                                                                                                                                                                                                                                                             |                    |
| Rationale                          | 3  | Describe the rationale for the review in the context of what is already known.                                                                                                                                                                                                                              | p5, 6              |
| Objectives                         | 4  | Provide an explicit statement of questions being addressed with reference to participants, interventions, comparisons, outcomes, and study design (PICOS).                                                                                                                                                  | p6                 |
| <b>METHODS</b>                     |    |                                                                                                                                                                                                                                                                                                             |                    |
| Protocol and registration          | 5  | Indicate if a review protocol exists, if and where it can be accessed (e.g., Web address), and, if available, provide registration information including registration number.                                                                                                                               | Not applicable     |
| Eligibility criteria               | 6  | Specify study characteristics (e.g., PICOS, length of follow-up) and report characteristics (e.g., years considered, language, publication status) used as criteria for eligibility, giving rationale.                                                                                                      | p6                 |
| Information sources                | 7  | Describe all information sources (e.g., databases with dates of coverage, contact with study authors to identify additional studies) in the search and date last searched.                                                                                                                                  | p6, 7              |
| Search                             | 8  | Present full electronic search strategy for at least one database, including any limits used, such that it could be repeated.                                                                                                                                                                               | p6, 7              |
| Study selection                    | 9  | State the process for selecting studies (i.e., screening, eligibility, included in systematic review, and, if applicable, included in the meta-analysis).                                                                                                                                                   | p6, 7              |
| Data collection process            | 10 | Describe method of data extraction from reports (e.g., piloted forms, independently, in duplicate) and any processes for obtaining and confirming data from investigators.                                                                                                                                  | p7                 |
| Data items                         | 11 | List and define all variables for which data were sought (e.g., PICOS, funding sources) and any assumptions and simplifications made.                                                                                                                                                                       | p7                 |
| Risk of bias in individual studies | 12 | Describe methods used for assessing risk of bias of individual studies (including specification of whether this was done at the study or outcome level), and how this information is to be used in any data synthesis.                                                                                      | p7                 |
| Summary measures                   | 13 | State the principal summary measures (e.g., risk ratio, difference in means).                                                                                                                                                                                                                               | p7                 |
| Synthesis of results               | 14 | Describe the methods of handling data and combining results of studies, if done, including measures of consistency (e.g., I <sup>2</sup> ) for each meta-analysis.                                                                                                                                          | Not applicable     |

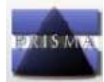

# PRISMA 2009 Checklist

Page 1 of 2

|  |  |  |   |
|--|--|--|---|
|  |  |  | * |
|--|--|--|---|

| Section/topic                 | #  | Checklist item                                                                                                                                                                                           | Reported on page # |
|-------------------------------|----|----------------------------------------------------------------------------------------------------------------------------------------------------------------------------------------------------------|--------------------|
| Risk of bias across studies   | 15 | Specify any assessment of risk of bias that may affect the cumulative evidence (e.g., publication bias, selective reporting within studies).                                                             | Not applicable *   |
| Additional analyses           | 16 | Describe methods of additional analyses (e.g., sensitivity or subgroup analyses, meta-regression), if done, indicating which were pre-specified.                                                         | Not applicable *   |
| <b>RESULTS</b>                |    |                                                                                                                                                                                                          |                    |
| Study selection               | 17 | Give numbers of studies screened, assessed for eligibility, and included in the review, with reasons for exclusions at each stage, ideally with a flow diagram.                                          | p8                 |
| Study characteristics         | 18 | For each study, present characteristics for which data were extracted (e.g., study size, PICOS, follow-up period) and provide the citations.                                                             | p8, 9              |
| Risk of bias within studies   | 19 | Present data on risk of bias of each study and, if available, any outcome level assessment (see item 12).                                                                                                | p11                |
| Results of individual studies | 20 | For all outcomes considered (benefits or harms), present, for each study: (a) simple summary data for each intervention group (b) effect estimates and confidence intervals, ideally with a forest plot. | p8-11              |
| Synthesis of results          | 21 | Present results of each meta-analysis done, including confidence intervals and measures of consistency.                                                                                                  | Not applicable *   |
| Risk of bias across studies   | 22 | Present results of any assessment of risk of bias across studies (see Item 15).                                                                                                                          | Not applicable *   |
| Additional analysis           | 23 | Give results of additional analyses, if done (e.g., sensitivity or subgroup analyses, meta-regression [see Item 16]).                                                                                    | Not applicable *   |
| <b>DISCUSSION</b>             |    |                                                                                                                                                                                                          |                    |
| Summary of evidence           | 24 | Summarize the main findings including the strength of evidence for each main outcome; consider their relevance to key groups (e.g., healthcare providers, users, and policy makers).                     | p11, 12            |



# PRISMA 2009 Checklist

1  
2  
3  
4  
5  
6  
7  
8  
9  
10  
11  
12  
13  
14  
15  
16  
17  
18  
19  
20  
21  
22  
23  
24  
25  
26  
27  
28  
29  
30  
31  
32  
33  
34  
35  
36  
37  
38  
39  
40  
41  
42  
43  
44  
45  
46  
47

|                |    |                                                                                                                                                               |     |
|----------------|----|---------------------------------------------------------------------------------------------------------------------------------------------------------------|-----|
| Limitations    | 25 | Discuss limitations at study and outcome level (e.g., risk of bias), and at review-level (e.g., incomplete retrieval of identified research, reporting bias). | p12 |
| Conclusions    | 26 | Provide a general interpretation of the results in the context of other evidence, and implications for future research.                                       | p14 |
| <b>FUNDING</b> |    |                                                                                                                                                               |     |
| Funding        | 27 | Describe sources of funding for the systematic review and other support (e.g., supply of data); role of funders for the systematic review.                    | p15 |

\*Because a meta-analysis was not conducted, these sections were not applicable.

From: Moher D, Liberati A, Tetzlaff J, Altman DG, The PRISMA Group (2009). Preferred Reporting Items for Systematic Reviews and Meta-Analyses: The PRISMA Statement. PLoS Med 6(7): e1000097. doi:10.1371/journal.pmed1000097

For more information, visit: [www.prisma-statement.org](http://www.prisma-statement.org).

Page 2 of 2
