# Supplementary material for: Work stress and oral conditions: a systematic review of observational studies
Source: PubMed Central journal article supplement — BMJ Open. 2021 May 28;11(5):e046532. doi: 10.1136/bmjopen-2020-046532 (PMC8166606; doi:10.1136/bmjopen-2020-046532), 2021-05-28
Supplement: bmjopen-2020-046532supp001.pdf [file bmjopen-2020-046532supp001.pdf]

Supplemental Table 1. The precise search strategies for each database.

| Database | Date            | Combination of terms used                                                     | Limitation | Result |
|----------|-----------------|-------------------------------------------------------------------------------|------------|--------|
| PubMed   | August 12, 2020 | ("job strain" OR "effort reward") AND (dental OR oral)                        | English    | 22     |
| PubMed   | August 12, 2020 | ("job stress" OR "work stress" OR "occupational stress") AND (dental OR oral) | English    | 143    |
| Scopus   | August 12, 2020 | ("job strain" OR "effort reward") AND (dental OR oral)                        | English    | 20     |
| Scopus   | August 12, 2020 | ("job stress" OR "work stress" OR "occupational stress") AND (dental OR oral) | English    | 217    |
